# Supplementary material for: t-BuOOH/TiO2 Photocatalytic System as a Convenient Peroxyl Radical Source at Room Temperature under Visible Light and Its Application for the CH-Peroxidation of Barbituric Acids
Source: MDPI journal article supplement (doi:10.3390/catal13091306), 2023-09-19

***Supporting Information***

***t*-BuOOH / TiO<sub>2</sub> photocatalytic system as a convenient peroxy radical source at room temperature under visible light and its application for CH-peroxidation of Barbituric acids**

**Elena R. Lopat'eva<sup>1</sup>, Igor B. Krylov<sup>1\*</sup>, and Alexander Terent'ev<sup>1\*</sup>**

<sup>1</sup> N. D. Zelinsky Institute of Organic Chemistry, Russian Academy of Sciences, 47

Leninsky Prospekt, Moscow 119991, Russia

E-mail: [krylovigor@yandex.ru](mailto:krylovigor@yandex.ru); [terentev@ioc.ac.ru](mailto:terentev@ioc.ac.ru)

## Table of contents

|                                                                              |     |
|------------------------------------------------------------------------------|-----|
| EPR experiments .....                                                        | S3  |
| The appearance of the TiO <sub>2</sub> suspension with <i>t</i> -BuOOH ..... | S10 |
| UV-Vis spectrum of Blue LED used in the present study .....                  | S10 |
| Spectral data of the synthesized compounds .....                             | S11 |

## EPR experiments

EPR spectra were recorded in 100  $\mu$ L capillary tubes (inner diameter ca. 1.2 mm) using X-Band EPR spectrometer Adani Spinscan X at 31-32 °C with following settings: sweep width – 7 mT, sweep time – 60 s, modulation amplitude – 100  $\mu$ T, single scan for all experiments. For experiments with irradiation by blue LED, samples were irradiated inside the EPR cavity after instrument tuning. EPR spectra recording was started immediately after the start of irradiation. For experiments with UV irradiation, samples were irradiated by 20 W ultraviolet (365 nm) LED for 30 seconds (1 cm from the LED to the sample in a capillary tube), then samples were placed in EPR cavity, and spectra were recorded (ca. 2-3 min after irradiation). Unless otherwise noted, samples were prepared under room light.

Samples for EPR studies were prepared by mixing solutions or suspensions of interest (150  $\mu$ L, mixture A) with 150  $\mu$ L of solution of spin trap DMPO (5,5-Dimethyl-1-pyrroline N-oxide, solution B). DMPO solution (B) was prepared from DMPO (10 mg, 88.3  $\mu$ mol) and MeCN (1 mL). For EPR measurements under argon, mixture A and solution B were prepared under air, but flushed by argon flow for two minutes after mixing. Compositions of studied mixtures (A) are given below:

TiO<sub>2</sub> + *t*-BuOOH: To TiO<sub>2</sub> (10 mg) was added MeCN (1 mL), the mixture was sonicated in an ultrasonic bath for 1 minute, then *t*-BuOOH 70% aq. (257 mg, 2 mmol) was added.

*t*-BuOOH: *t*-BuOOH 70% aq. (257 mg, 2 mmol) was dissolved in MeCN (1 mL).

TiO<sub>2</sub>: TiO<sub>2</sub> (10 mg) was dissolved in MeCN (1 mL).

*t*-BuOO*t*-Bu: di-tert-butylperoxide (292 mg, 2 mmol) was dissolved in MeCN (1 mL).

To study the formation of free radicals in the *t*-BuOOH-TiO<sub>2</sub> system EPR spin trapping experiments with DMPO were realized (Figure S1). In each experiment, spectrum was recorded before blue LED irradiation (black line) and under blue LED irradiation (red line). Intensive EPR signal was observed for the mixture of TiO<sub>2</sub>, *t*-BuOOH and DMPO (Figure S1, a) even before irradiation, which was surprising, because no peroxidation product **9a** and no Barbituric acid **8a** conversion was observed without blue light irradiation (see Table 1, entry 2). In order to check, whether radical formation is associated with the room lighting, under which samples were prepared, we performed control experiment with sample preparation in the dark room (minimal light exposure, Figure S1, a, blue line). The same signal intensity was observed as in case of sample preparation under room lighting, indicating that free radicals can be formed in *t*-BuOOH-TiO<sub>2</sub> even without light exposure. However, as we can see from Table 1, entry 2 in the main text of the paper, this is not sufficient for the preparative peroxidation to take place. Anyway, EPR signal intensity increased upon irradiation by blue LED (Figure S1, a, red line), which confirms

the role of blue light in the generation of free radicals from *t*-BuOOH. No signal was observed for TiO<sub>2</sub>-DMPO mixture (Figure S1, b) both without or with blue LED irradiation and only trace signals were observed for *t*-BuOOH-DMPO mixture (Figure S1, c). These results indicate that signals observed in Figure S1 (a) truly correspond to free-radical species formed upon interaction of *t*-BuOOH with TiO<sub>2</sub>.

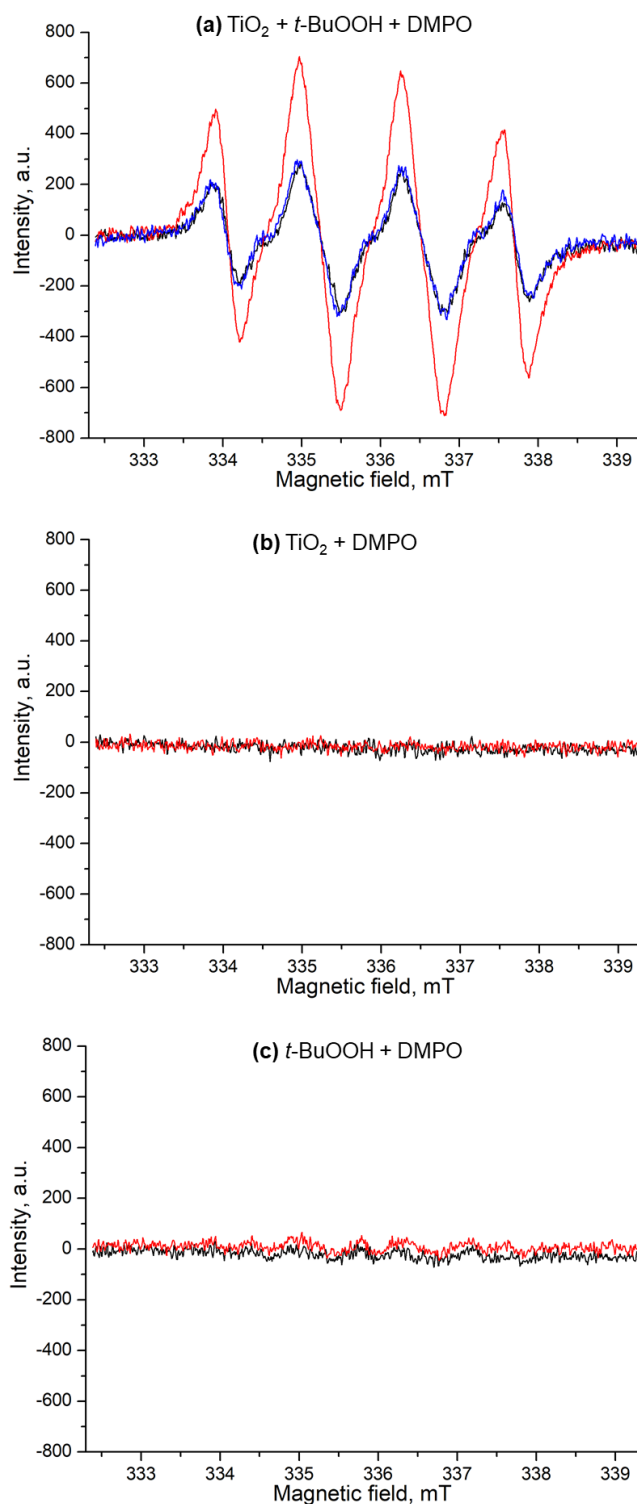

**Figure S1.** EPR spectra of spin trapping experiments under air. Black lines – EPR spectra before irradiation. Red lines – EPR spectra under Blue LED irradiation. Blue line in experiment (a) – spectrum of the sample prepared under dark conditions.

In order to propose the structure of observed DMPO spin adduct, we performed experiment analogous to the experiment of Figure 1, a, but under argon atmosphere in order to increase the resolution (Figure S2, a). Control experiments were conducted with the generation of O-centered

radical from *t*-BuOOH (Figure S2, b) and *t*-BuOO*t*-Bu (Figure S2, c) upon UV irradiation. Observed signals were simulated using EasySpin 5.2.35 program [1], results are presented in Figure S3 and Table S1.

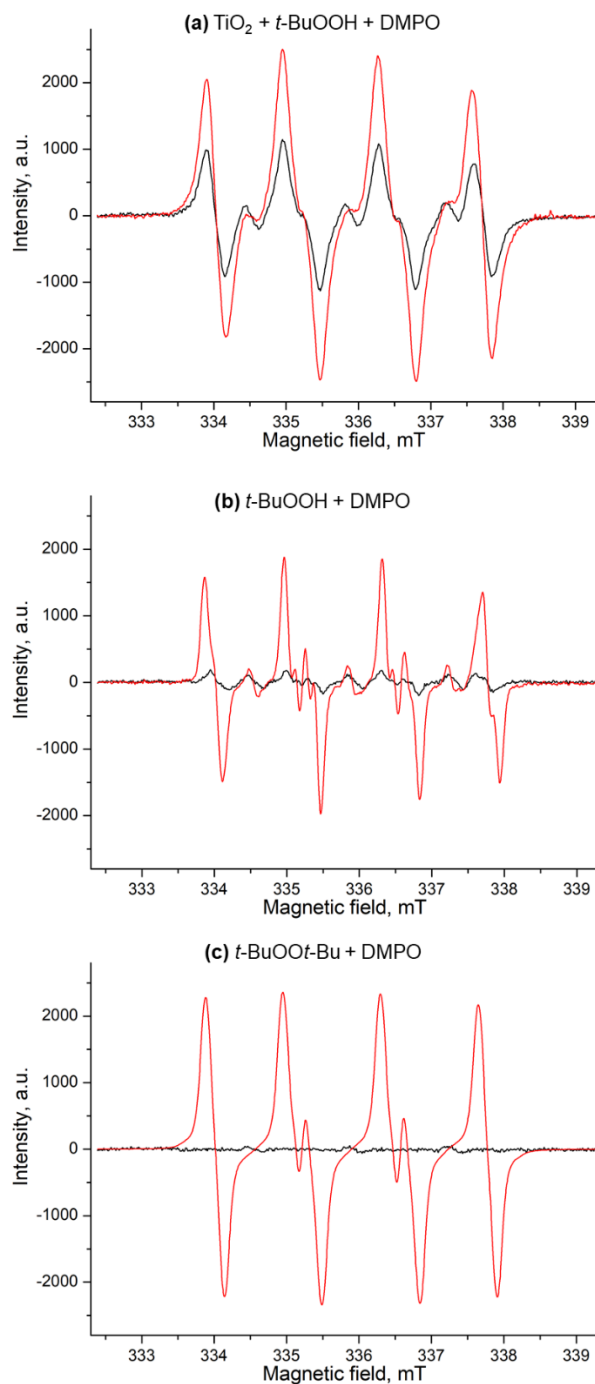

**Figure S2.** EPR spectra of spin trapping experiments under argon atmosphere. Black lines – EPR spectra before irradiation. Red line in (a) – EPR spectrum under Blue LED irradiation. Red lines in experiments (b) and (c) – EPR spectra after UV (365 nm) irradiation. The intensity of signal upon UV irradiation in experiment (c) was significantly higher than in other experiments, it was reduced by a factor of 25 for this figure.

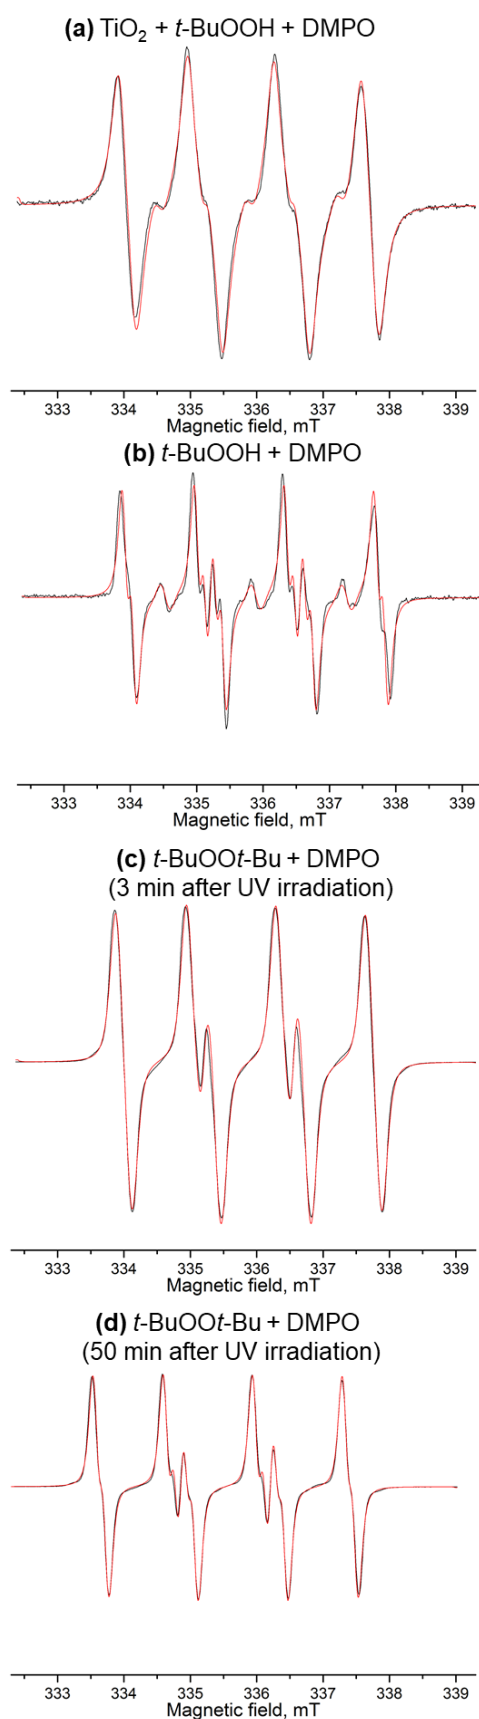

**Figure S3.** Experimental (black) and simulated (red) EPR spectra for mixtures in MeCN:  $\text{TiO}_2 + t\text{-BuOOH} + \text{DMPO}$  under blue led irradiation (a),  $t\text{-BuOOH} + \text{DMPO}$  after 365 nm UV irradiation (b), and  $t\text{-BuOO}t\text{-Bu} + \text{DMPO}$  after 365 nm UV irradiation (c) and (d)

For *t*-BuOO*t*-Bu + DMPO mixture radical concentration was significantly higher than in other cases judging one EPR intensity (ca. 25 times higher signal), which apparently resulted in line broadening (Figure S3, c). Resolution increased after partial radical decomposition over 50 minutes (Figure S3, d). In the case of TiO<sub>2</sub> + *t*-BuOOH + DMPO mixture, line broadening maybe associated with TiO<sub>2</sub> presence (heterogeneous character of the mixture). In all cases, main signals (Figure S3, a–d) are simulated quite well employing very close parameters:  $g = 2.0059$ – $2.0060$ ,  $a_N = 1.31$ – $1.36$  mT,  $a_H^\beta = 1.04$ – $1.09$  mT,  $a_H^\gamma = 0.12$ – $0.13$  mT. This signal can be assigned to the spin adduct of *t*-BuO• radical to DMPO.[2,3] However, recent studies showed that parameters of alkoxyl (for example, *t*-BuO•) and peroxy (for example, *t*-BuOO•) adducts to DMPO can be practically indistinguishable by EPR.[4] This assumption is in agreement with very similar EPR spectra observed for photolysis of *t*-BuOOH and *t*-BuOO*t*-Bu (Figure S3, b-d) in our case despite the fact that *t*-BuOO*t*-Bu can produce only *t*-BuO• radicals, whereas *t*-BuOOH can produce both *t*-BuO• and *t*-BuOO• radicals. According to simulation data (Table S1), seemingly different signals differ almost only by linewidths. Thus, unambiguous assignment of the observed signals to *t*-BuO• or *t*-BuOO• adducts to DMPO can not be made. It should also be noted that additional small signal ( $a_N = 1.37$  mT) was observed in TiO<sub>2</sub> + *t*-BuOOH + DMPO and *t*-BuOOH + DMPO systems.



**Table S1.** Simulation parameters for spectra presented in Figure S3 in comparison with literature data

| Sample                                                                              | g       | $a_N$ , mT | $a_H^\beta$ , mT | $a_H^\gamma$ , mT | Voigtian broadenin g, mT <sup>a</sup> | Weight |
|-------------------------------------------------------------------------------------|---------|------------|------------------|-------------------|---------------------------------------|--------|
| TiO <sub>2</sub> + <i>t</i> -BuOOH + DMPO, blue LED                                 | 2.00595 | 1.3143     | 1.0367           | 0.127             | 0.06, 0.16                            | 0.99   |
|                                                                                     | 2.00585 | 1.37       | -                | -                 | 0.17, 0                               | 0.01   |
| <i>t</i> -BuOOH + DMPO, 365 nm LED                                                  | 2.00593 | 1.356      | 1.088            | 0.122             | 0.017, 0.086                          | 0.97   |
|                                                                                     | 2.00585 | 1.37       | -                | -                 | 0.15, 0                               | 0.03   |
| <i>t</i> -BuOO <i>t</i> -Bu + DMPO, 365 nm LED, 3 min after irradiation             | 2.00598 | 1.352      | 1.066            | 0.119             | 0.115, 0.08                           | 1      |
| <i>t</i> -BuOO <i>t</i> -Bu + DMPO, 365 nm LED, 50 min after irradiation            | 2.00585 | 1.351      | 1.061            | 0.13              | 0.08, 0.061                           | 1      |
| Literature values for DMPO <i>t</i> -BuO• radical adduct in MeCN:                   |         |            |                  |                   |                                       |        |
| 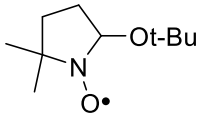 |         |            |                  |                   |                                       |        |
| Ref. [2]                                                                            | -       | 1.33       | 0.77             | 0.09              | -                                     | -      |
| Ref. [3]                                                                            | -       | 1.35       | 1.075            | 0.127             | -                                     | -      |

<sup>a</sup> First value corresponds to Gaussian linewidth, the second corresponds to Lorentzian linewidth, both values are peak-to-peak in first-derivative spectrum.

## References

1. Stoll, S.; Schweiger, A. EasySpin, a Comprehensive Software Package for Spectral Simulation and Analysis in EPR. *Journal of Magnetic Resonance* **2006**, *178*, 42–55, doi:10.1016/j.jmr.2005.08.013.
2. Peng, F.; McLaughlin, M.; Liu, Y.; Mangion, I.; Tschaen, D.M.; Xu, Y. A Mild Cu(I)-Catalyzed Oxidative Aromatization of Indolines to Indoles. *J. Org. Chem.* **2016**, *81*, 10009–10015, doi:10.1021/acs.joc.6b01854.
3. Oyama, R.; Abe, M. Reactivity and Product Analysis of a Pair of Cumyloxyl and *Tert*-Butoxyl Radicals Generated in Photolysis of *Tert*-Butyl Cumyl Peroxide. *J. Org. Chem.* **2020**, *85*, 8627–8638, doi:10.1021/acs.joc.0c01016.

4. Dikalov, S.I.; Mason, R.P. Reassignment of Organic Peroxyl Radical Adducts. *Free Radical Biology and Medicine* **1999**, 27, 864–872, doi:10.1016/S0891-5849(99)00134-3.

### The appearance of the $\text{TiO}_2$ suspension with *t*-BuOOH

Contents of the left vial (Figure S4):  $\text{TiO}_2$  Hombikat UV100 (10 mg), MeCN (1 mL) and *t*-BuOOH (70%, 256 mg).

Contents of the right vial (Figure S4):  $\text{TiO}_2$  Hombikat UV100 (10 mg), MeCN (1 mL).

Both mixtures were sonicated for 2 minutes in an ultrasonic bath.

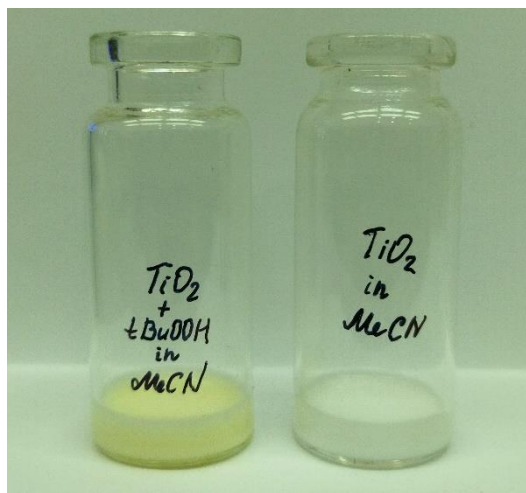

**Figure S4.** Appearance of  $\text{TiO}_2$  suspension in MeCN in the presence (left) and absence (right) of *t*-BuOOH

### UV-Vis spectrum of Blue LED used in the present study

The UV-Vis emission spectrum of the Blue LED (Figure S5) was recorded Ocean Optics FLAME-S-XR1 spectrometer.

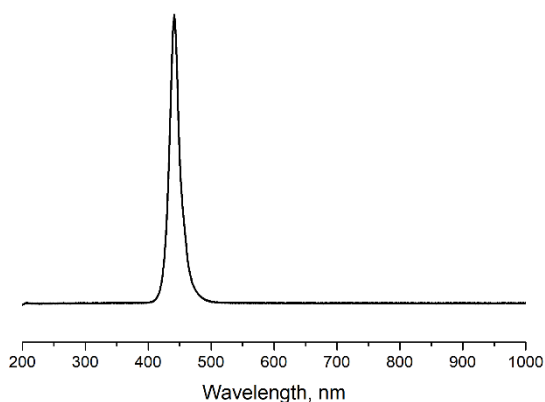

**Figure S5.** UV-Vis spectrum of 10W Blue LED used for photochemical syntheses in the present study ( $\lambda_{\text{max}} = 443 \text{ nm}$ )

## **Spectral data of the synthesized compounds**

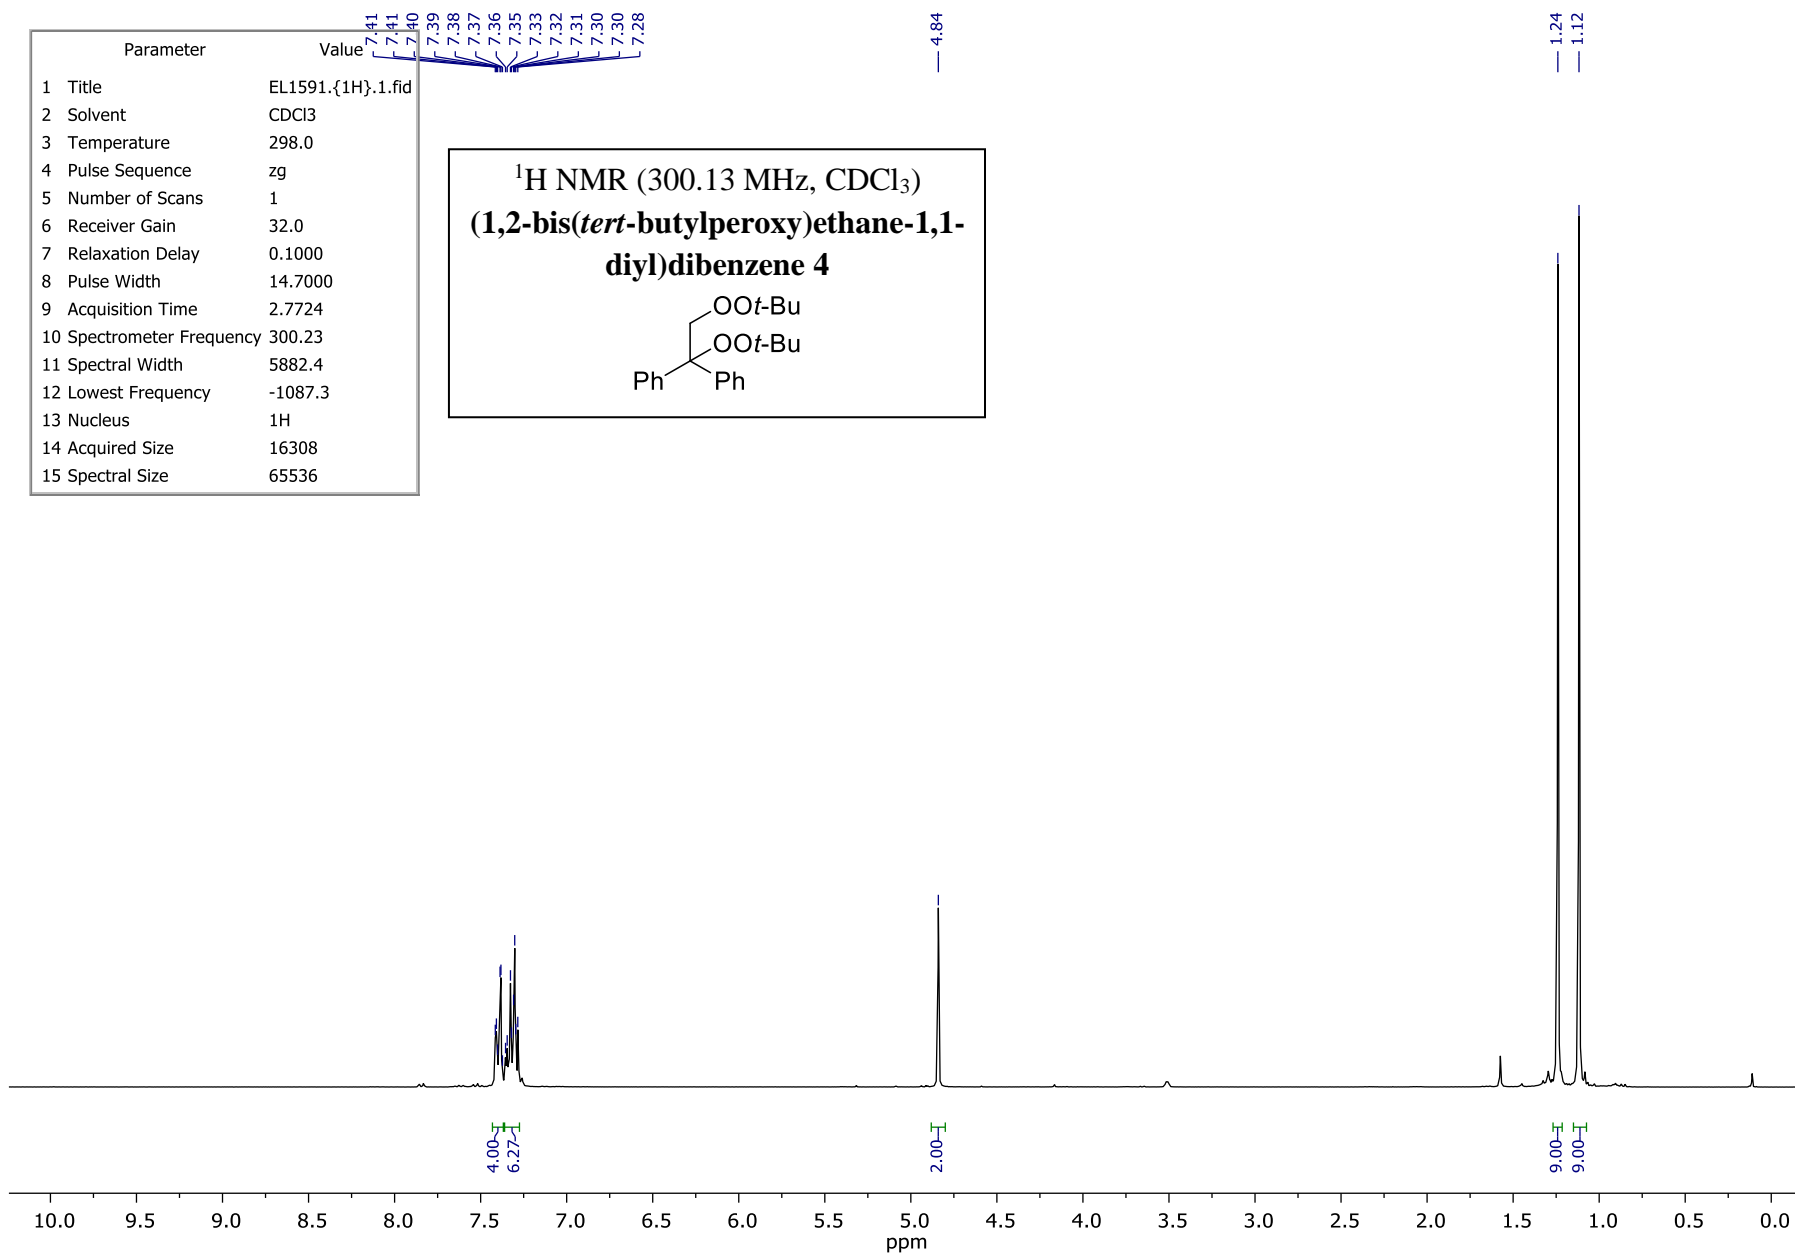

| Parameter                 | Value              |
|---------------------------|--------------------|
| 1 Title                   | EL1591.{13C}.2.fid |
| 2 Solvent                 | CDCl3              |
| 3 Temperature             | 298.0              |
| 4 Pulse Sequence          | zgpg30             |
| 5 Number of Scans         | 512                |
| 6 Receiver Gain           | 101.0              |
| 7 Relaxation Delay        | 0.8000             |
| 8 Pulse Width             | 9.9000             |
| 9 Acquisition Time        | 1.1431             |
| 10 Spectrometer Frequency | 75.50              |
| 11 Spectral Width         | 17857.1            |
| 12 Lowest Frequency       | -1370.1            |
| 13 Nucleus                | 13C                |
| 14 Acquired Size          | 20412              |
| 15 Spectral Size          | 65536              |

142.17

127.94  
127.65  
127.47

85.82  
80.64  
79.76  
77.78  
77.58  
77.16  
76.74

26.75  
26.39

<sup>13</sup>C NMR (75.48 MHz, CDCl<sub>3</sub>)  
(1,2-bis(tert-butylperoxy)ethane-  
1,1-diyl)dibenzene 4

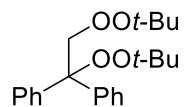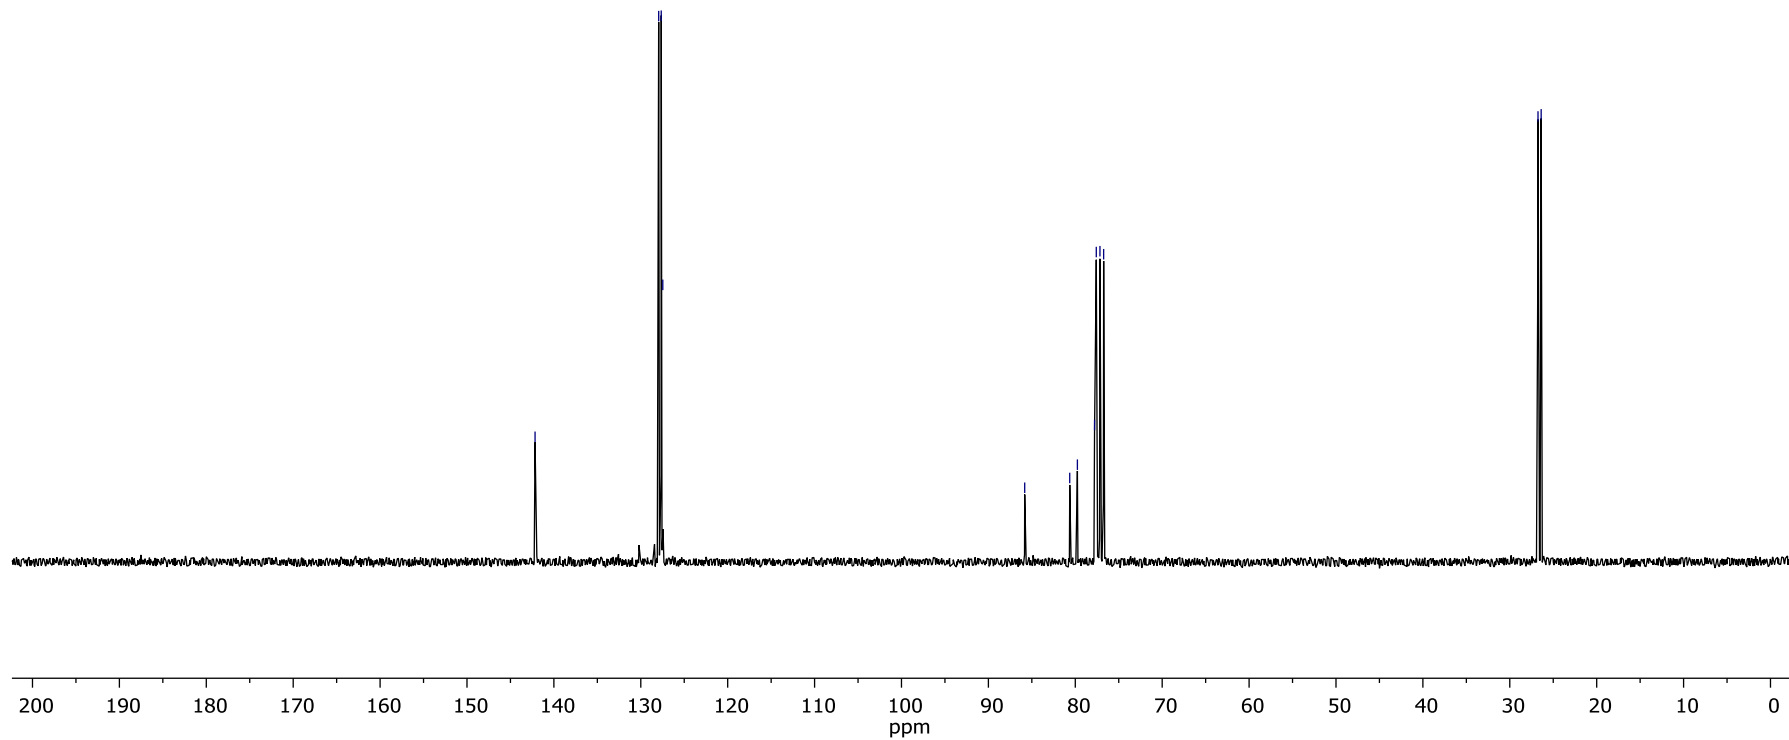

| Parameter                 | Value             |
|---------------------------|-------------------|
| 1 Title                   | EL1602.{1H}.1.fid |
| 2 Solvent                 | CDCl <sub>3</sub> |
| 3 Temperature             | 298.0             |
| 4 Pulse Sequence          | zg                |
| 5 Number of Scans         | 1                 |
| 6 Receiver Gain           | 32.0              |
| 7 Relaxation Delay        | 0.1000            |
| 8 Pulse Width             | 14.7000           |
| 9 Acquisition Time        | 2.7724            |
| 10 Spectrometer Frequency | 300.23            |
| 11 Spectral Width         | 5882.4            |
| 12 Lowest Frequency       | -1087.3           |
| 13 Nucleus                | <sup>1</sup> H    |
| 14 Acquired Size          | 16308             |
| 15 Spectral Size          | 65536             |

— 7.26

— 6.55

1.31  
1.21  
1.17

<sup>1</sup>H NMR (300.13 MHz, CDCl<sub>3</sub>)  
**2,6-di-tert-butyl-4-(tert-butylperoxy)-4-methylcyclohexa-2,5-dien-1-one 7**

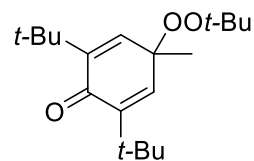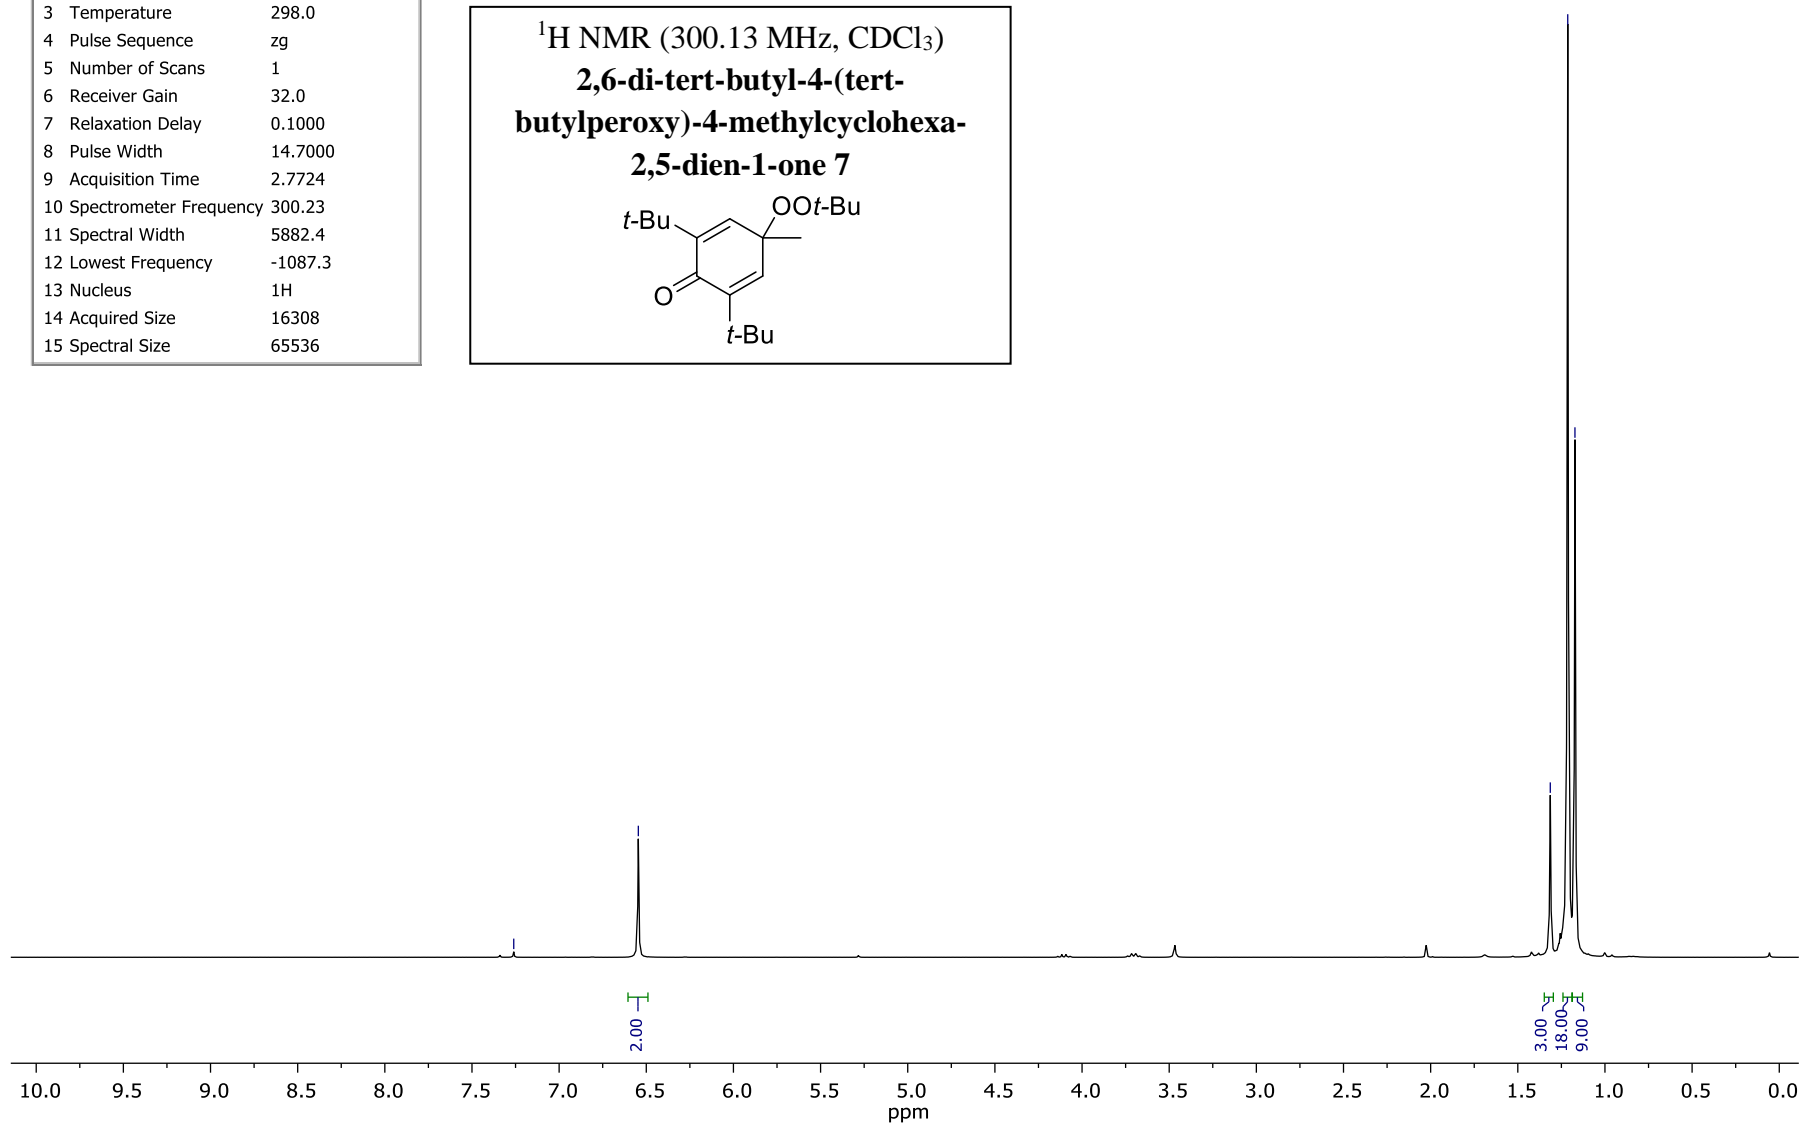

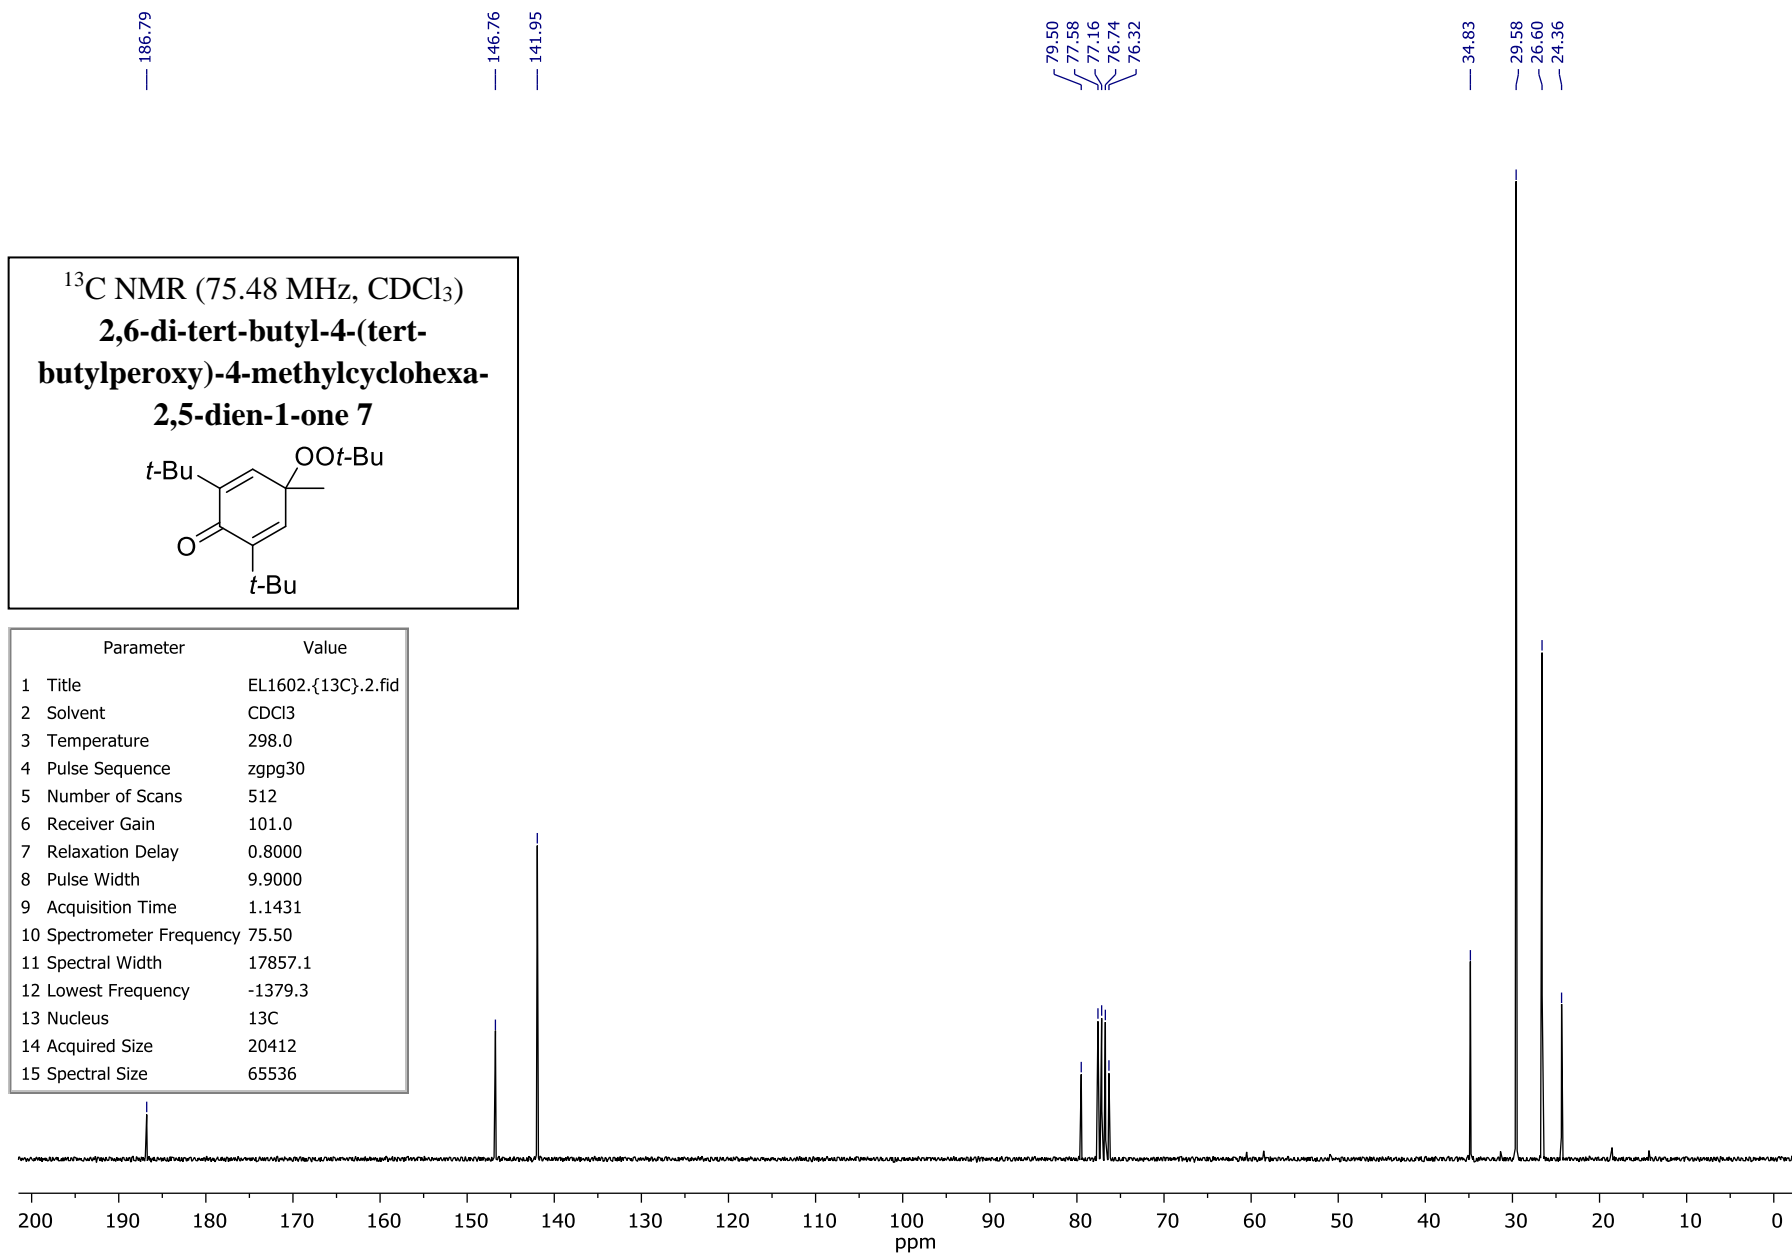

i8051.{1H}.1.fid  
 Avance-300, CDCl<sub>3</sub>

7.23  
 7.22  
 7.21  
 7.00  
 6.99  
 6.99  
 6.98  
 6.97

3.26  
 3.10

1.23

| Parameter                | Value             |
|--------------------------|-------------------|
| 1 Title                  | i8051.{1H}.1.fid  |
| 2 Solvent                | CDCl <sub>3</sub> |
| 3 Temperature            | 296.2             |
| 4 Pulse Sequence         | zg                |
| 5 Number of Scans        | 1                 |
| 6 Receiver Gain          | 12.7              |
| 7 Relaxation Delay       | 0.0050            |
| 8 Pulse Width            | 9.0000            |
| 9 Spectrometer Frequency | 300.13            |
| 10 Spectral Width        | 6009.6            |
| 11 Lowest Frequency      | -610.2            |
| 12 Nucleus               | <sup>1</sup> H    |
| 13 Acquired Size         | 8124              |
| 14 Spectral Size         | 65536             |

<sup>1</sup>H NMR (300.13 MHz, CDCl<sub>3</sub>)  
**5-benzyl-5-(tert-butylperoxy)-  
 1,3-dimethylpyrimidine-  
 2,4,6(1H,3H,5H)-trione 9a**

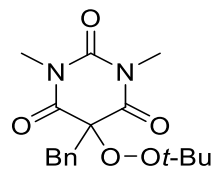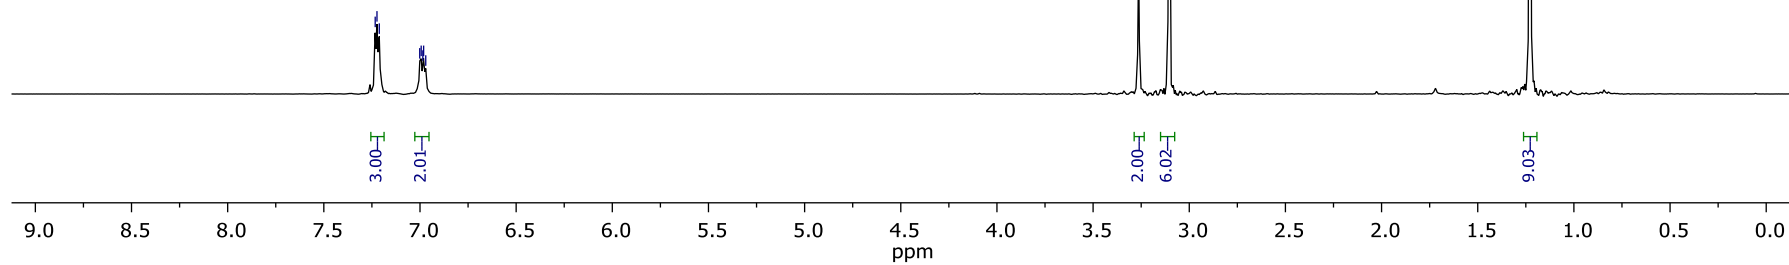



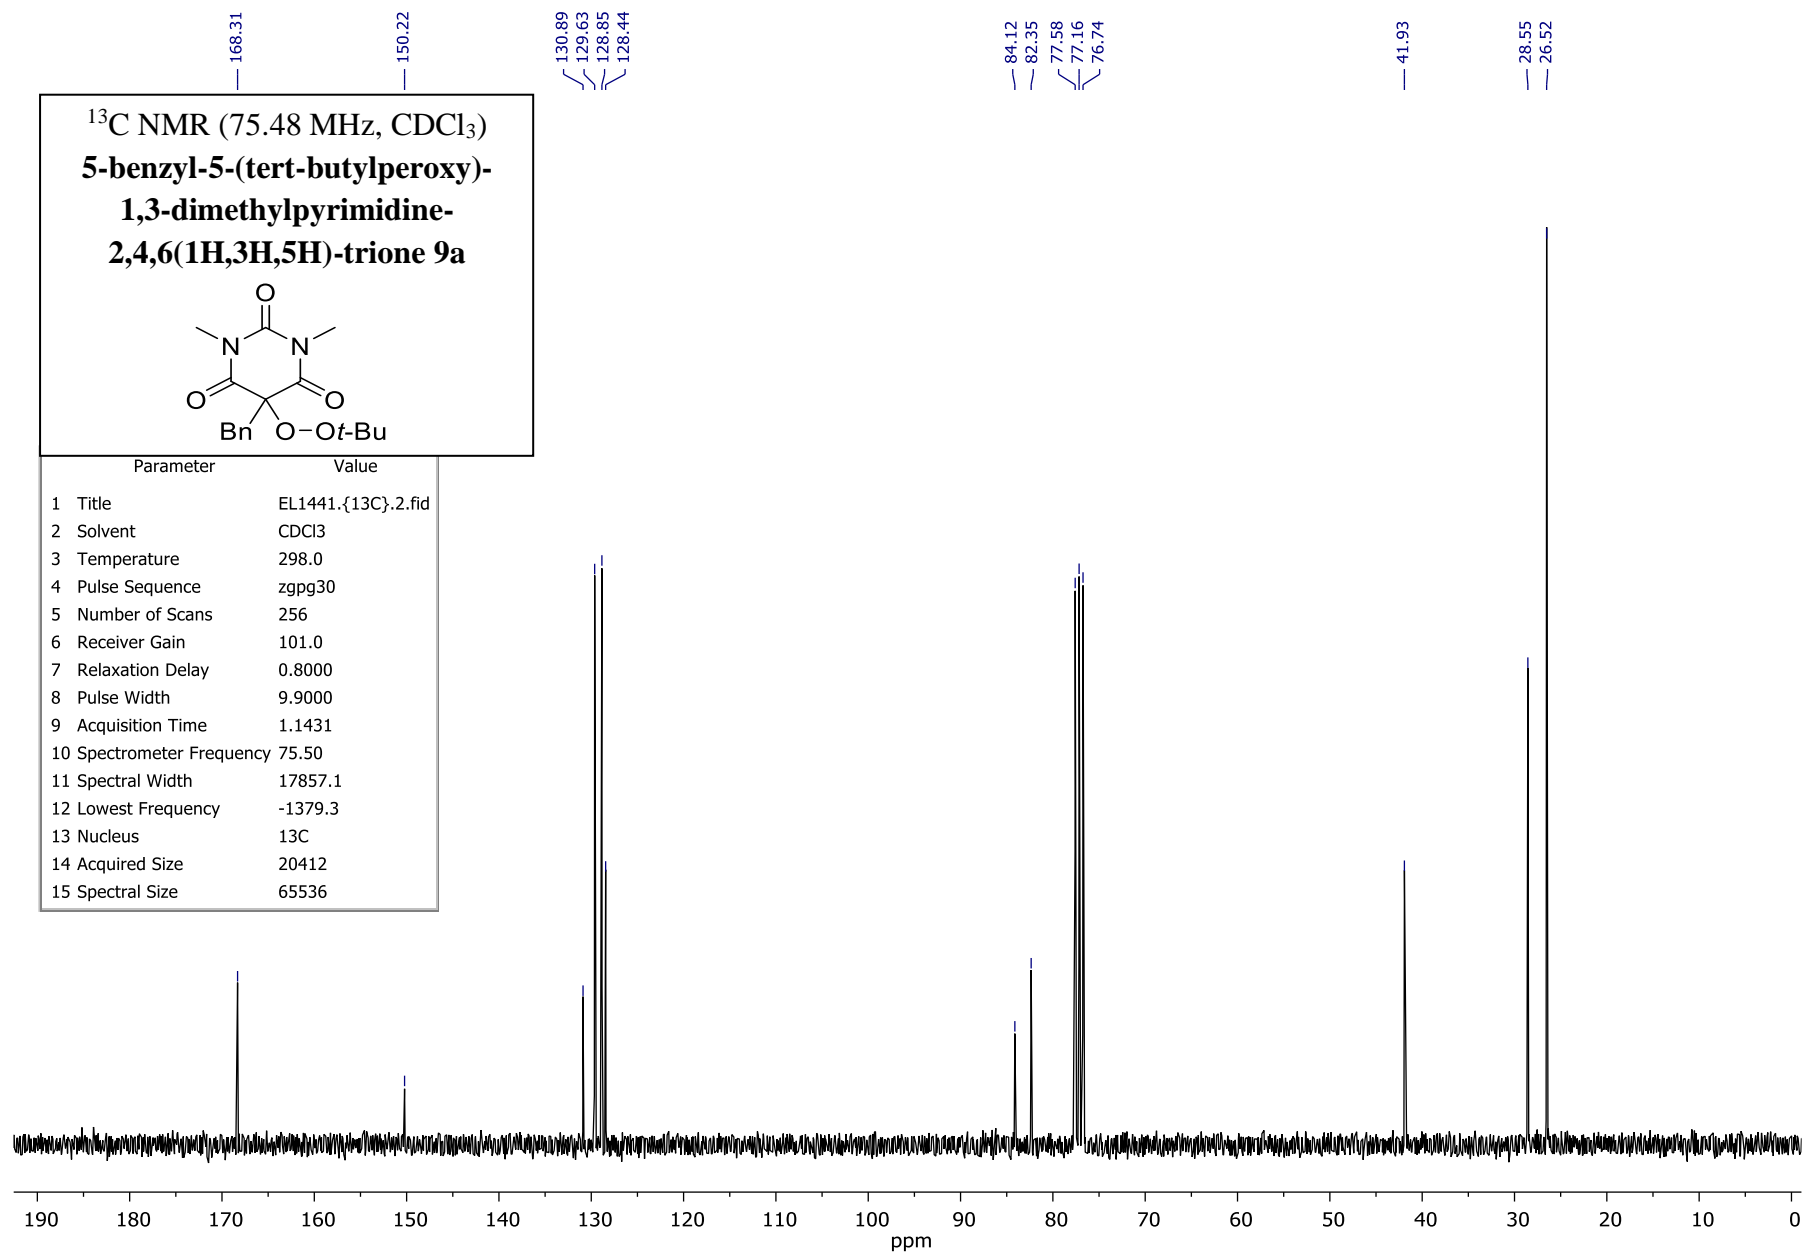

EL152.{1H}.1.fid  
Avance-300, CDCl<sub>3</sub>

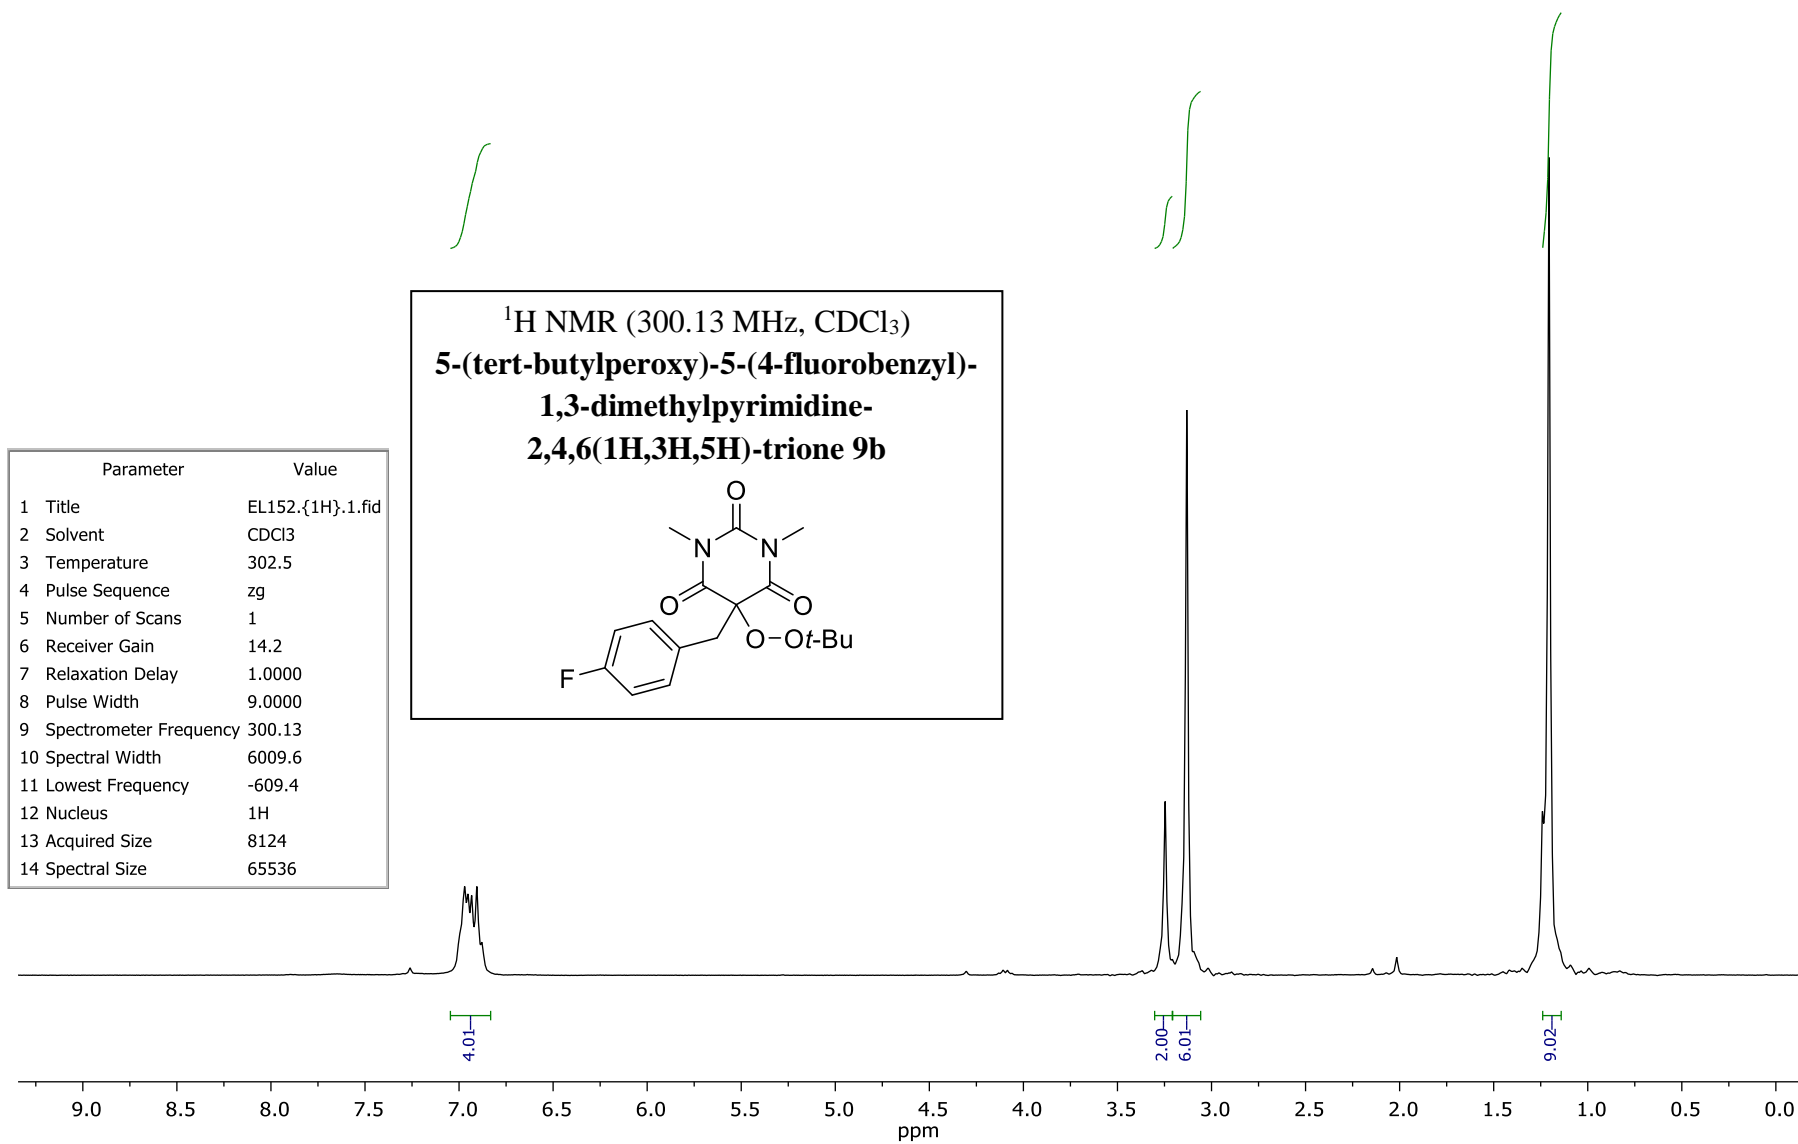

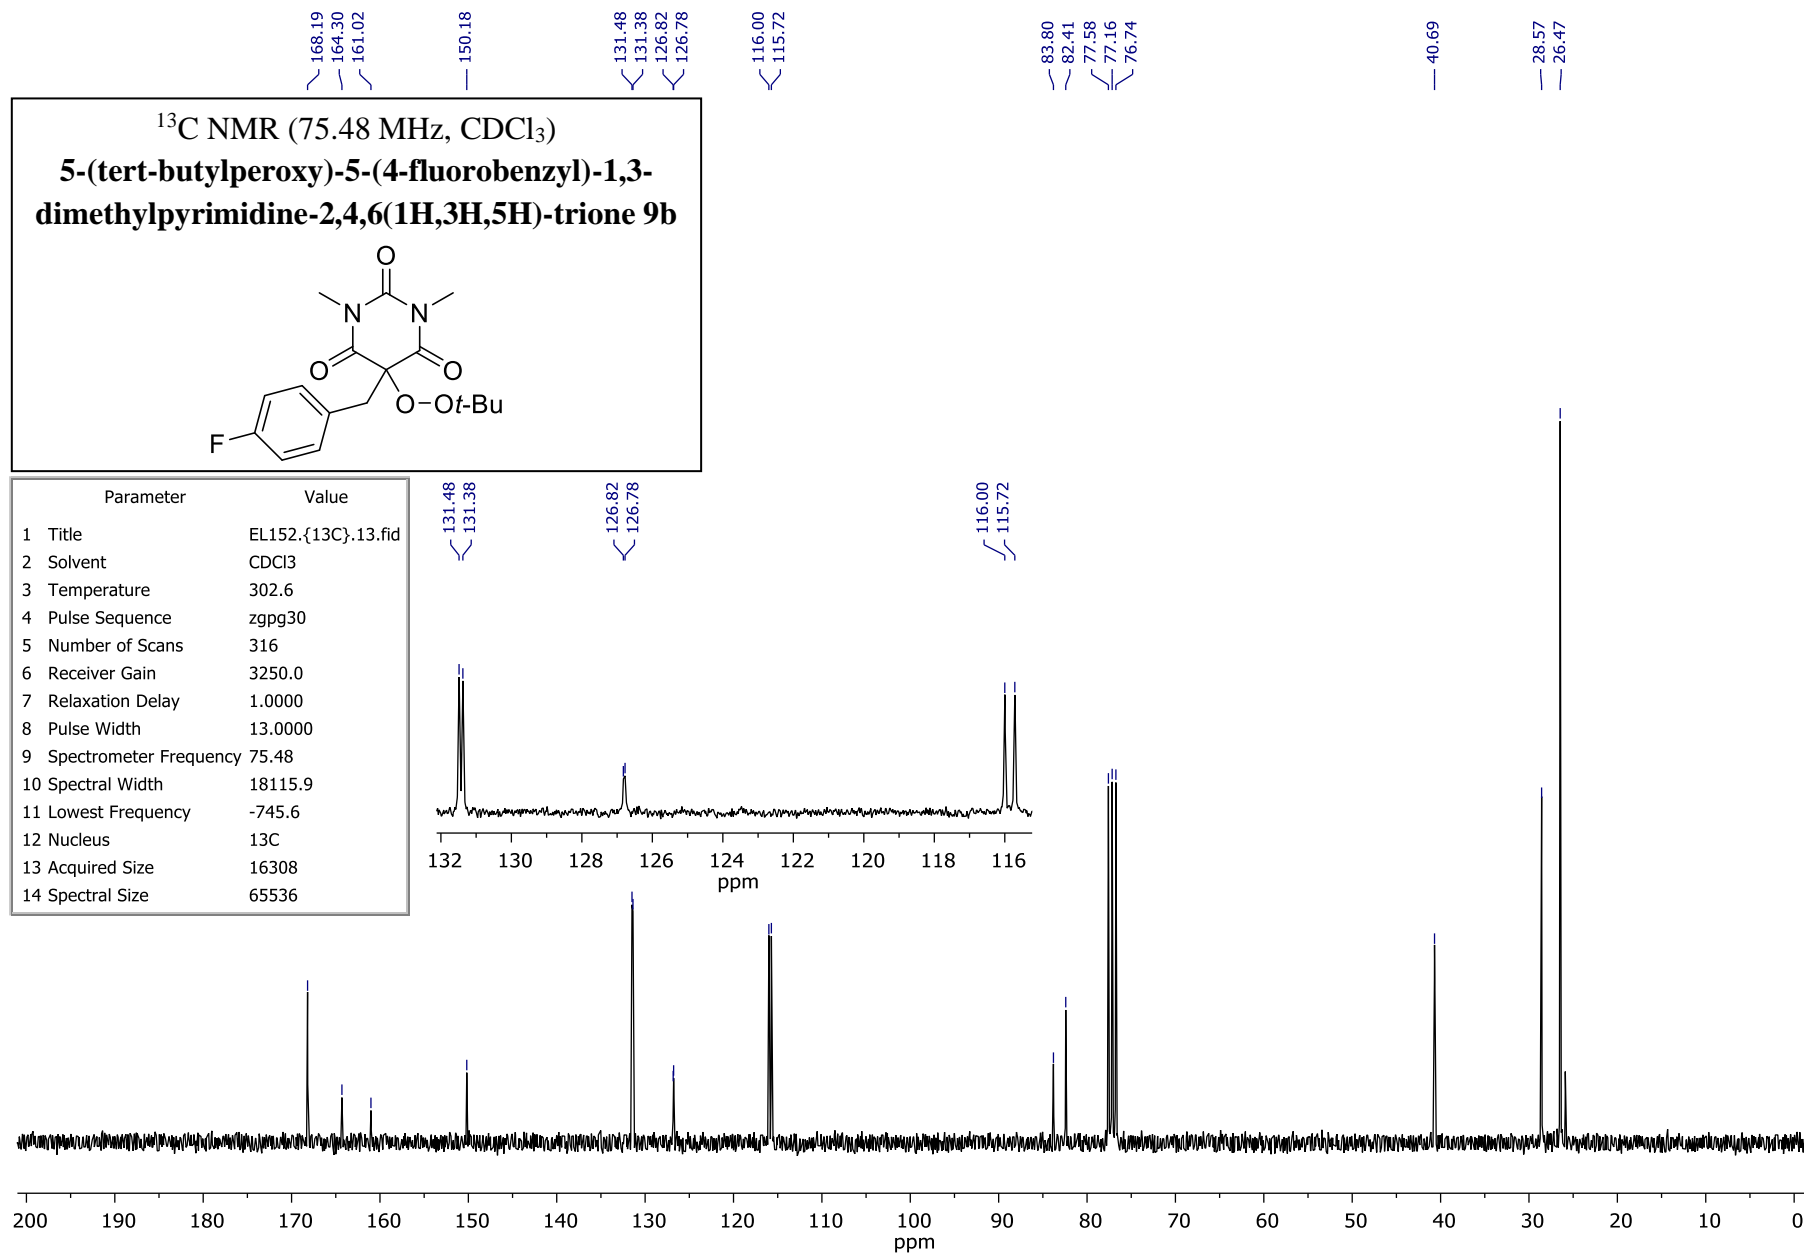

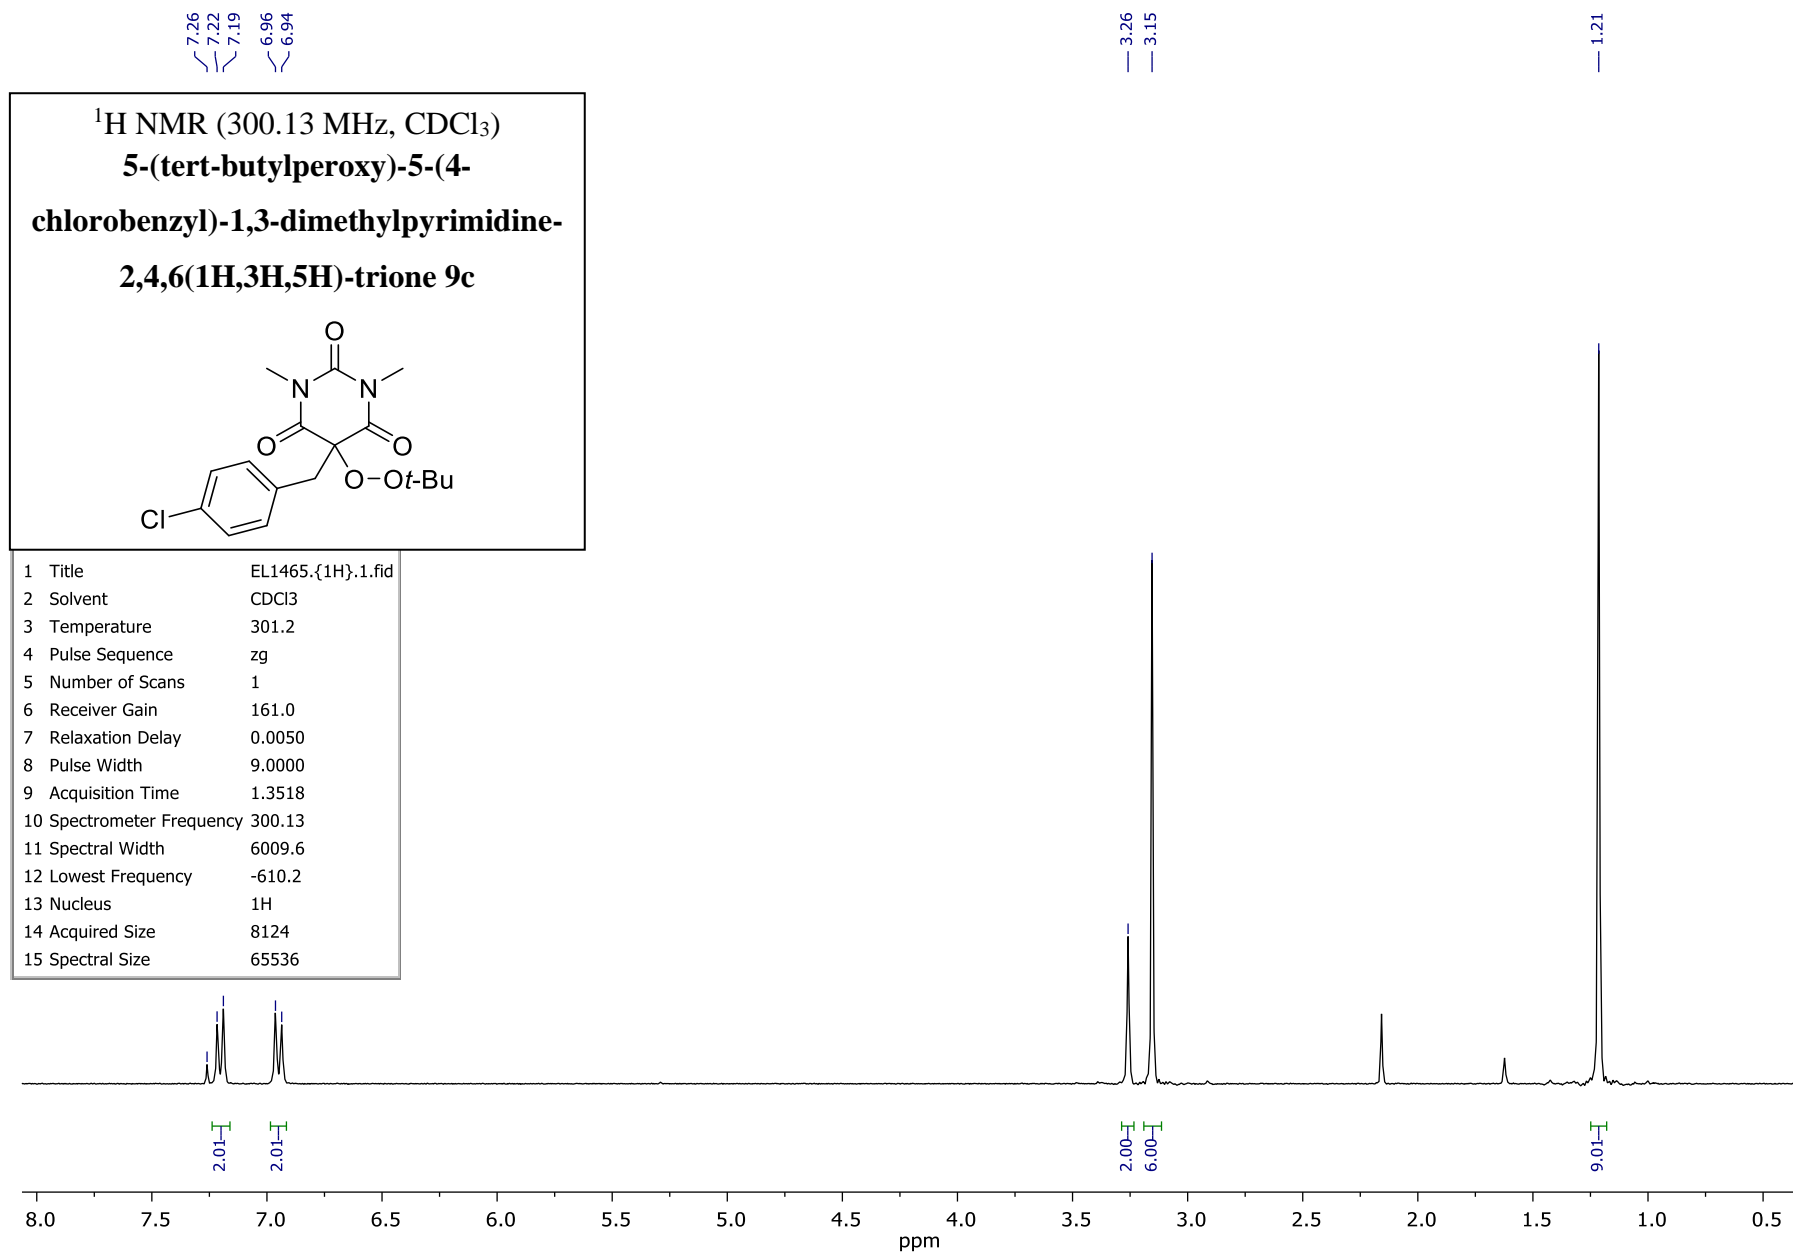

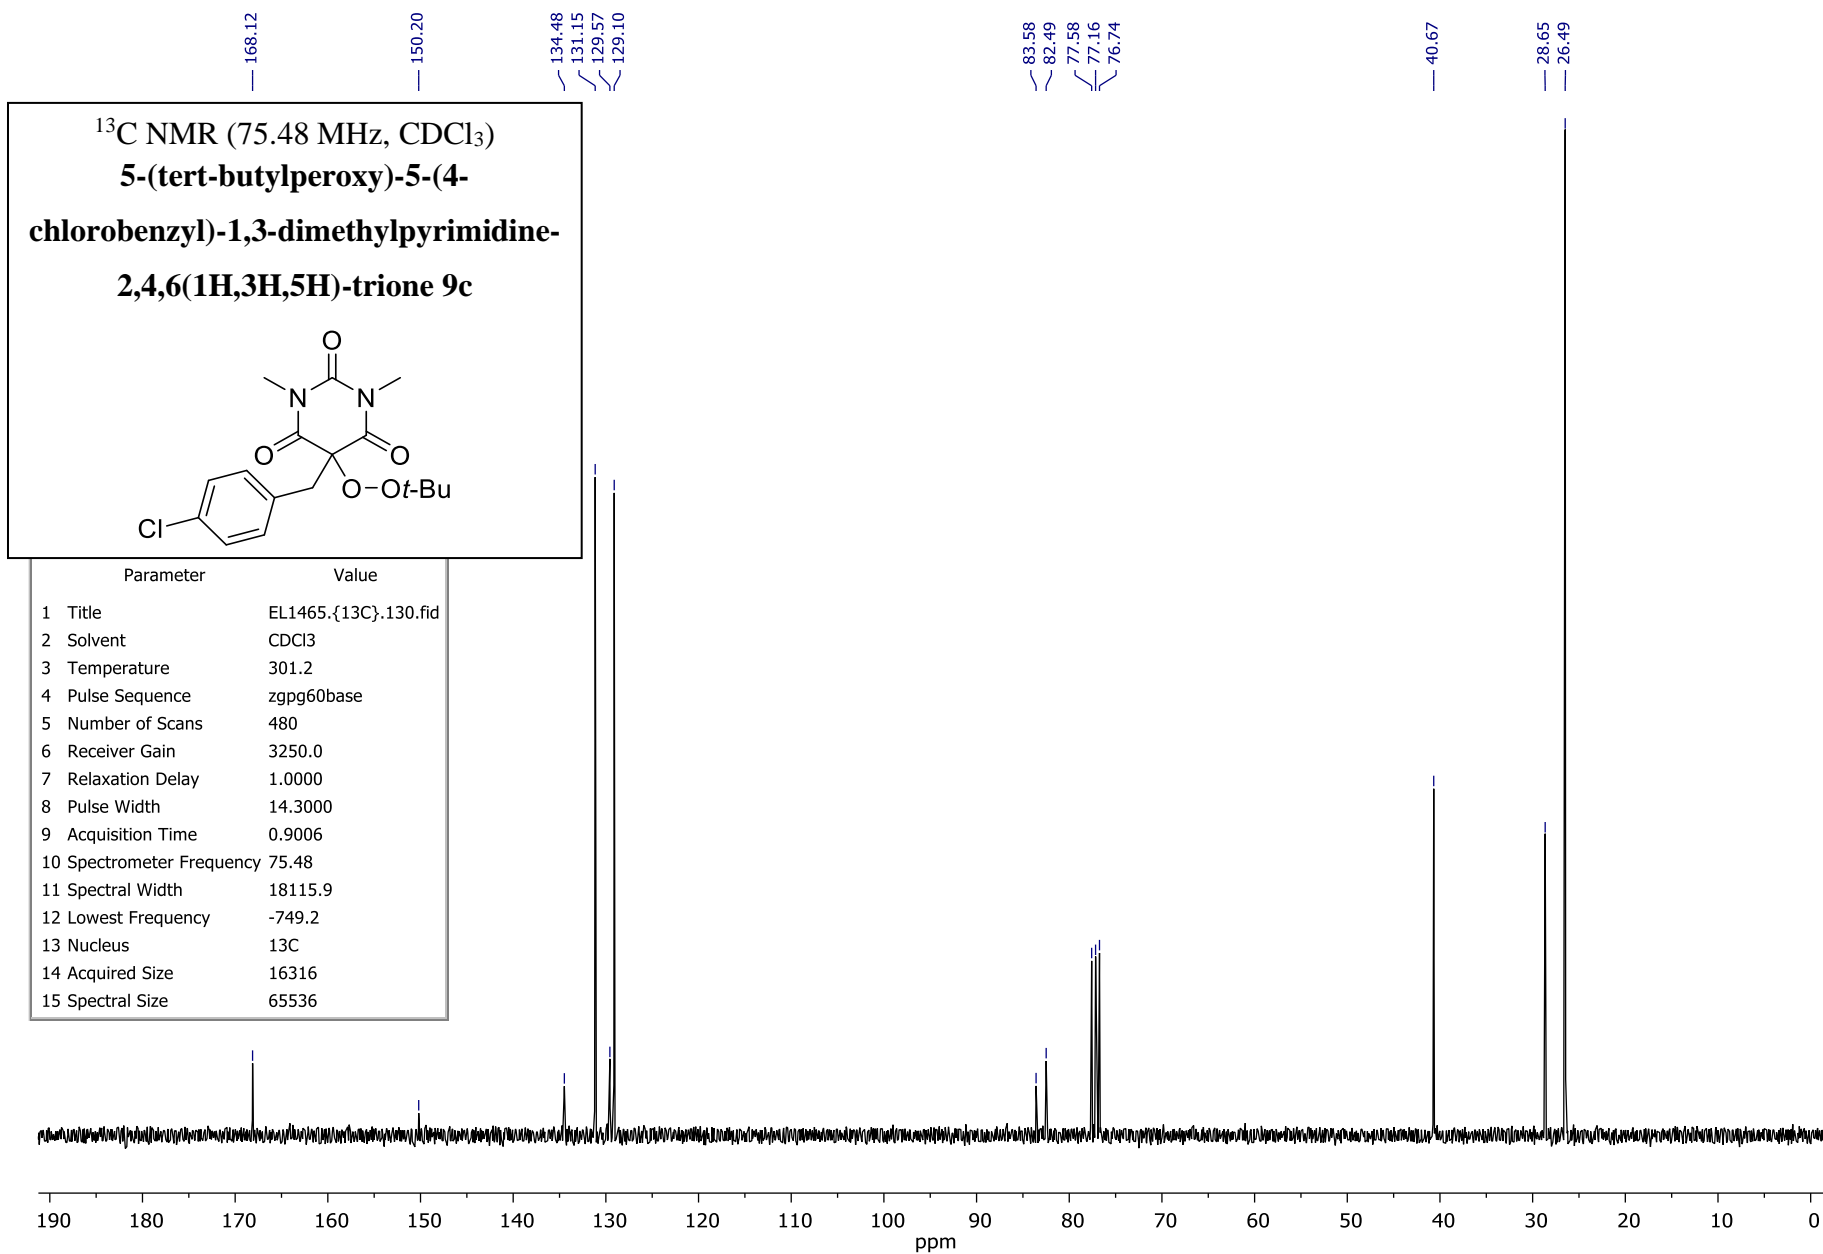

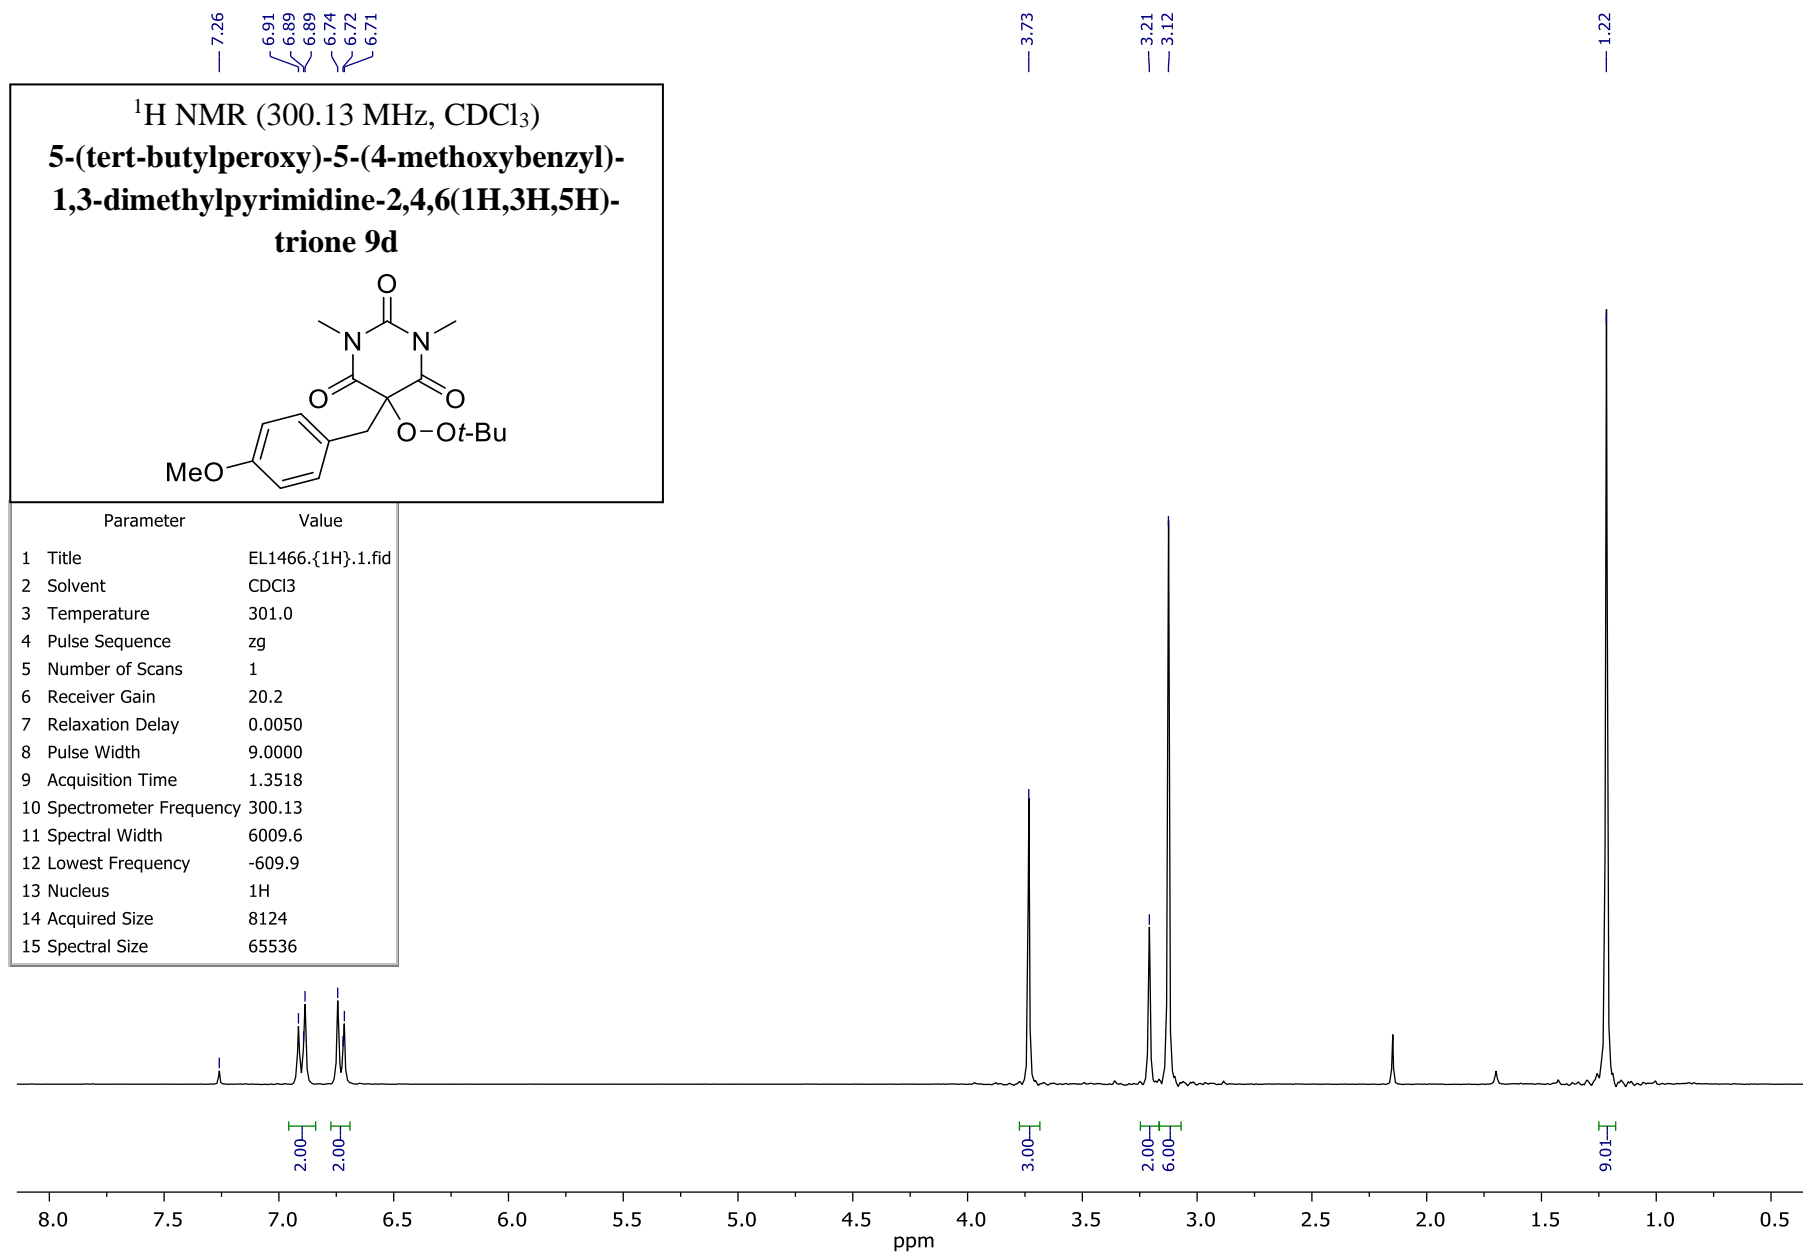

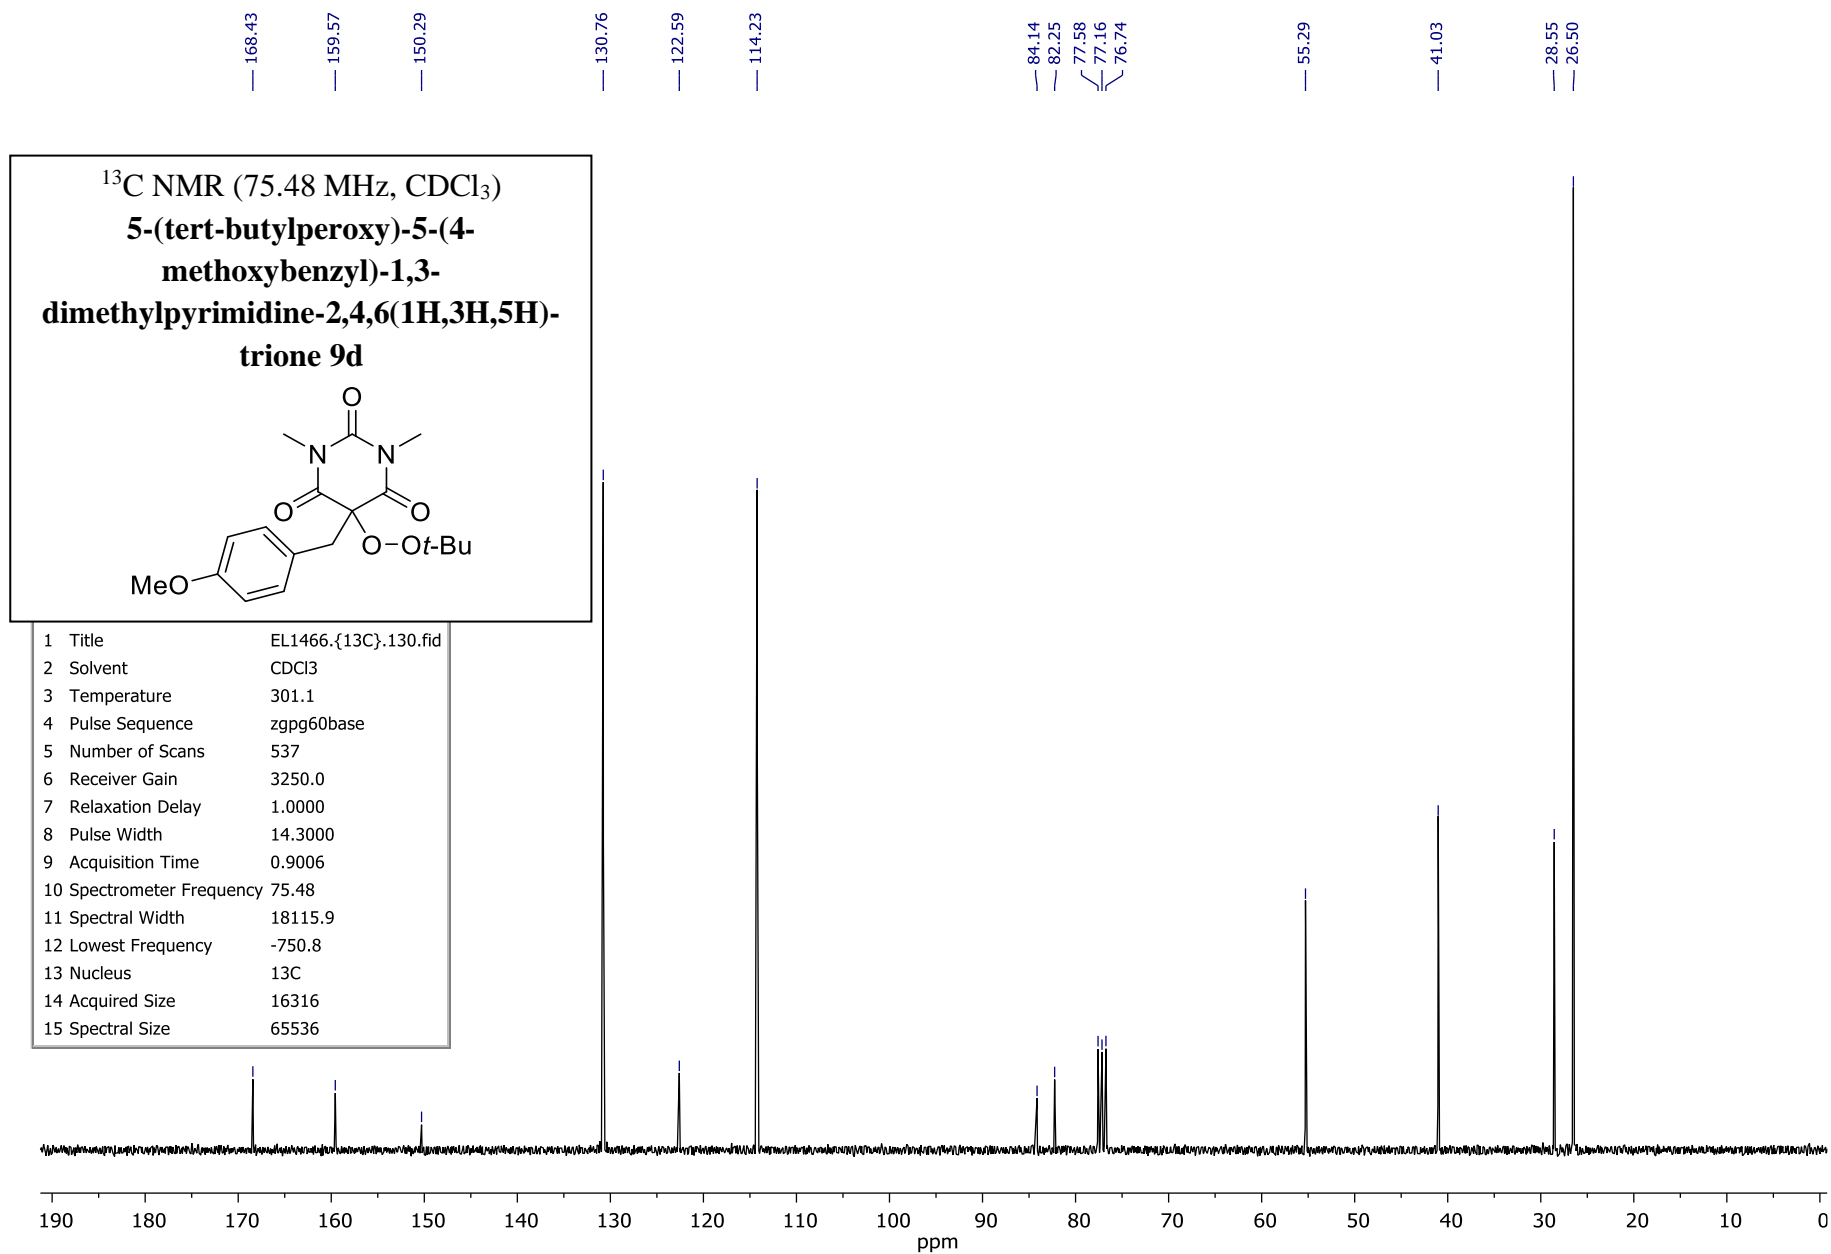

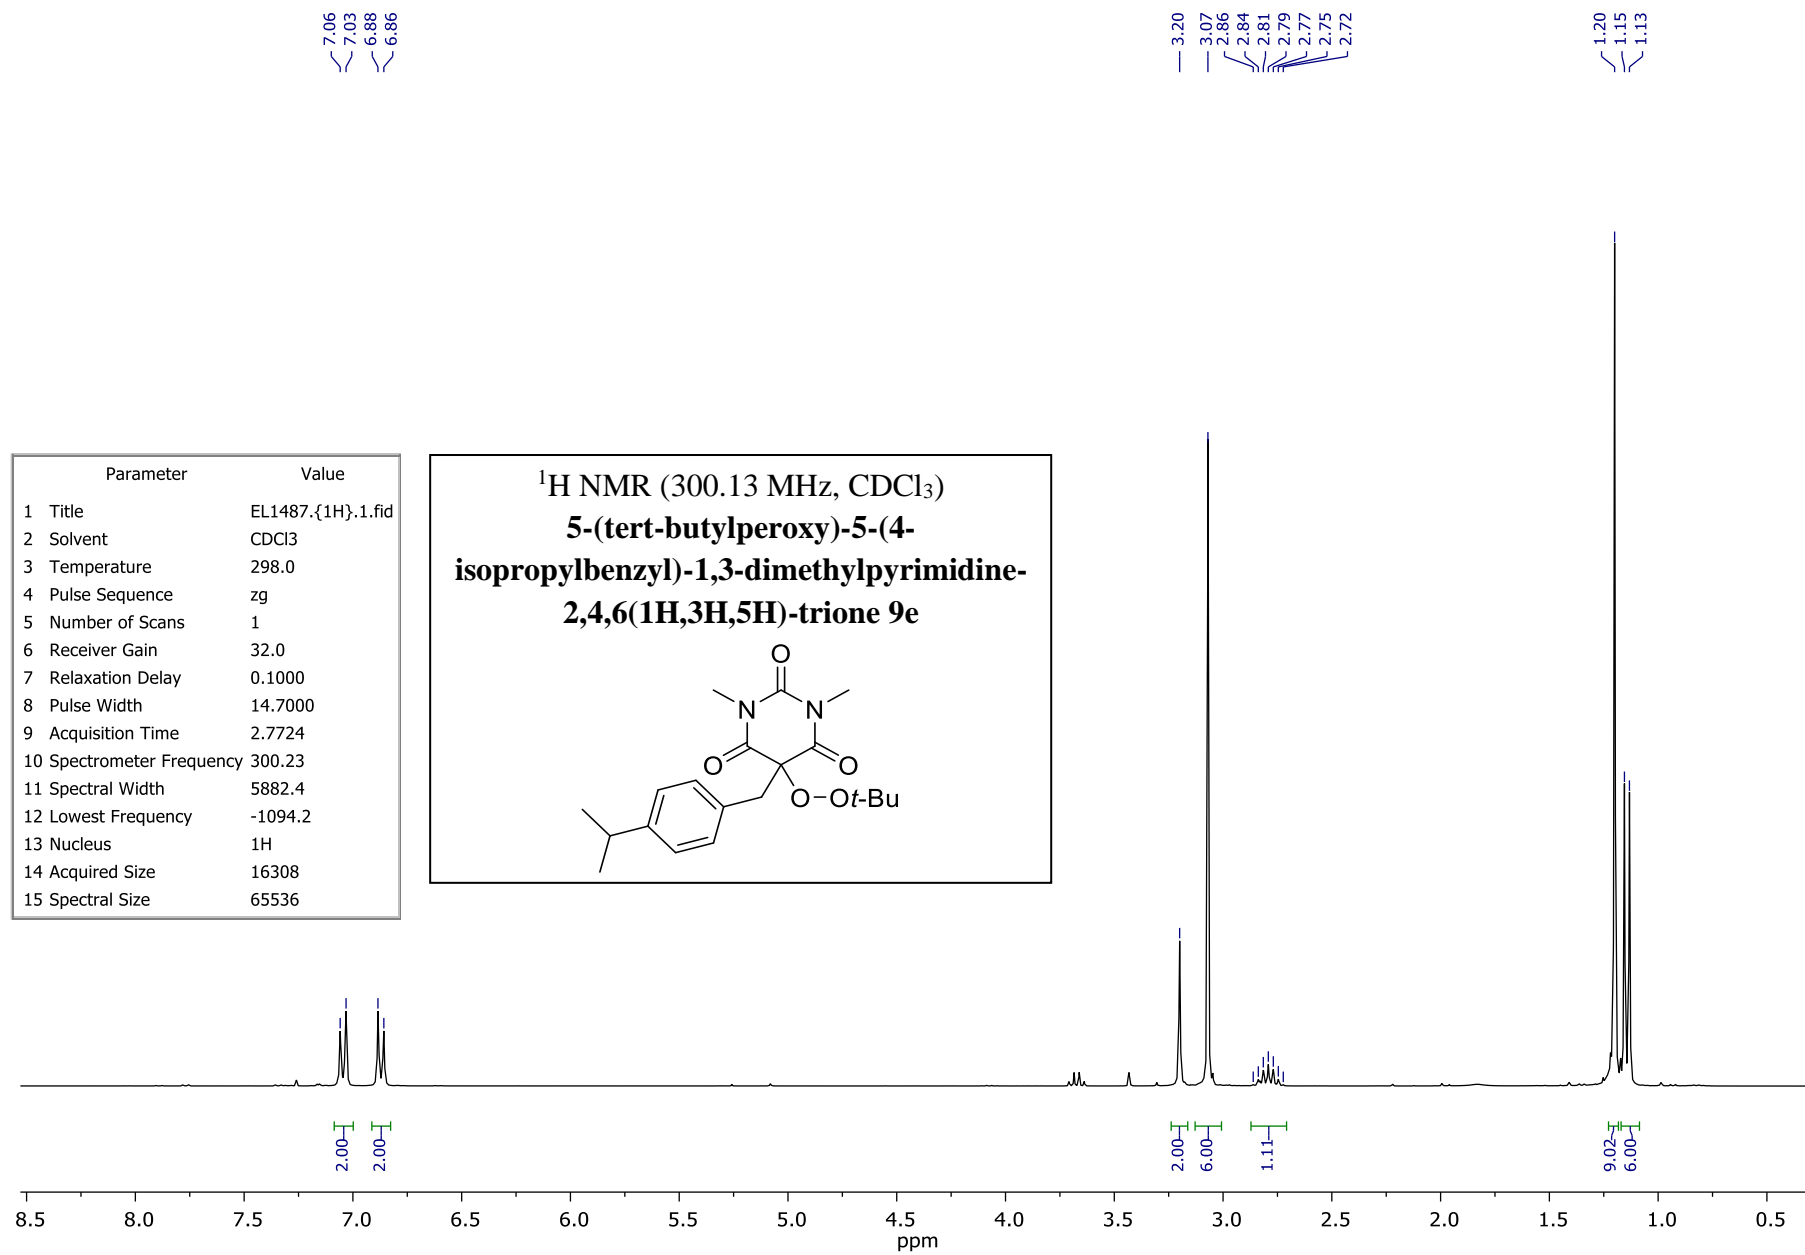



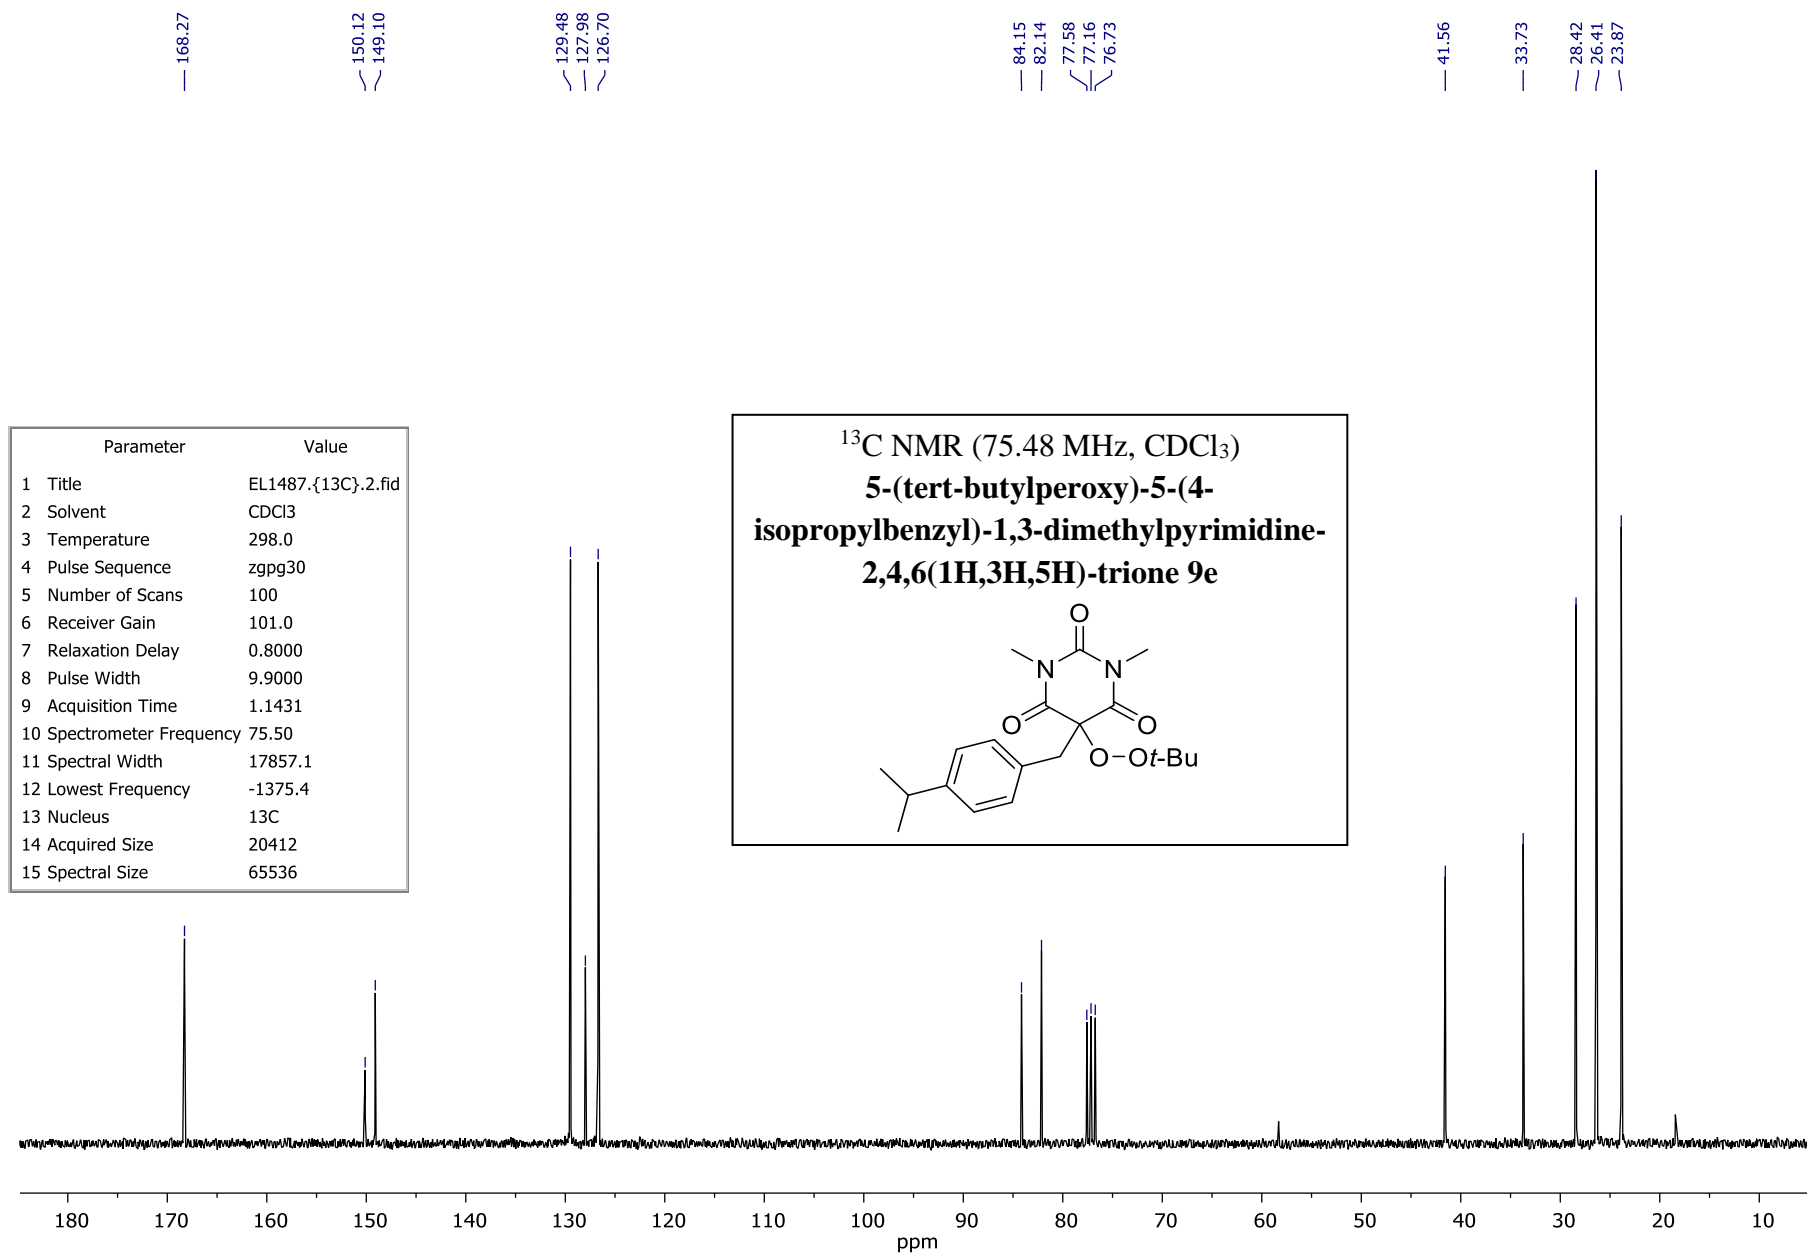

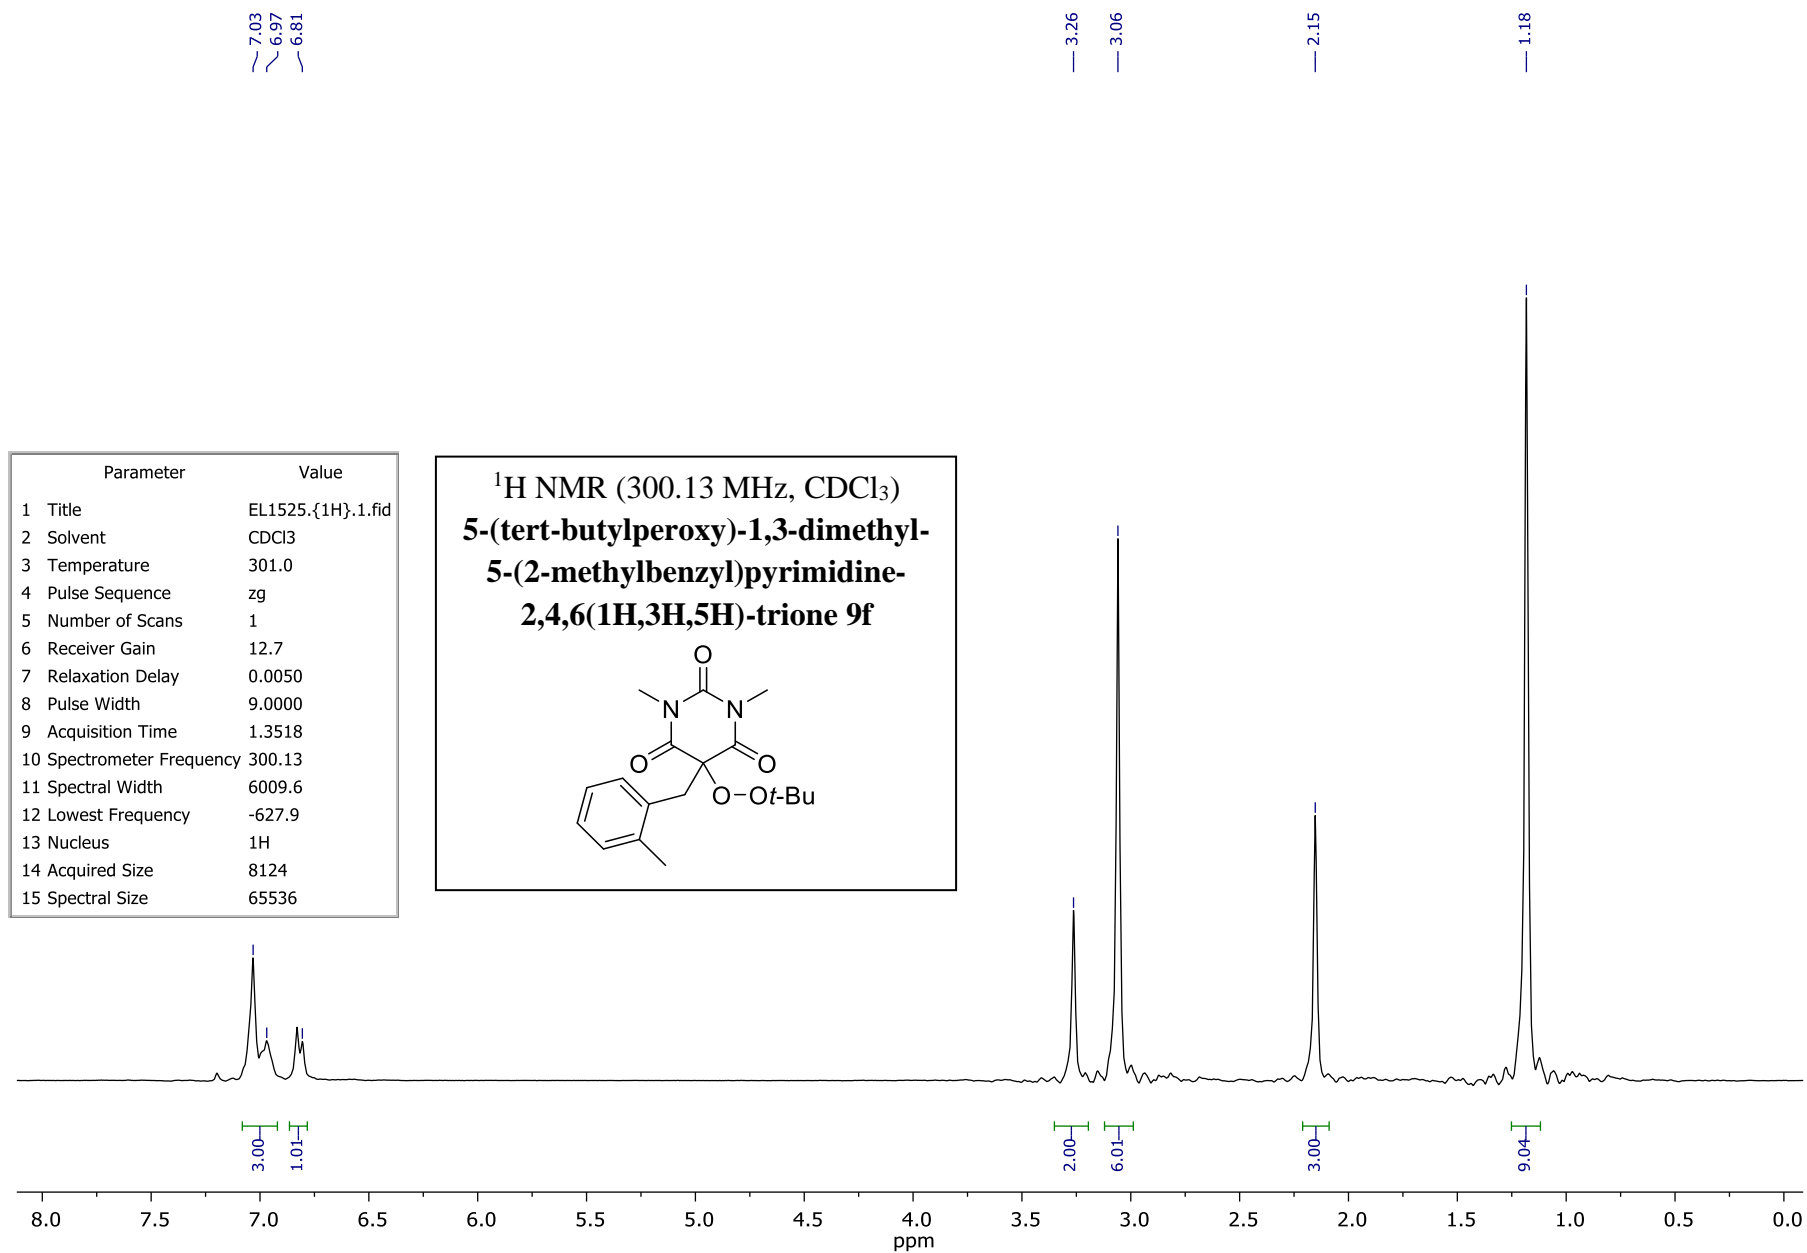

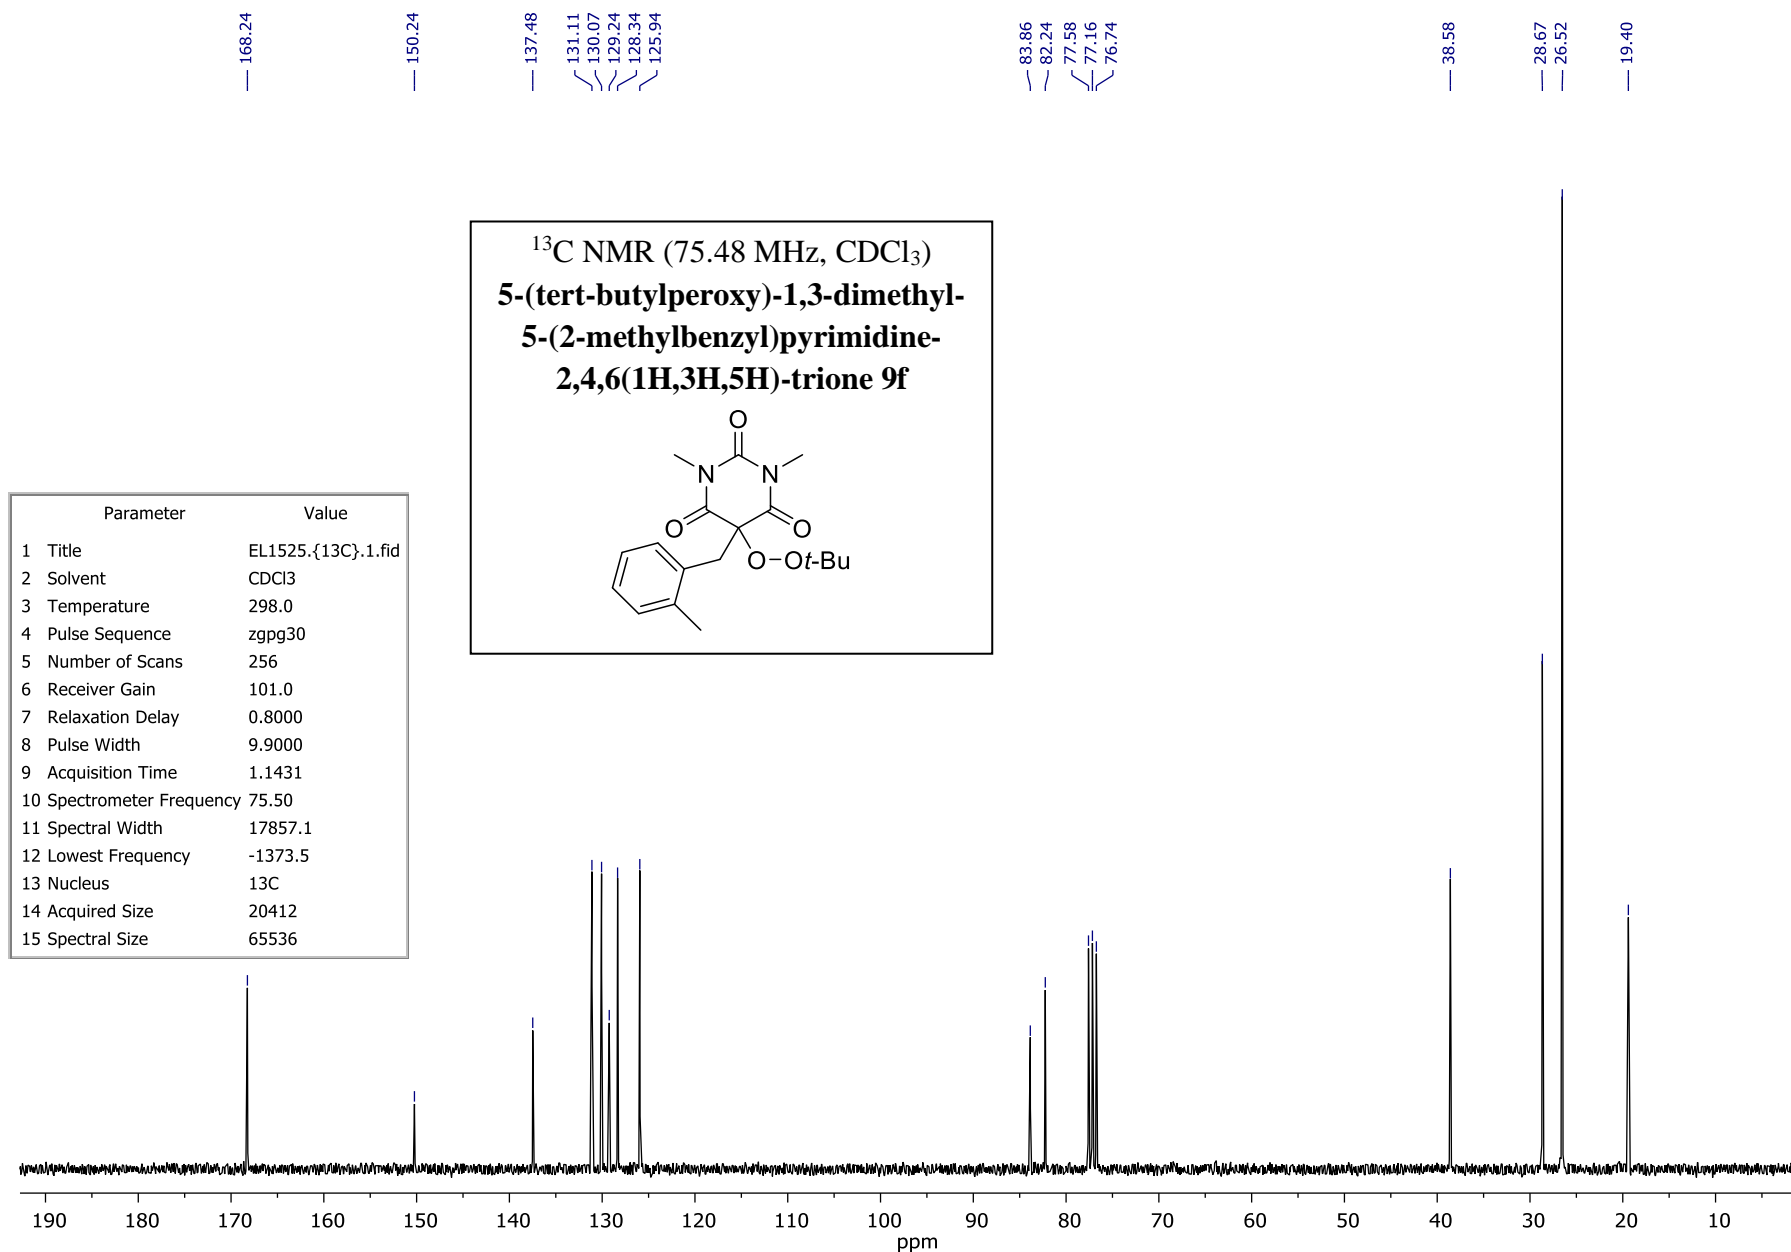

EL043.{1H}.1.fid  
 Avance-300, CDCl<sub>3</sub>

8.00  
 7.97  
 7.60  
 7.58  
 7.55  
 7.49  
 7.46  
 7.43  
 7.41  
 7.26

3.66  
 3.28  
 3.26

1.17  
 1.15

| Parameter                | Value             |
|--------------------------|-------------------|
| 1 Title                  | EL043.{1H}.1.fid  |
| 2 Solvent                | CDCl <sub>3</sub> |
| 3 Temperature            | 304.3             |
| 4 Pulse Sequence         | zg                |
| 5 Number of Scans        | 1                 |
| 6 Receiver Gain          | 50.8              |
| 7 Relaxation Delay       | 0.0050            |
| 8 Pulse Width            | 9.0000            |
| 9 Spectrometer Frequency | 300.13            |
| 10 Spectral Width        | 6009.6            |
| 11 Lowest Frequency      | -619.0            |
| 12 Nucleus               | <sup>1</sup> H    |
| 13 Acquired Size         | 8124              |
| 14 Spectral Size         | 65536             |

<sup>1</sup>H NMR (300.13 MHz, CDCl<sub>3</sub>)  
**5-(tert-butylperoxy)-1,3-dimethyl-5-(2-nitrobenzyl)pyrimidine-2,4,6(1H,3H,5H)-trione 9g**

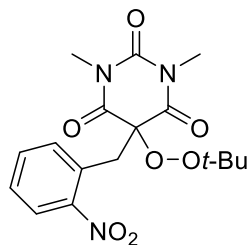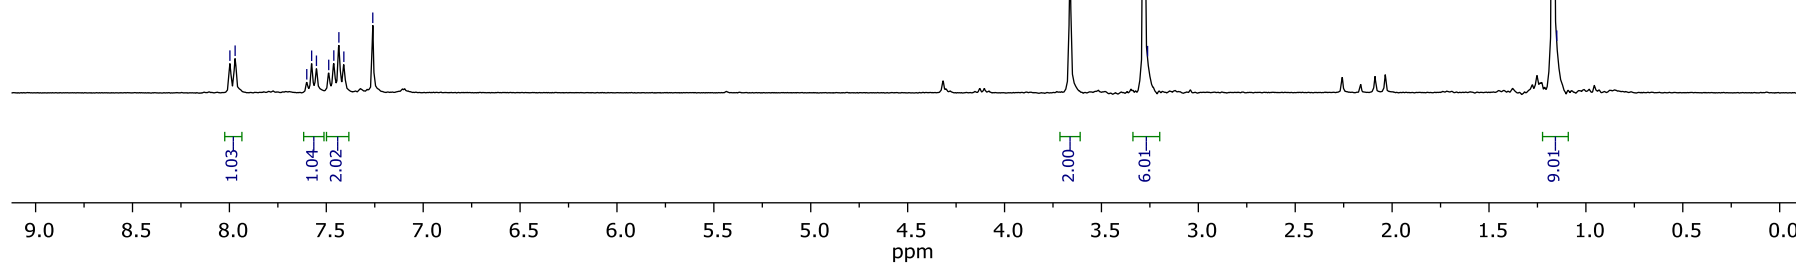

EL043.{13C}.13.fid  
/LB58 IYT1588

167.31

150.67  
149.47

134.44  
132.86  
129.19  
128.22  
125.24

82.62  
81.72  
77.58  
77.16  
76.74

38.55

29.09  
26.52

<sup>13</sup>C NMR (75.48 MHz, CDCl<sub>3</sub>)

**5-(tert-butylperoxy)-1,3-dimethyl-  
5-(2-nitrobenzyl)pyrimidine-  
2,4,6(1H,3H,5H)-trione 9g**

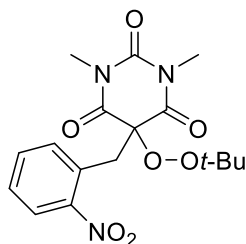

| Parameter                | Value              |
|--------------------------|--------------------|
| 1 Title                  | EL043.{13C}.13.fid |
| 2 Solvent                | CDCl <sub>3</sub>  |
| 3 Temperature            | 304.2              |
| 4 Pulse Sequence         | zgpg30             |
| 5 Number of Scans        | 541                |
| 6 Receiver Gain          | 3250.0             |
| 7 Relaxation Delay       | 1.0000             |
| 8 Pulse Width            | 13.0000            |
| 9 Spectrometer Frequency | 75.48              |
| 10 Spectral Width        | 18115.9            |
| 11 Lowest Frequency      | -748.4             |
| 12 Nucleus               | <sup>13</sup> C    |
| 13 Acquired Size         | 16308              |
| 14 Spectral Size         | 65536              |

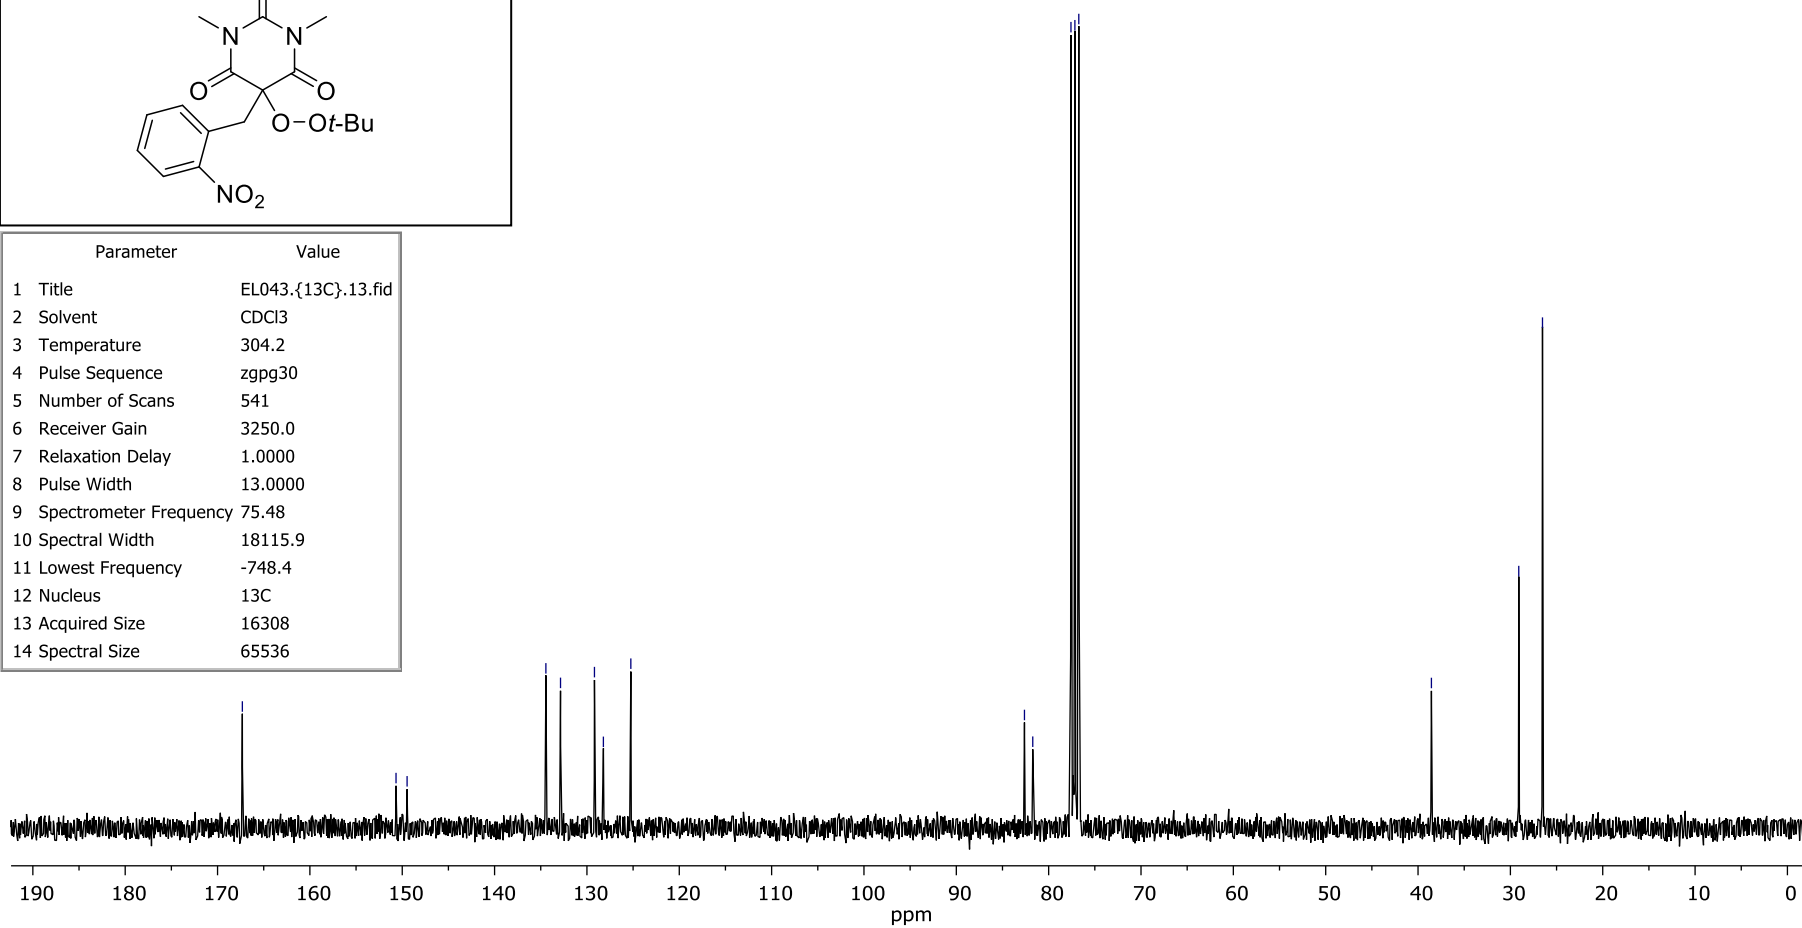

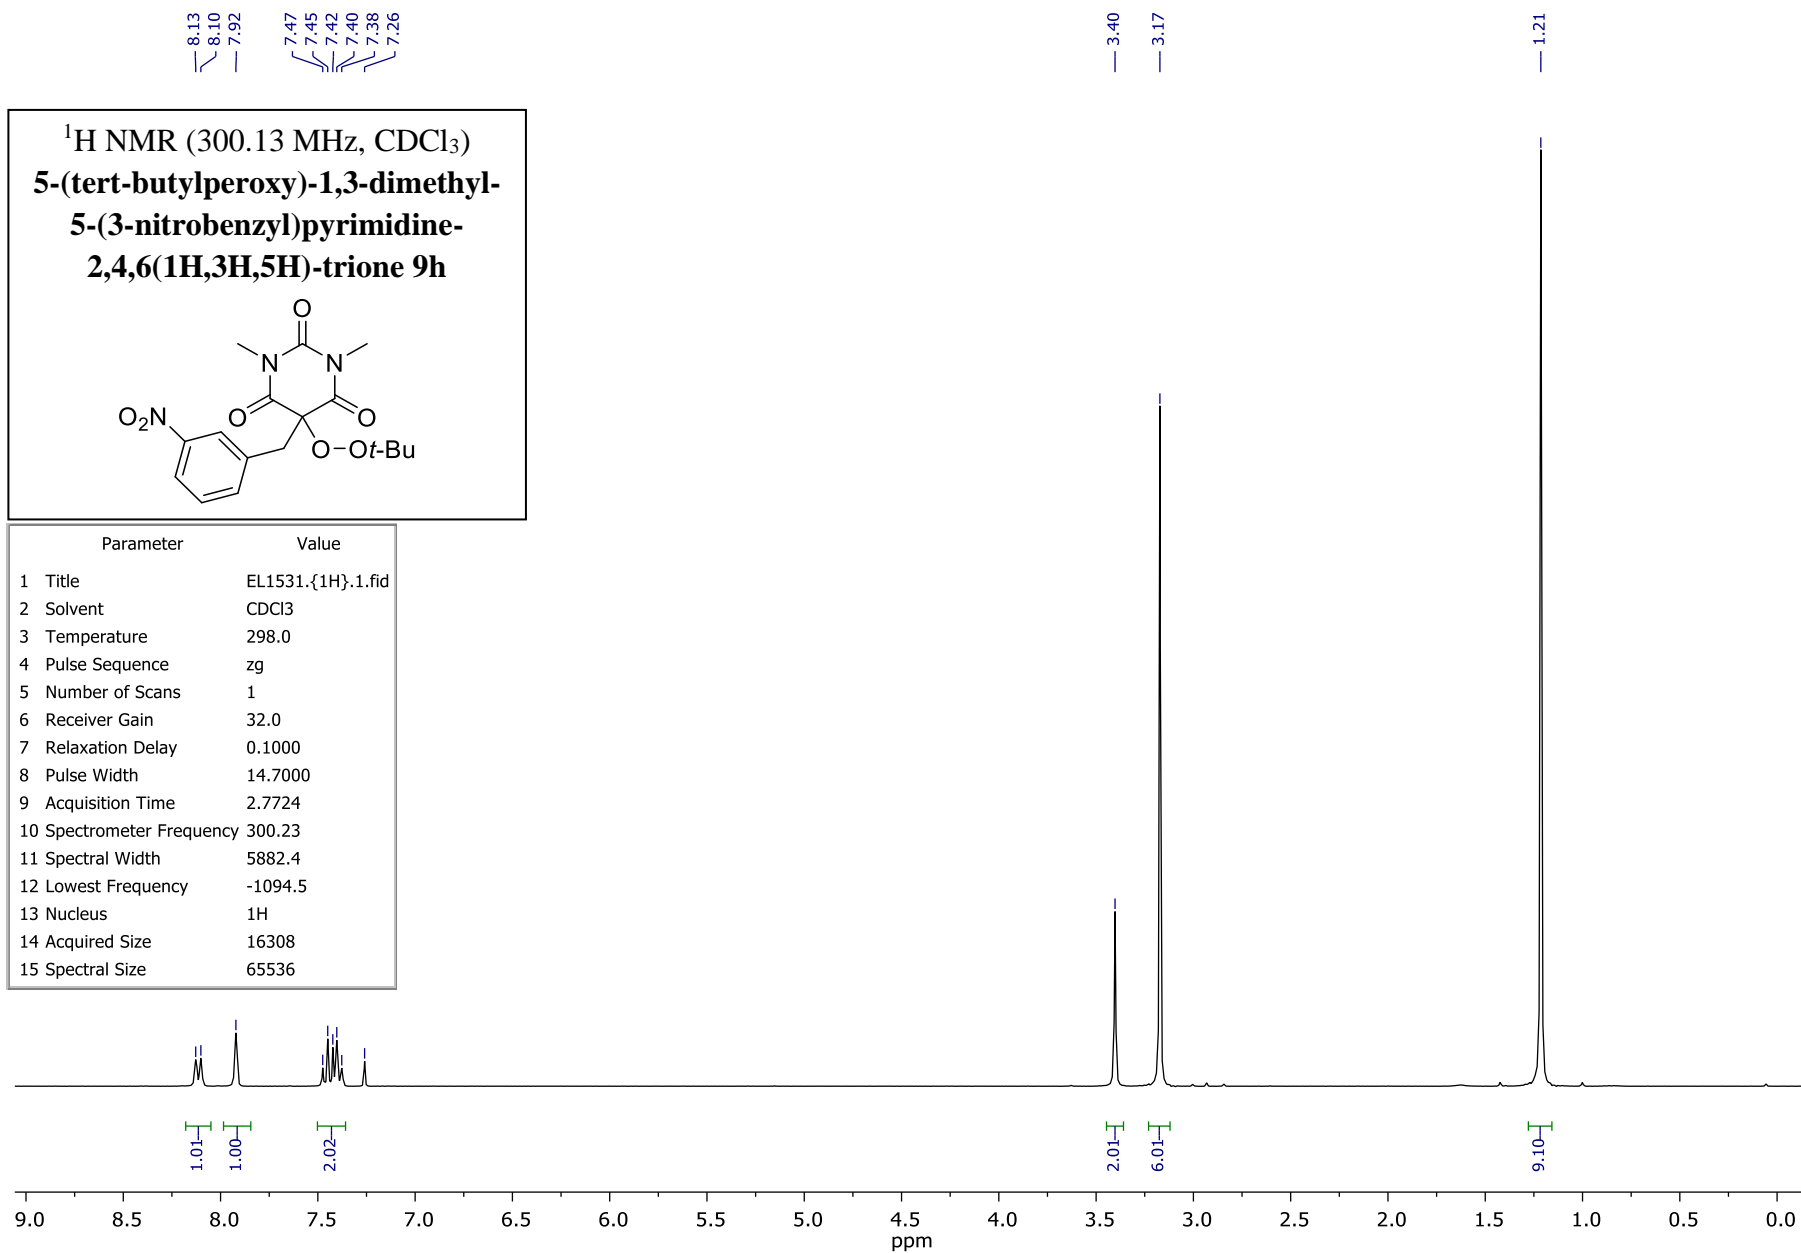

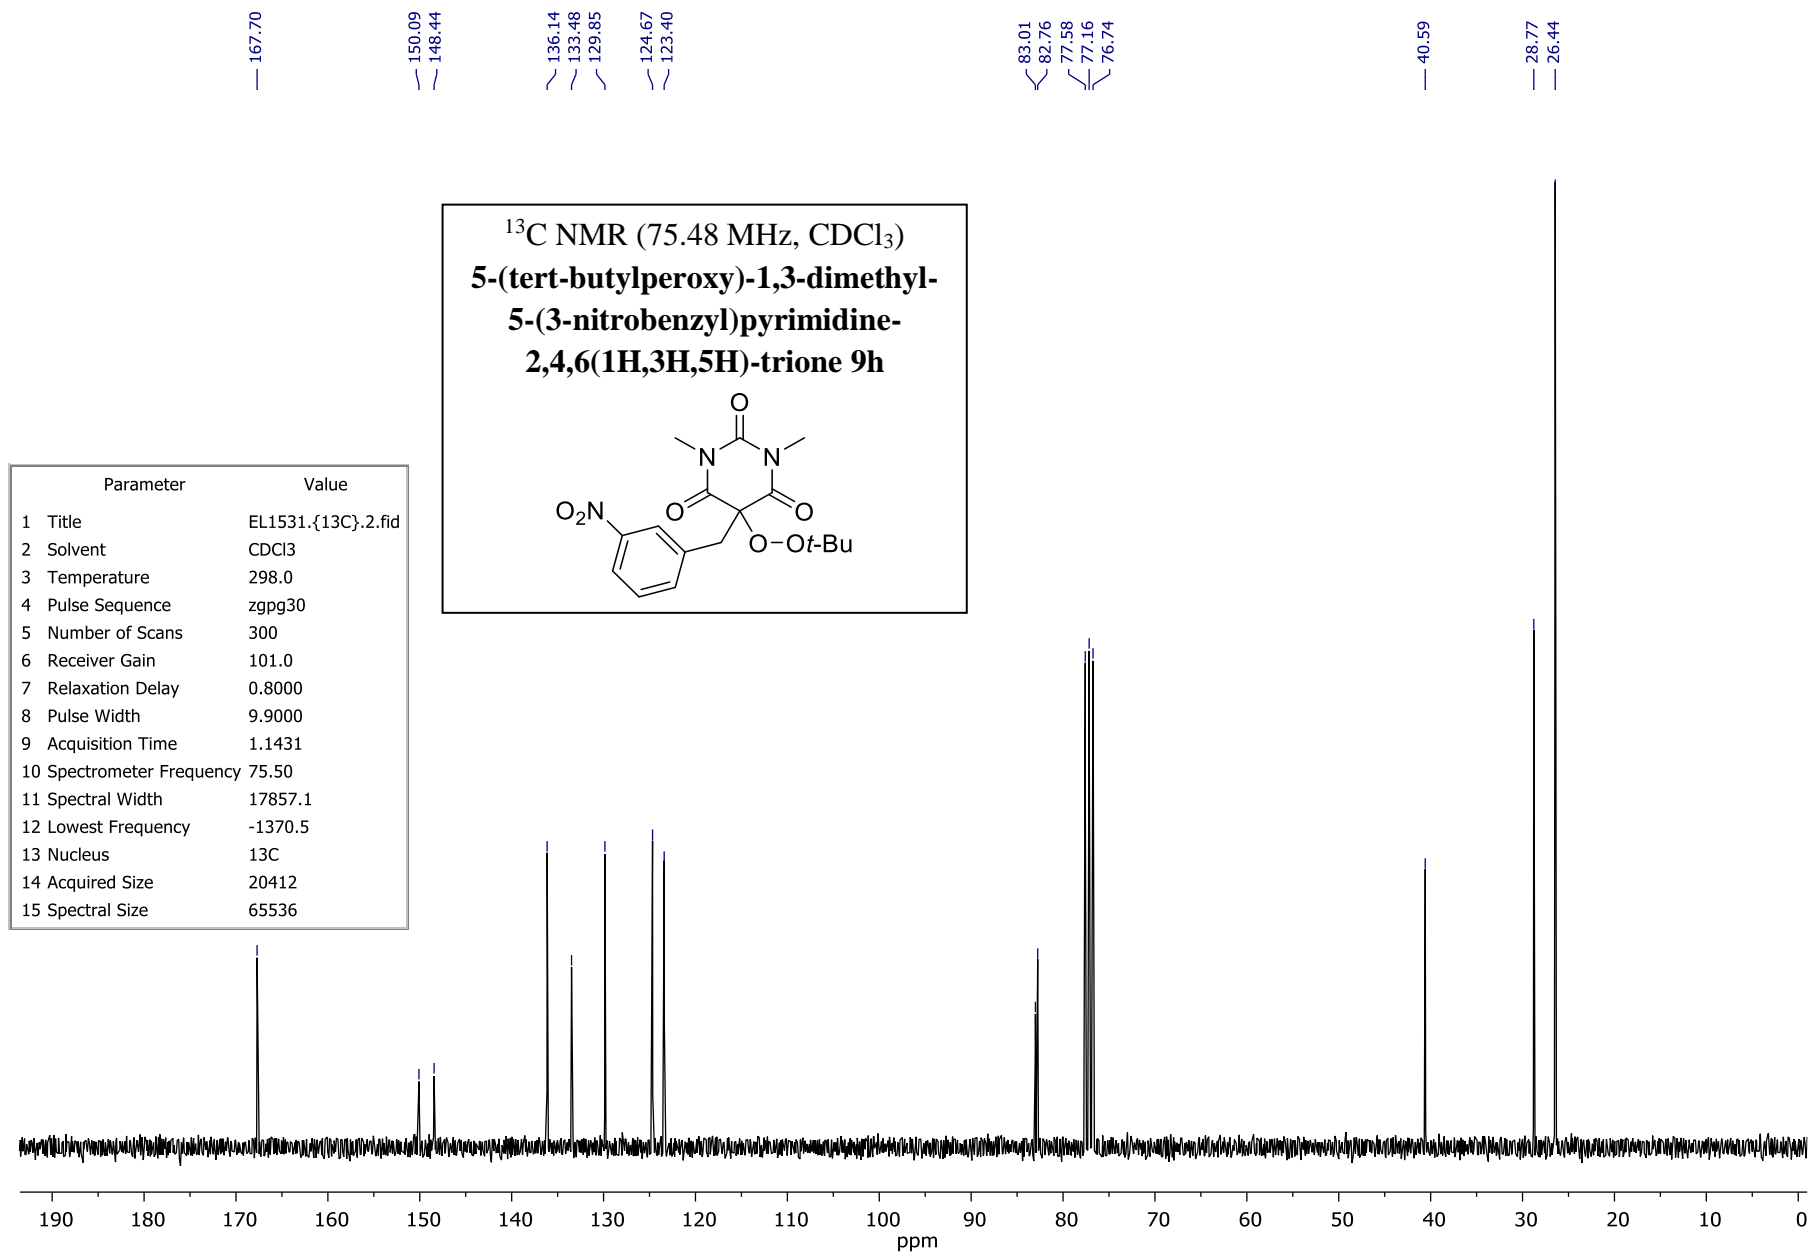

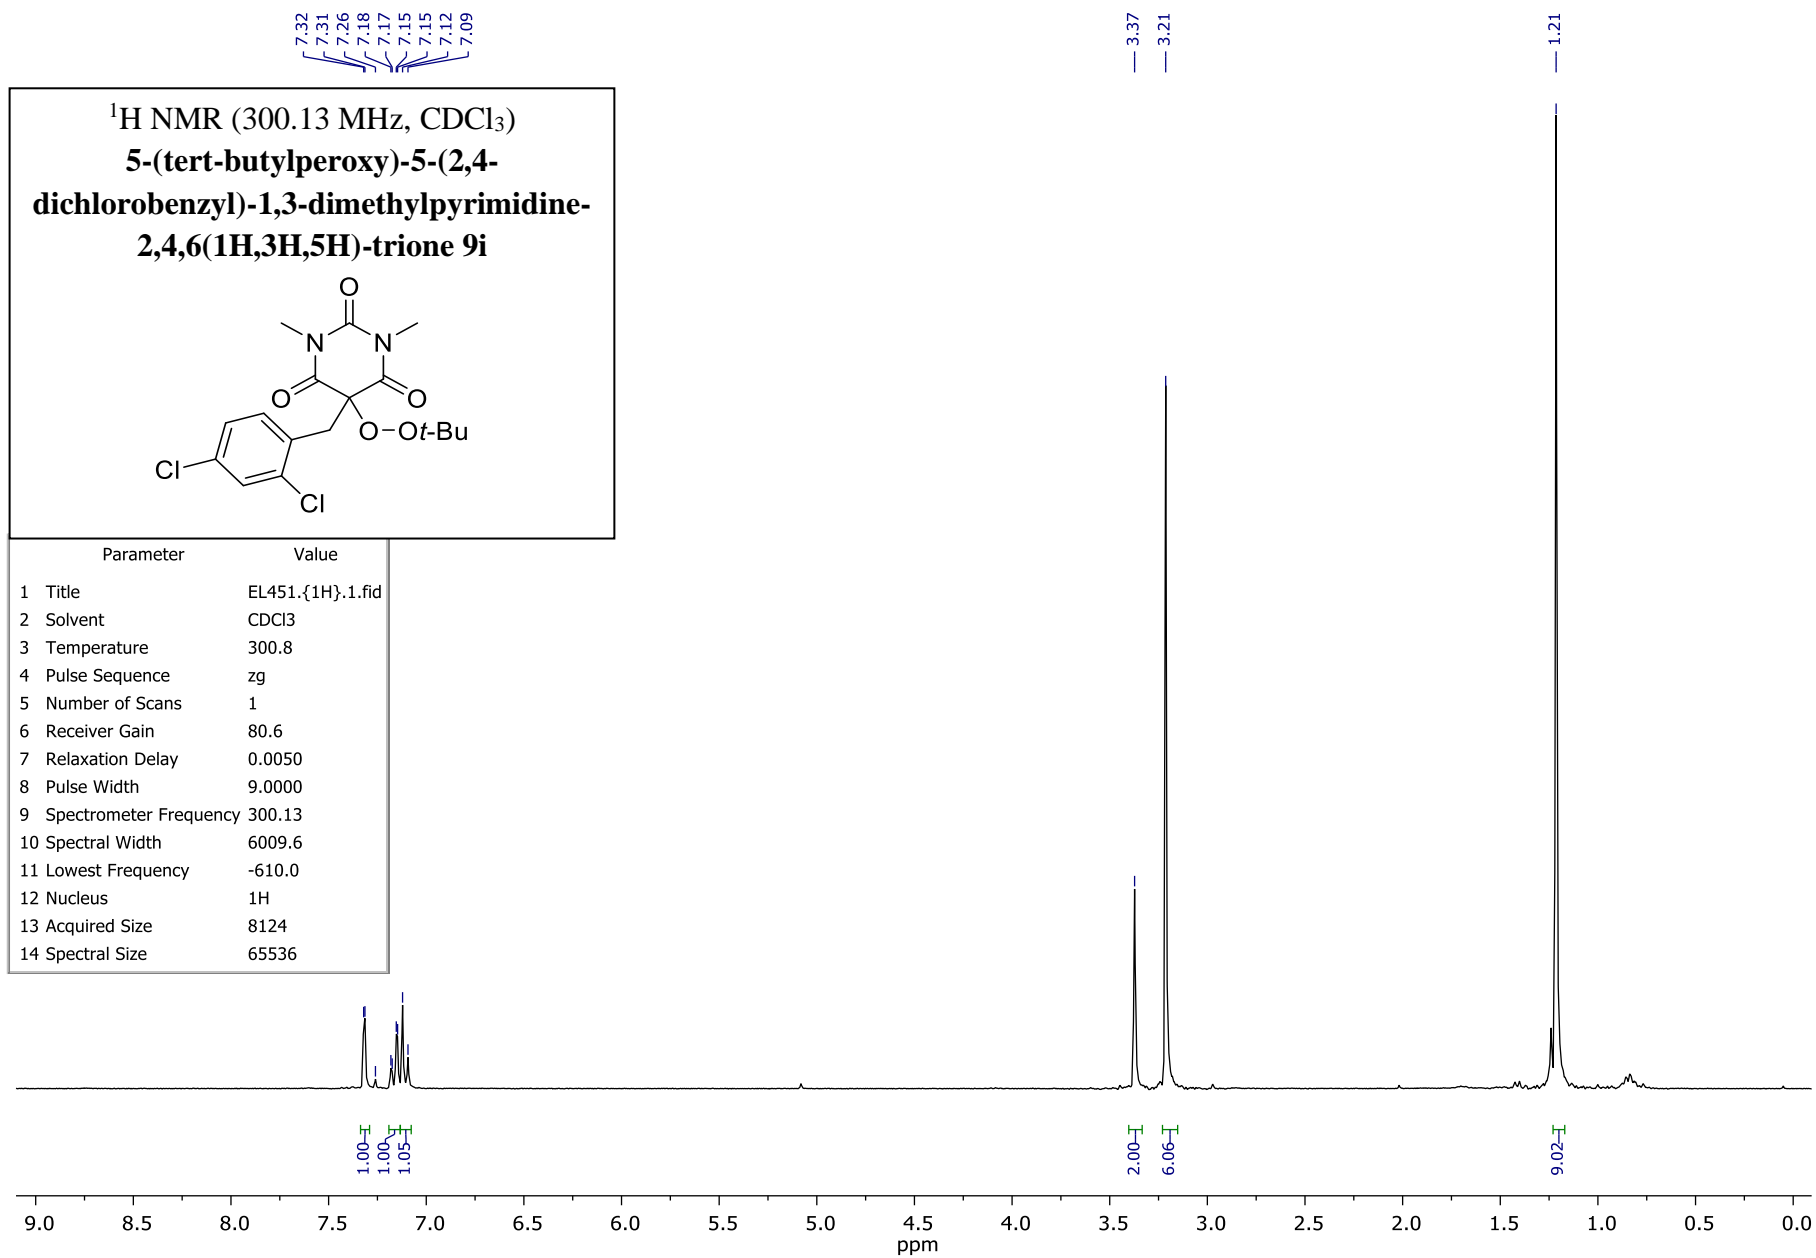



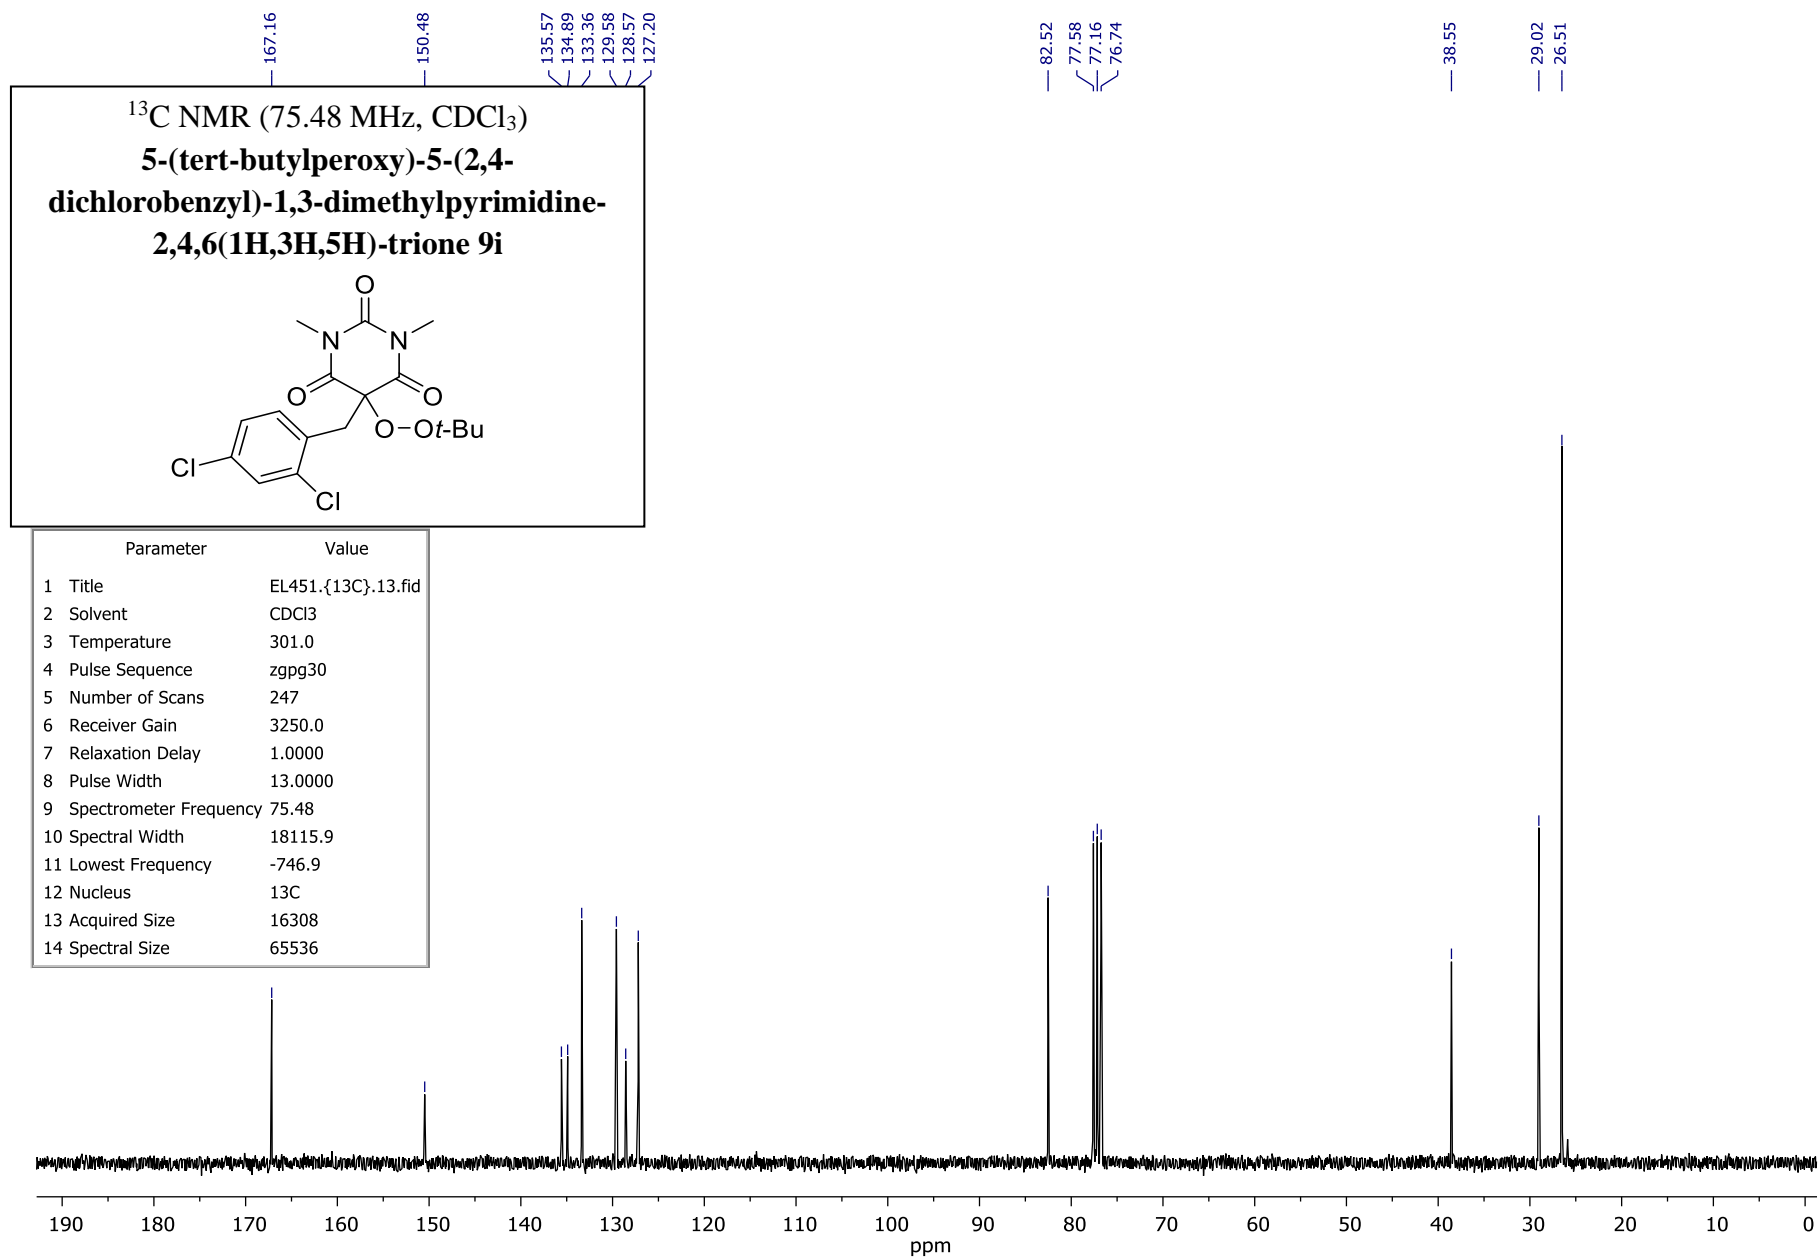

7.93  
7.91  
7.81  
7.79  
7.76  
7.73  
7.53  
7.51  
7.50  
7.48  
7.48  
7.47  
7.47  
7.45  
7.42  
7.35  
7.32  
7.30  
7.26  
7.21  
7.19

<sup>1</sup>H NMR (300.13 MHz, CDCl<sub>3</sub>)  
**5-(tert-butylperoxy)-1,3-dimethyl-5-(naphthalen-1-ylmethyl)pyrimidine-2,4,6(1H,3H,5H)-trione 9j**

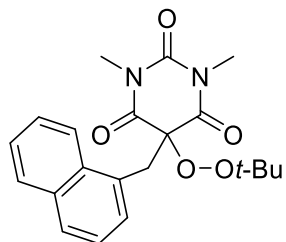

| Parameter                 | Value             |
|---------------------------|-------------------|
| 1 Title                   | EL1484.{1H}.1.fid |
| 2 Solvent                 | CDCl3             |
| 3 Temperature             | 301.3             |
| 4 Pulse Sequence          | zg                |
| 5 Number of Scans         | 1                 |
| 6 Receiver Gain           | 22.6              |
| 7 Relaxation Delay        | 0.0050            |
| 8 Pulse Width             | 9.0000            |
| 9 Acquisition Time        | 1.3518            |
| 10 Spectrometer Frequency | 300.13            |
| 11 Spectral Width         | 6009.6            |
| 12 Lowest Frequency       | -609.9            |
| 13 Nucleus                | 1H                |
| 14 Acquired Size          | 8124              |
| 15 Spectral Size          | 65536             |

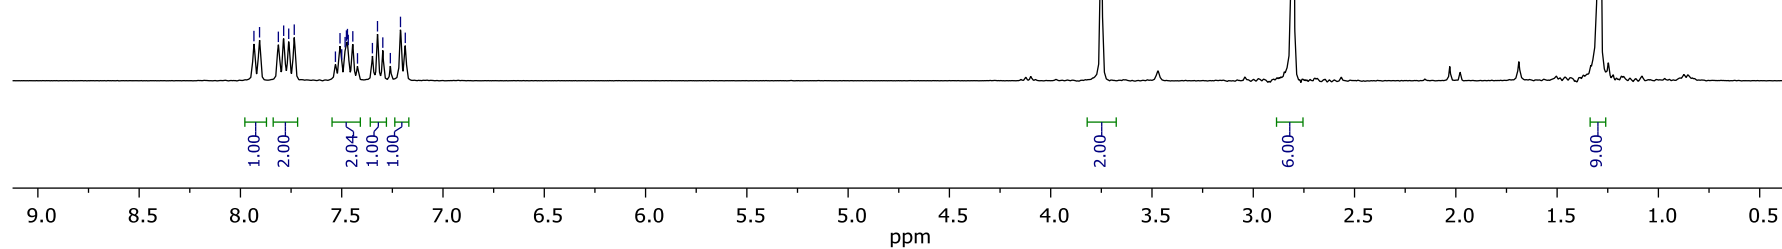

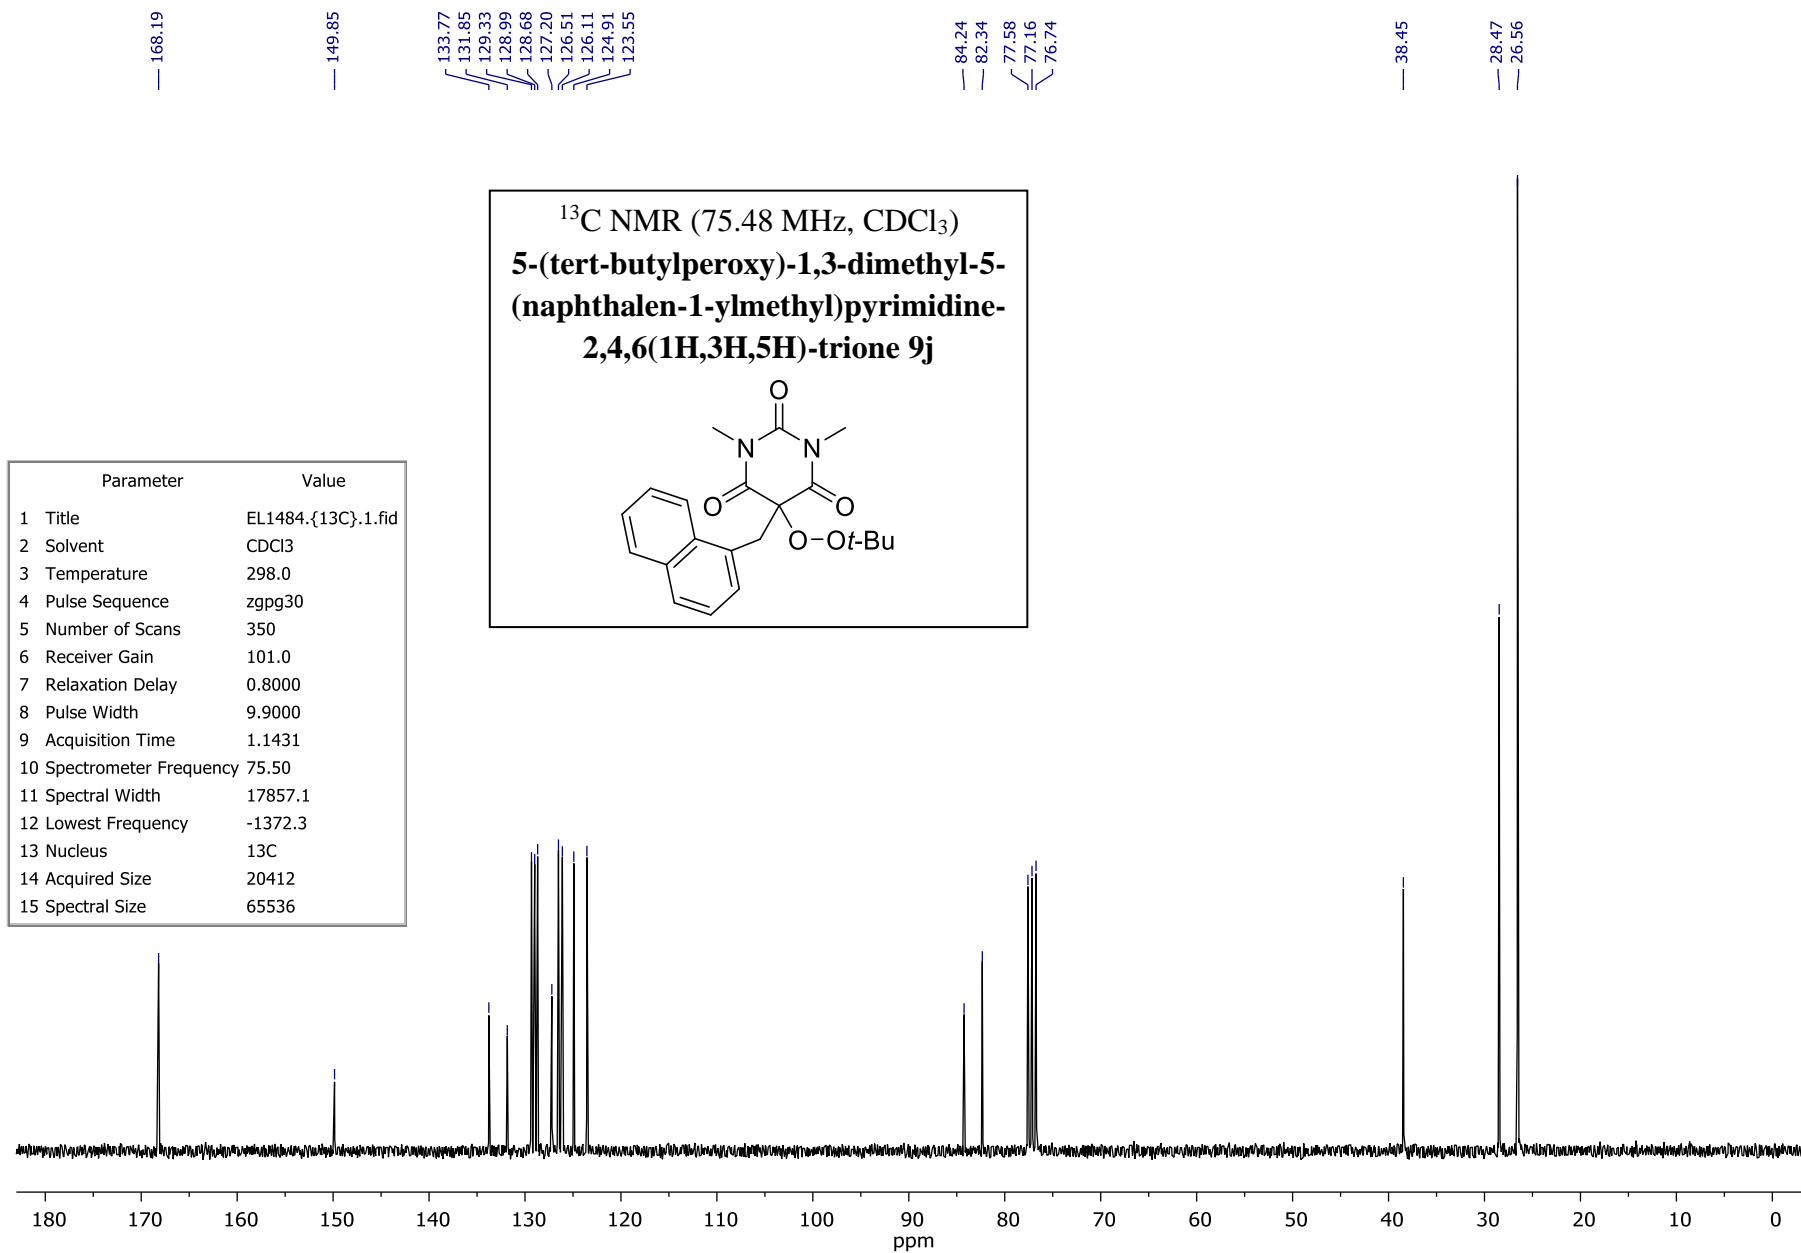

EL052.{1H}.1.fid  
Avance-300, CDCl<sub>3</sub>

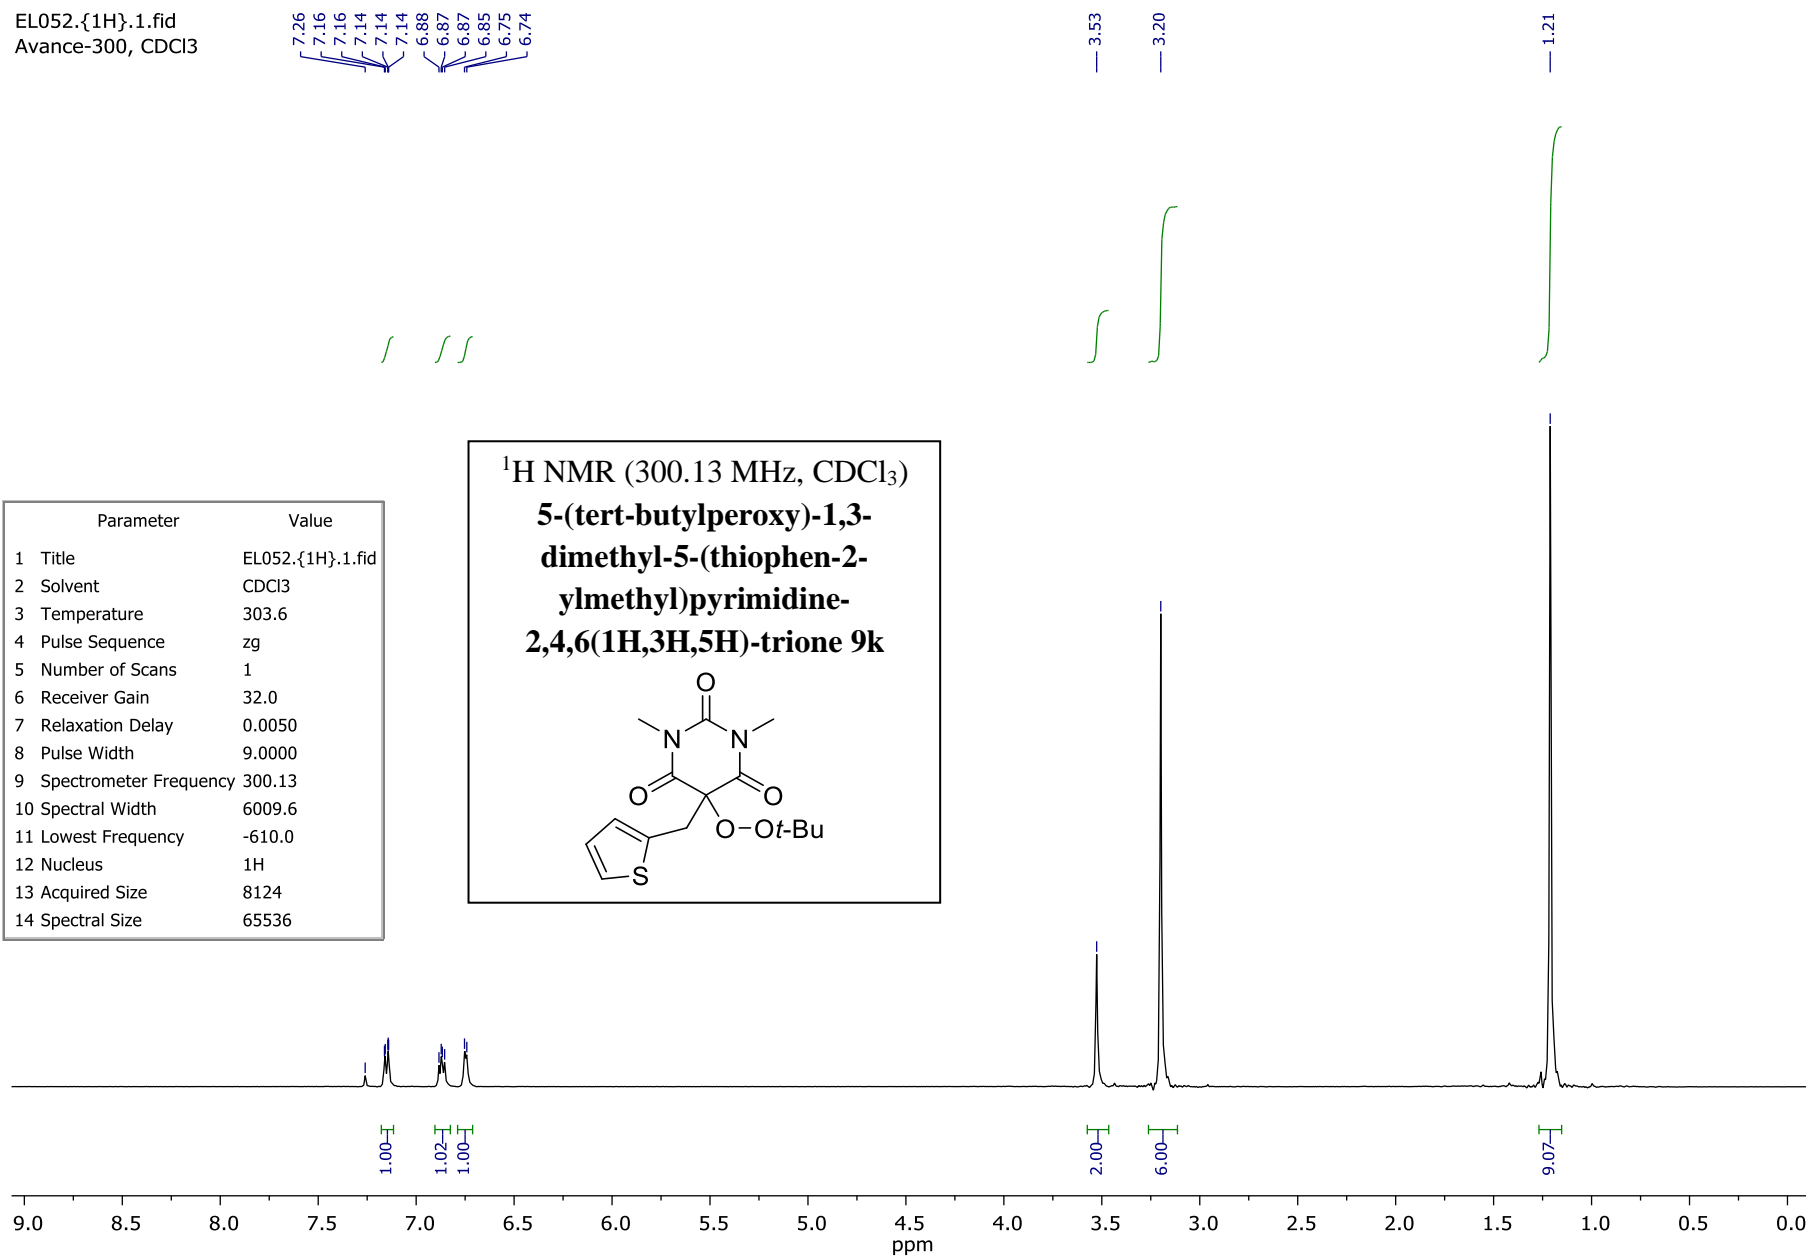

EL052.{13C}.13.fid  
/LB58 IYT1588

— 168.19

— 150.48

— 132.04  
— 128.57  
— 127.37  
— 126.40

— 83.27  
— 82.51  
— 77.58  
— 77.16  
— 76.74

— 35.50

— 28.75  
— 26.47

| Parameter                | Value              |
|--------------------------|--------------------|
| 1 Title                  | EL052.{13C}.13.fid |
| 2 Solvent                | CDCl <sub>3</sub>  |
| 3 Temperature            | 303.7              |
| 4 Pulse Sequence         | zgpg30             |
| 5 Number of Scans        | 210                |
| 6 Receiver Gain          | 3250.0             |
| 7 Relaxation Delay       | 1.0000             |
| 8 Pulse Width            | 13.0000            |
| 9 Spectrometer Frequency | 75.48              |
| 10 Spectral Width        | 18115.9            |
| 11 Lowest Frequency      | -744.6             |
| 12 Nucleus               | <sup>13</sup> C    |
| 13 Acquired Size         | 16308              |
| 14 Spectral Size         | 65536              |

<sup>13</sup>C NMR (75.48 MHz, CDCl<sub>3</sub>)

**5-(tert-butylperoxy)-1,3-dimethyl-5-(thiophen-2-ylmethyl)pyrimidine-2,4,6(1H,3H,5H)-trione 9k**

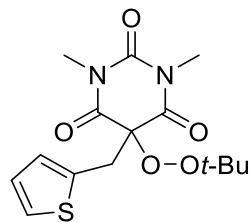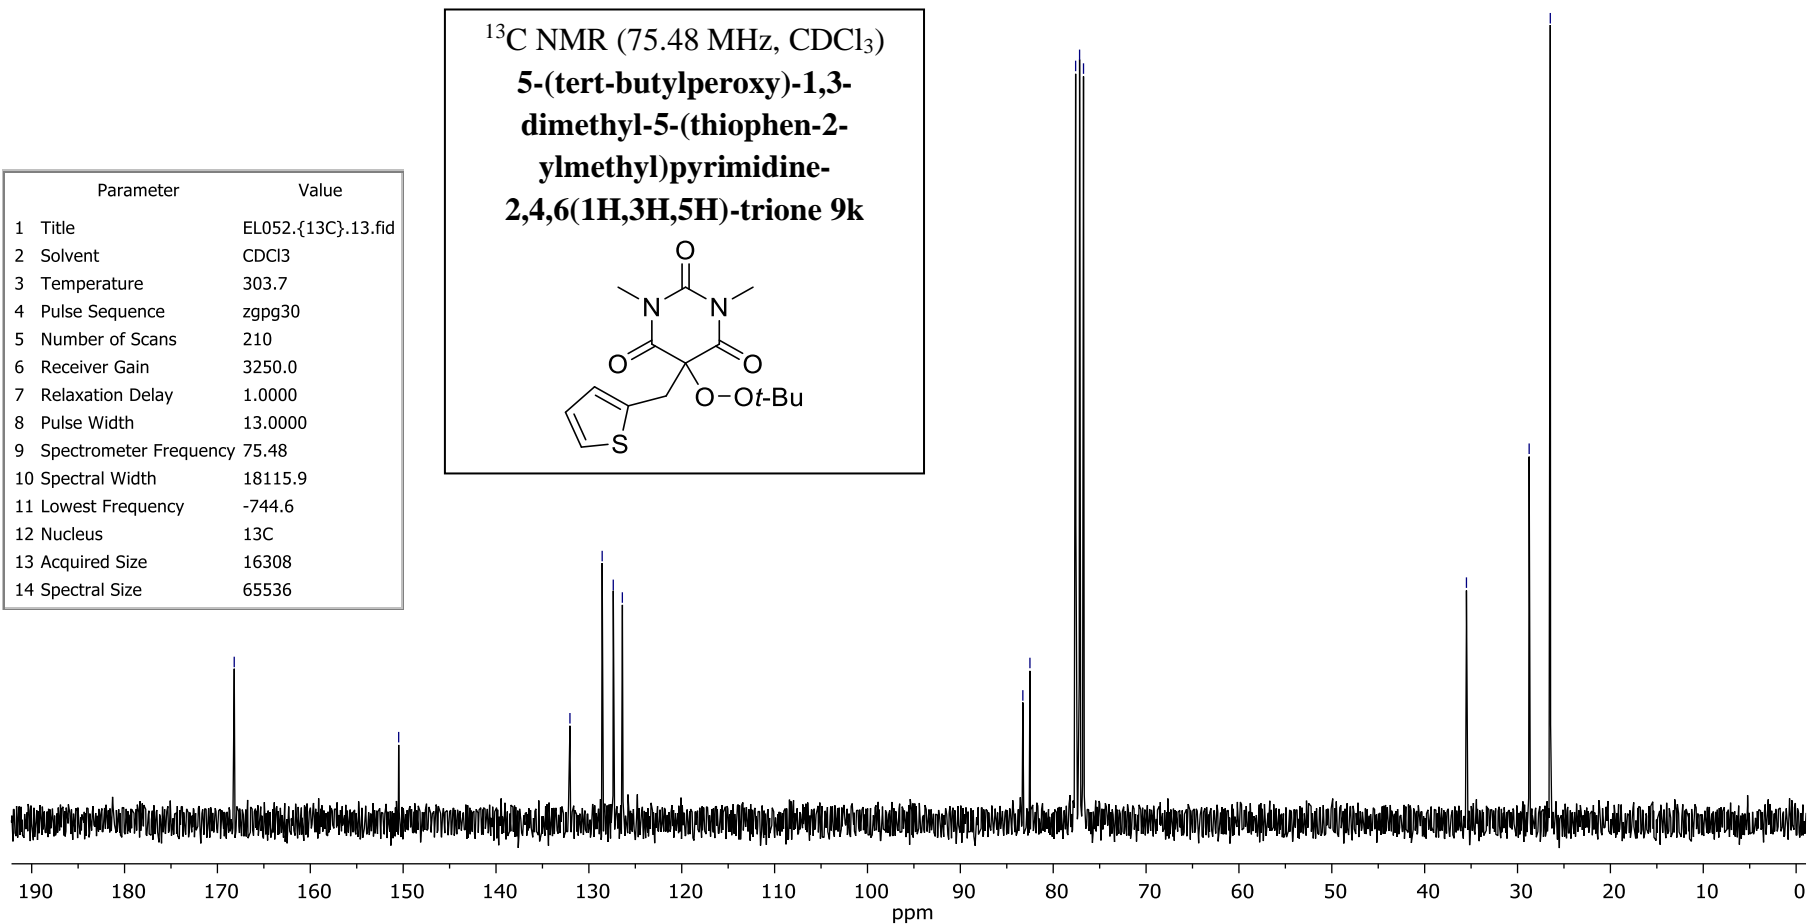

EL216.{1H}.1.fid  
Avance-300, CDCl<sub>3</sub>

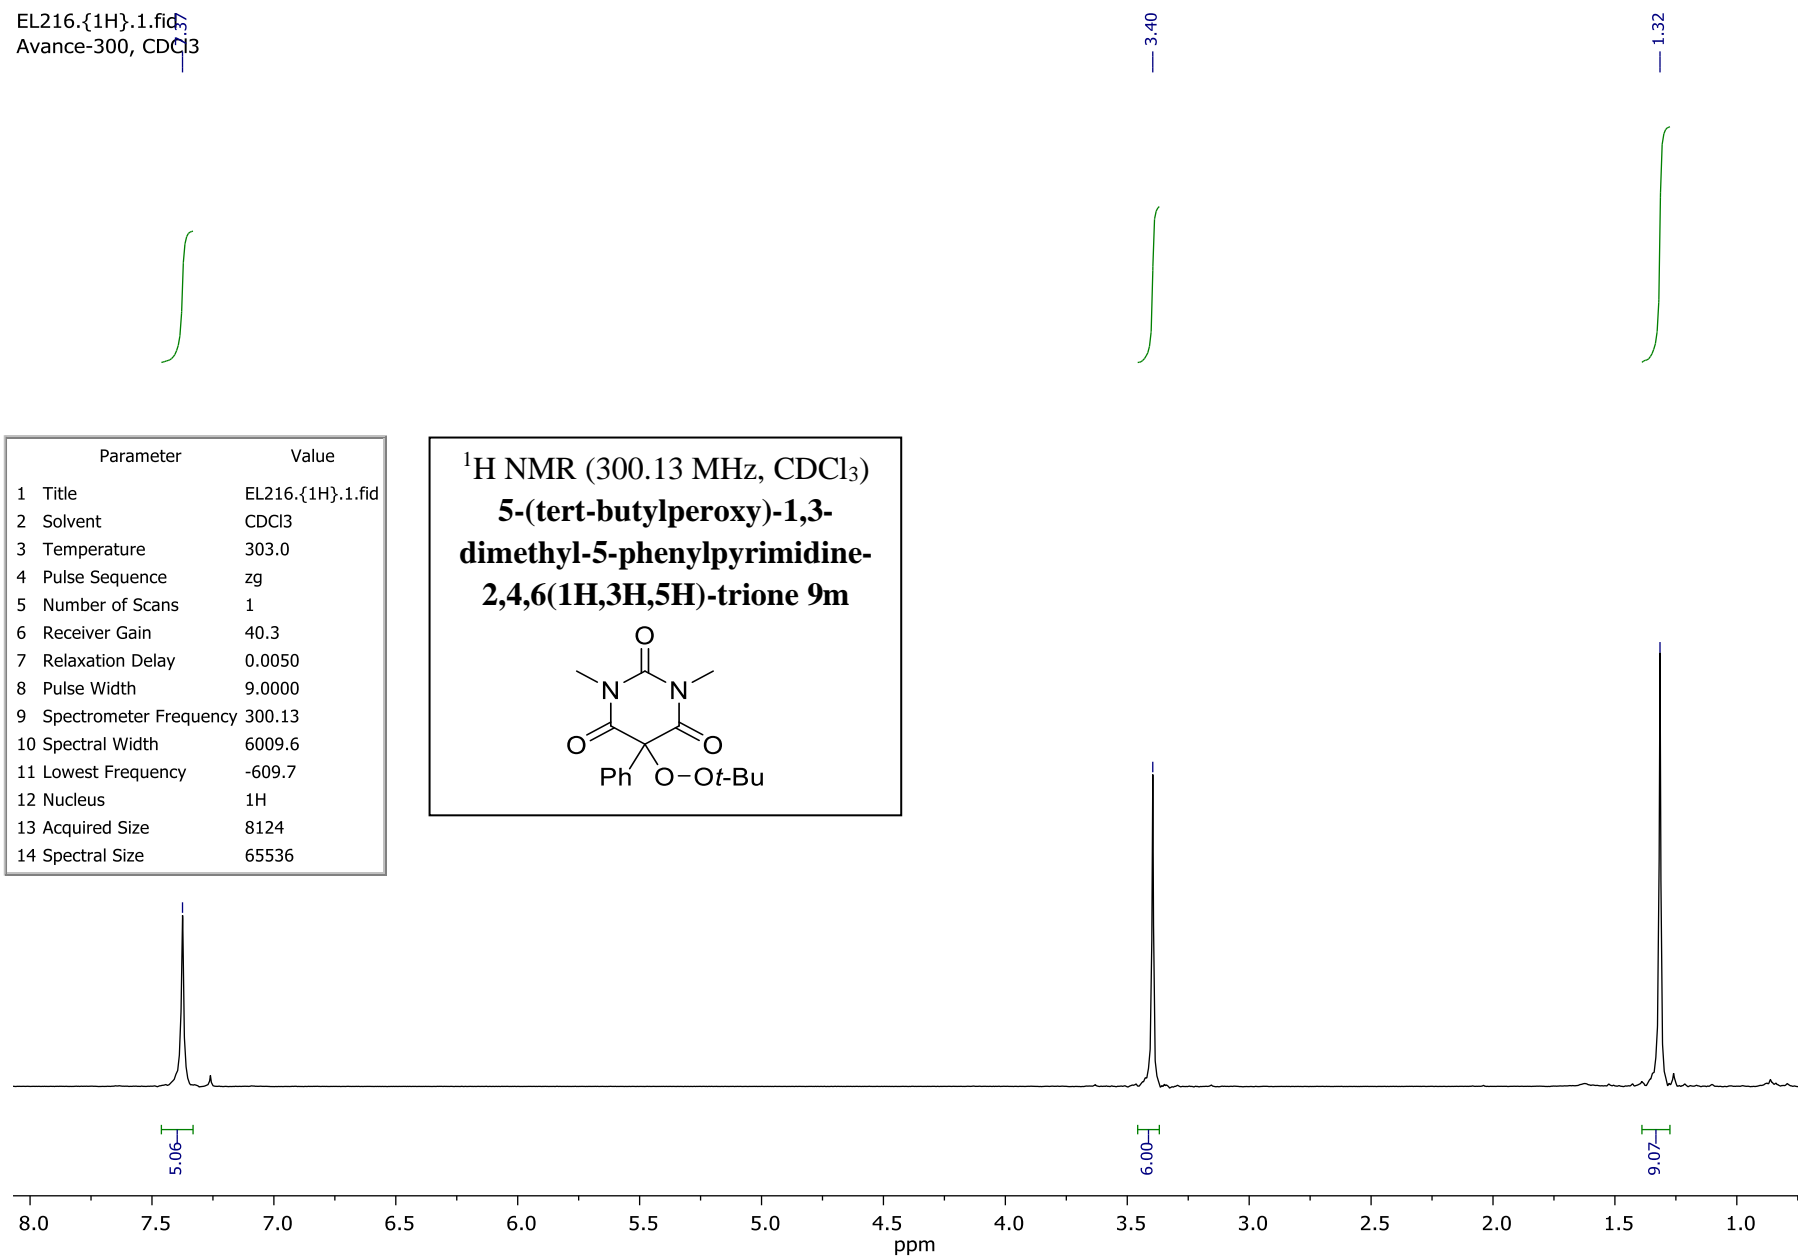

EL216.{13C}.13.fid  
/LB58 IYT1588

167.66

150.94

130.37  
129.14  
126.66

82.69  
77.58  
77.16  
76.74

29.29  
26.64

<sup>13</sup>C NMR (75.48 MHz, CDCl<sub>3</sub>)

**5-(tert-butylperoxy)-1,3-dimethyl-5-phenylpyrimidine-2,4,6(1H,3H,5H)-trione 9m**

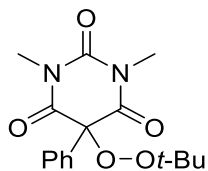

| Parameter                | Value              |
|--------------------------|--------------------|
| 1 Title                  | EL216.{13C}.13.fid |
| 2 Solvent                | CDCl <sub>3</sub>  |
| 3 Temperature            | 303.3              |
| 4 Pulse Sequence         | zgpg30             |
| 5 Number of Scans        | 157                |
| 6 Receiver Gain          | 3250.0             |
| 7 Relaxation Delay       | 1.0000             |
| 8 Pulse Width            | 13.0000            |
| 9 Spectrometer Frequency | 75.48              |
| 10 Spectral Width        | 18115.9            |
| 11 Lowest Frequency      | -744.7             |
| 12 Nucleus               | <sup>13</sup> C    |
| 13 Acquired Size         | 16308              |
| 14 Spectral Size         | 65536              |

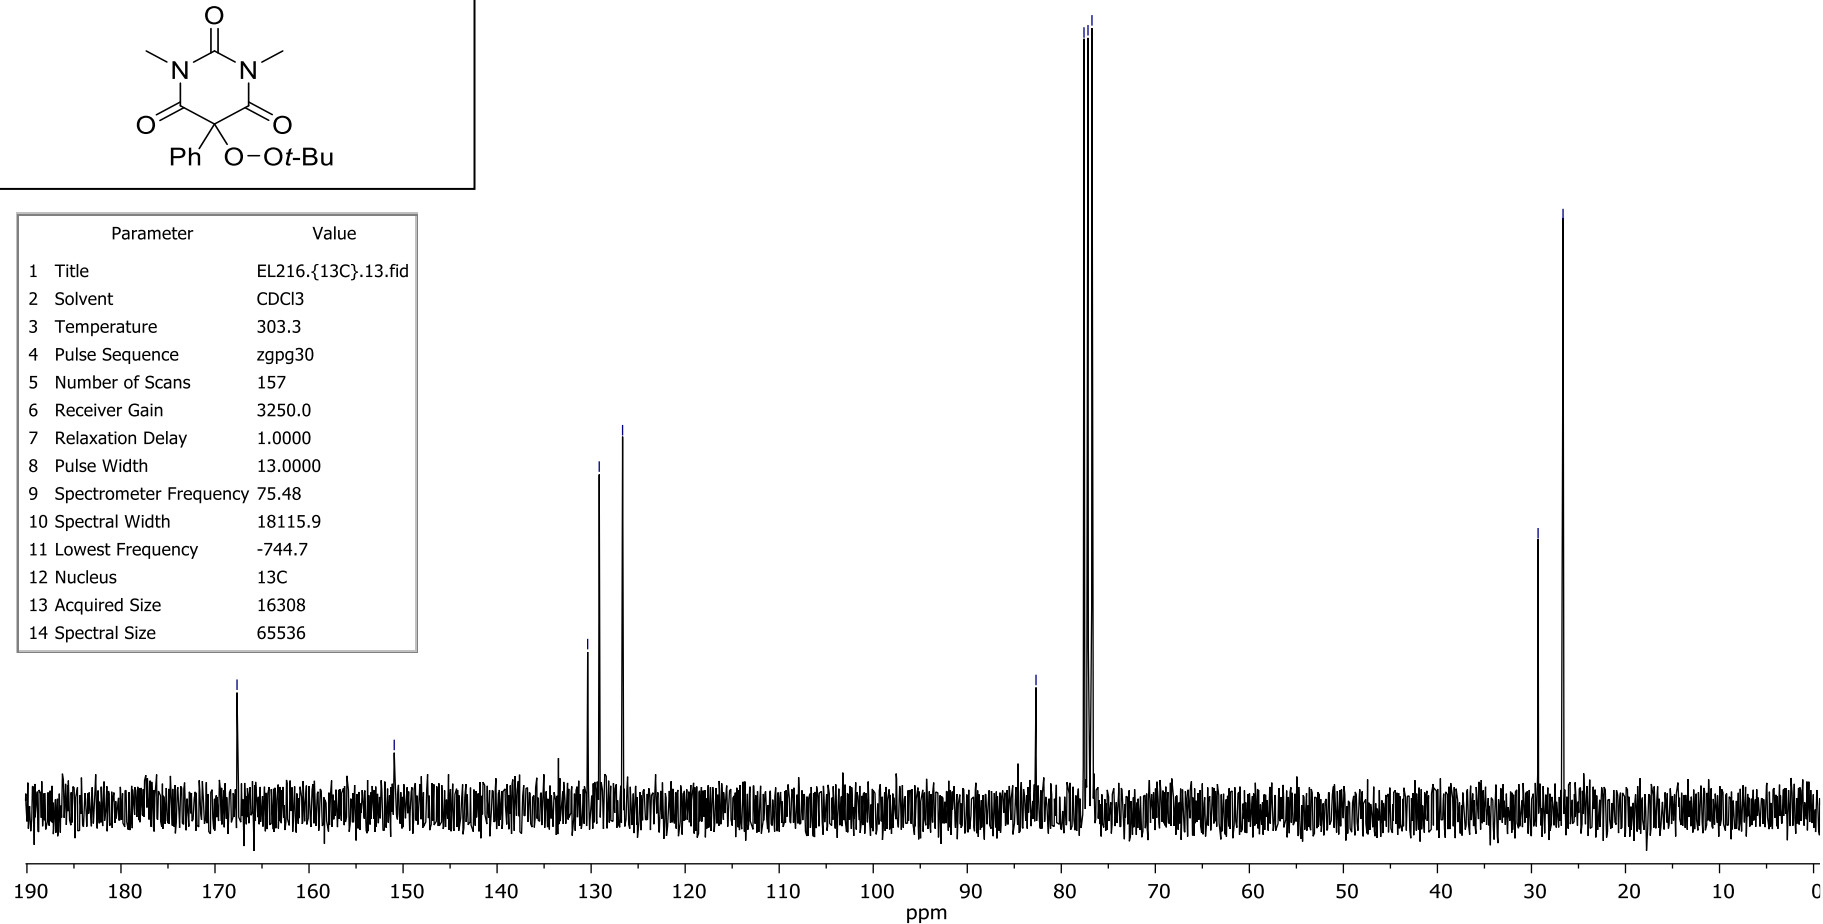

i8084.{1H}.1.fid  
/TERN i8199

— 7.26

— 3.34

— 1.60

— 1.18

| Parameter                | Value             |
|--------------------------|-------------------|
| 1 Title                  | i8084.{1H}.1.fid  |
| 2 Solvent                | CDCl <sub>3</sub> |
| 3 Temperature            | 297.1             |
| 4 Pulse Sequence         | zg                |
| 5 Number of Scans        | 1                 |
| 6 Receiver Gain          | 32.0              |
| 7 Relaxation Delay       | 0.0050            |
| 8 Pulse Width            | 9.0000            |
| 9 Spectrometer Frequency | 300.13            |
| 10 Spectral Width        | 6009.6            |
| 11 Lowest Frequency      | -602.4            |
| 12 Nucleus               | <sup>1</sup> H    |
| 13 Acquired Size         | 8124              |
| 14 Spectral Size         | 65536             |

<sup>1</sup>H NMR (300.13 MHz, CDCl<sub>3</sub>)  
**5-(tert-butylperoxy)-1,3,5-trimethylpyrimidine-2,4,6(1H,3H,5H)-trione 9n**

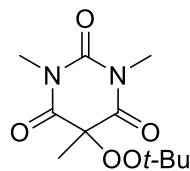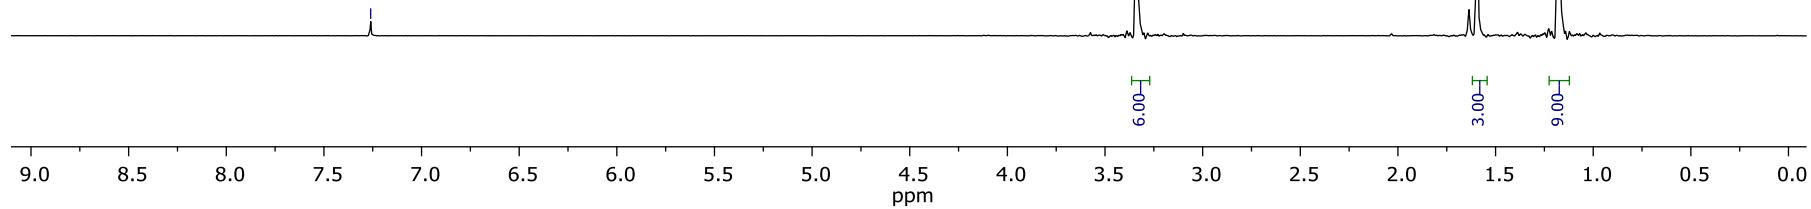



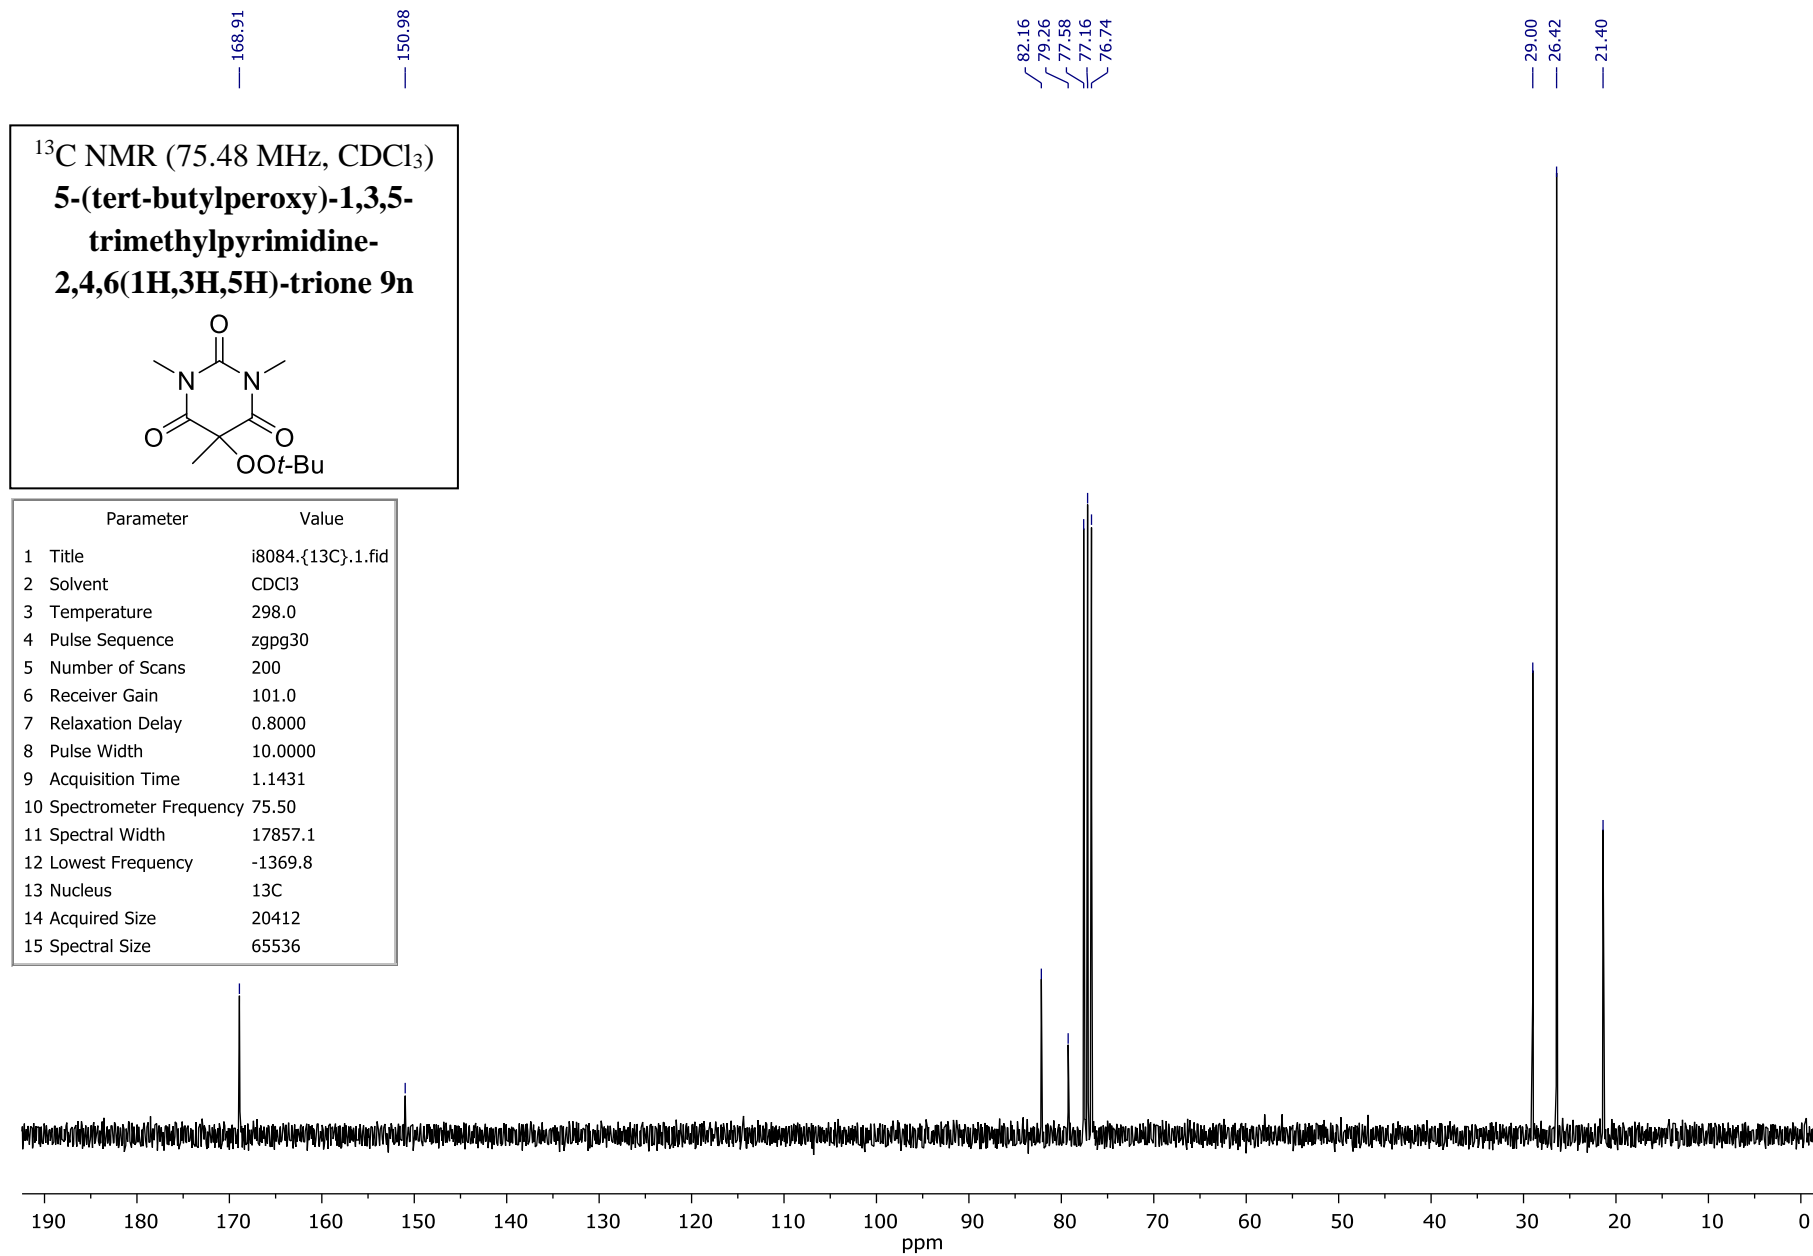

EL061.{1H}.1.fid  
/TERN EL061

| Parameter                | Value             |
|--------------------------|-------------------|
| 1 Title                  | EL061.{1H}.1.fid  |
| 2 Solvent                | CDCl <sub>3</sub> |
| 3 Temperature            | 298.0             |
| 4 Pulse Sequence         | zg                |
| 5 Number of Scans        | 1                 |
| 6 Receiver Gain          | 32.0              |
| 7 Relaxation Delay       | 0.1000            |
| 8 Pulse Width            | 14.7000           |
| 9 Spectrometer Frequency | 300.23            |
| 10 Spectral Width        | 5882.4            |
| 11 Lowest Frequency      | -1094.2           |
| 12 Nucleus               | <sup>1</sup> H    |
| 13 Acquired Size         | 16308             |
| 14 Spectral Size         | 65536             |

<sup>1</sup>H NMR (300.13 MHz, CDCl<sub>3</sub>)  
**5-butyl-5-(tert-butylperoxy)-  
1,3-dimethylpyrimidine-  
2,4,6(1H,3H,5H)-trione 9o**

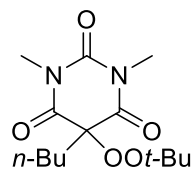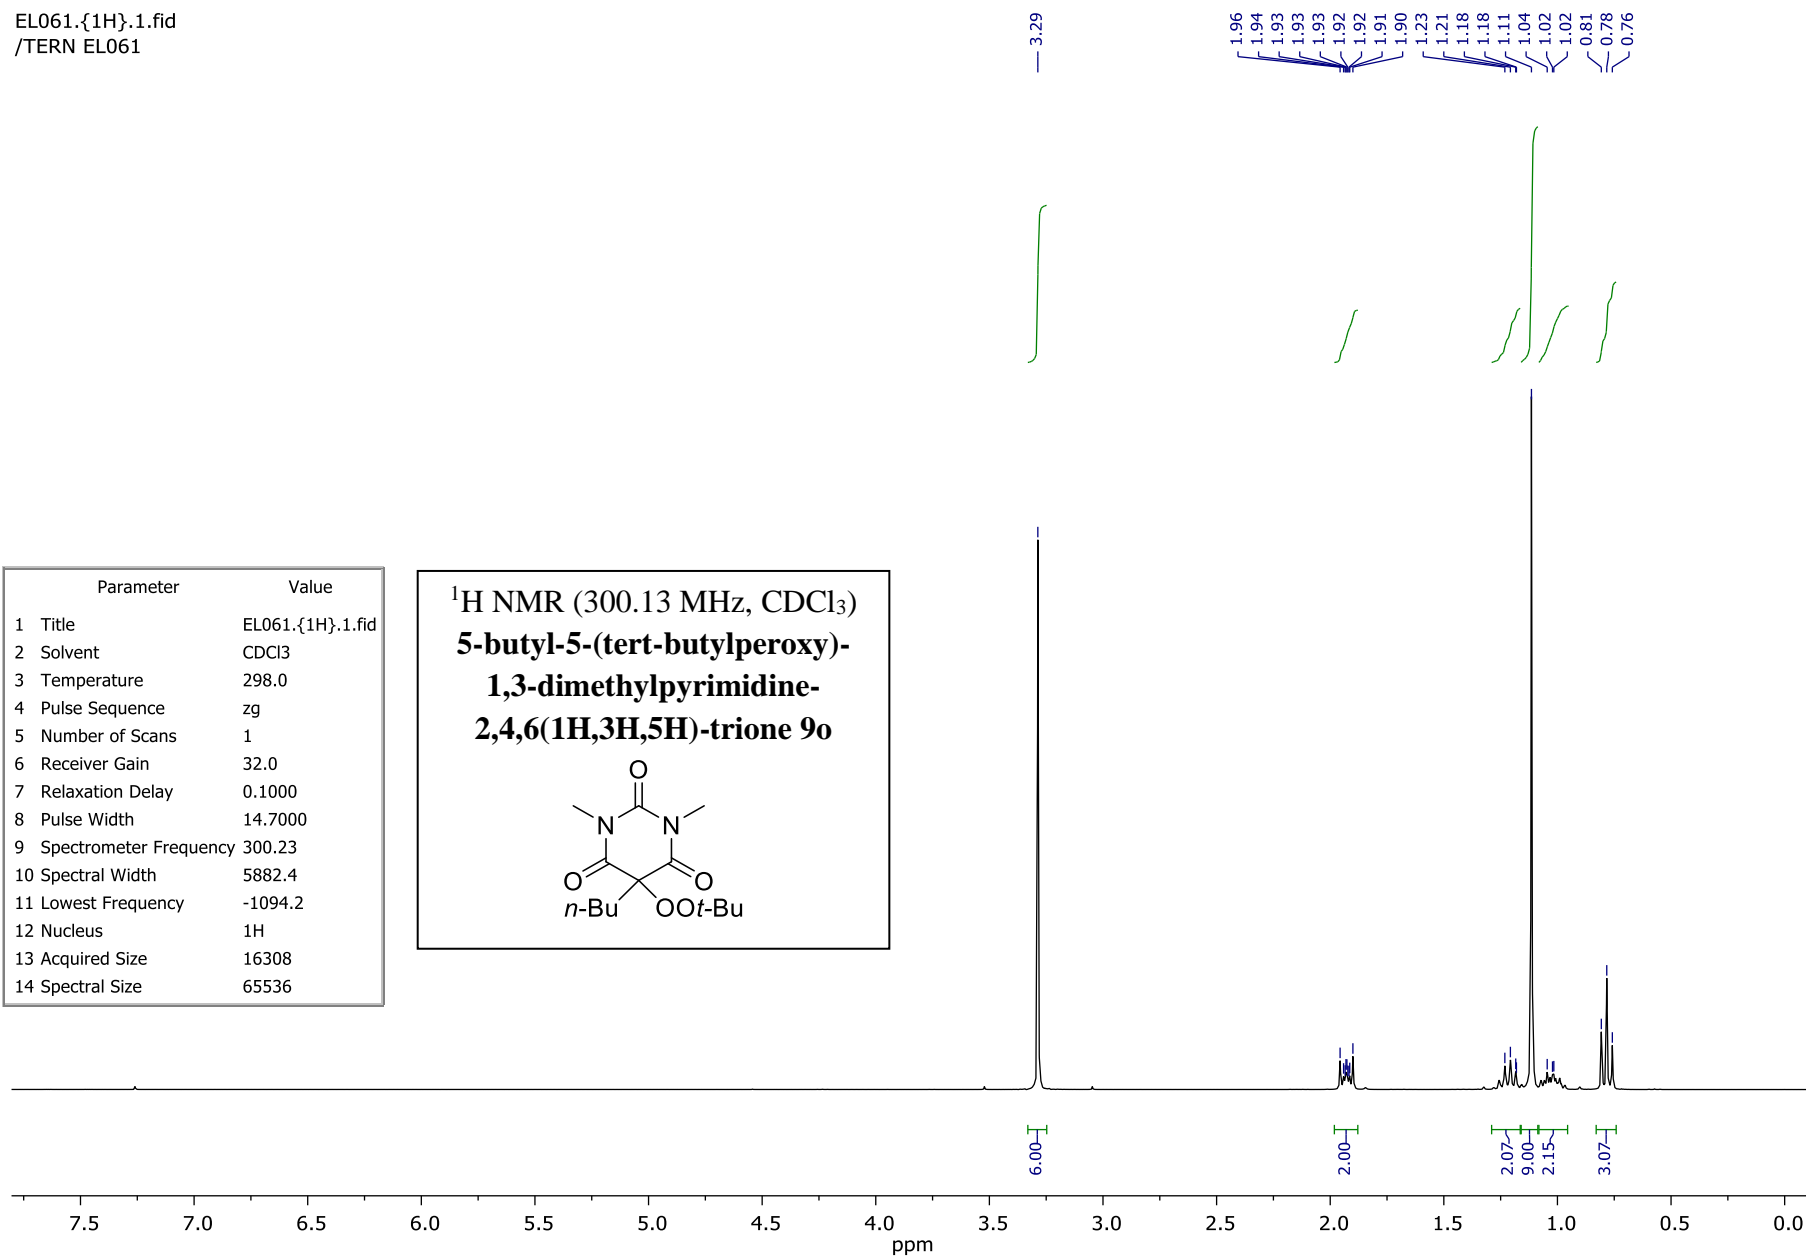

EL061.{13C}.2.fid  
/TERN EL061

— 168.60

— 150.89

82.82  
81.89  
77.59  
77.16  
76.74

— 35.13

28.73  
26.32  
24.91  
22.51

— 13.60

| Parameter                | Value             |
|--------------------------|-------------------|
| 1 Title                  | EL061.{13C}.2.fid |
| 2 Solvent                | CDCl <sub>3</sub> |
| 3 Temperature            | 298.0             |
| 4 Pulse Sequence         | zgpg30            |
| 5 Number of Scans        | 256               |
| 6 Receiver Gain          | 101.0             |
| 7 Relaxation Delay       | 0.8000            |
| 8 Pulse Width            | 9.9000            |
| 9 Spectrometer Frequency | 75.50             |
| 10 Spectral Width        | 17857.1           |
| 11 Lowest Frequency      | -1374.6           |
| 12 Nucleus               | 13C               |
| 13 Acquired Size         | 20412             |
| 14 Spectral Size         | 65536             |

<sup>13</sup>C NMR (75.48 MHz, CDCl<sub>3</sub>)  
**5-butyl-5-(tert-butylperoxy)-  
1,3-dimethylpyrimidine-  
2,4,6(1H,3H,5H)-trione 9o**

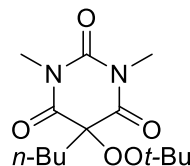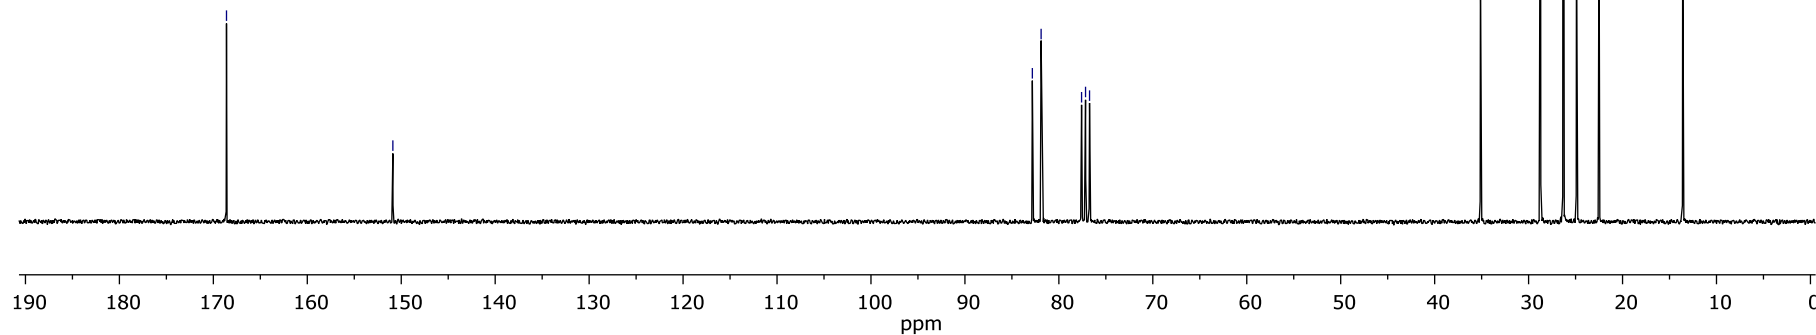

EL069.{1H}.1.fid  
Avance-300, CDCl<sub>3</sub>

7.26

3.31

1.98  
1.96  
1.95  
1.93  
1.92

1.21  
1.19  
1.18  
1.17  
1.16  
1.14  
1.12  
1.11  
1.10  
1.07  
1.06  
0.82  
0.81  
0.80  
0.78

| Parameter                | Value             |
|--------------------------|-------------------|
| 1 Title                  | EL069.{1H}.1.fid  |
| 2 Solvent                | CDCl <sub>3</sub> |
| 3 Temperature            | 303.6             |
| 4 Pulse Sequence         | zg                |
| 5 Number of Scans        | 1                 |
| 6 Receiver Gain          | 6.3               |
| 7 Relaxation Delay       | 0.0050            |
| 8 Pulse Width            | 9.0000            |
| 9 Spectrometer Frequency | 300.13            |
| 10 Spectral Width        | 6009.6            |
| 11 Lowest Frequency      | -610.3            |
| 12 Nucleus               | <sup>1</sup> H    |
| 13 Acquired Size         | 8124              |
| 14 Spectral Size         | 65536             |

<sup>1</sup>H NMR (300.13 MHz, CDCl<sub>3</sub>)  
**5-(tert-butylperoxy)-5-hexyl-1,3-dimethylpyrimidine-2,4,6(1H,3H,5H)-trione 9p**

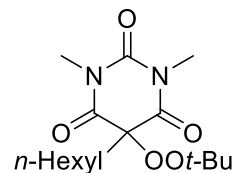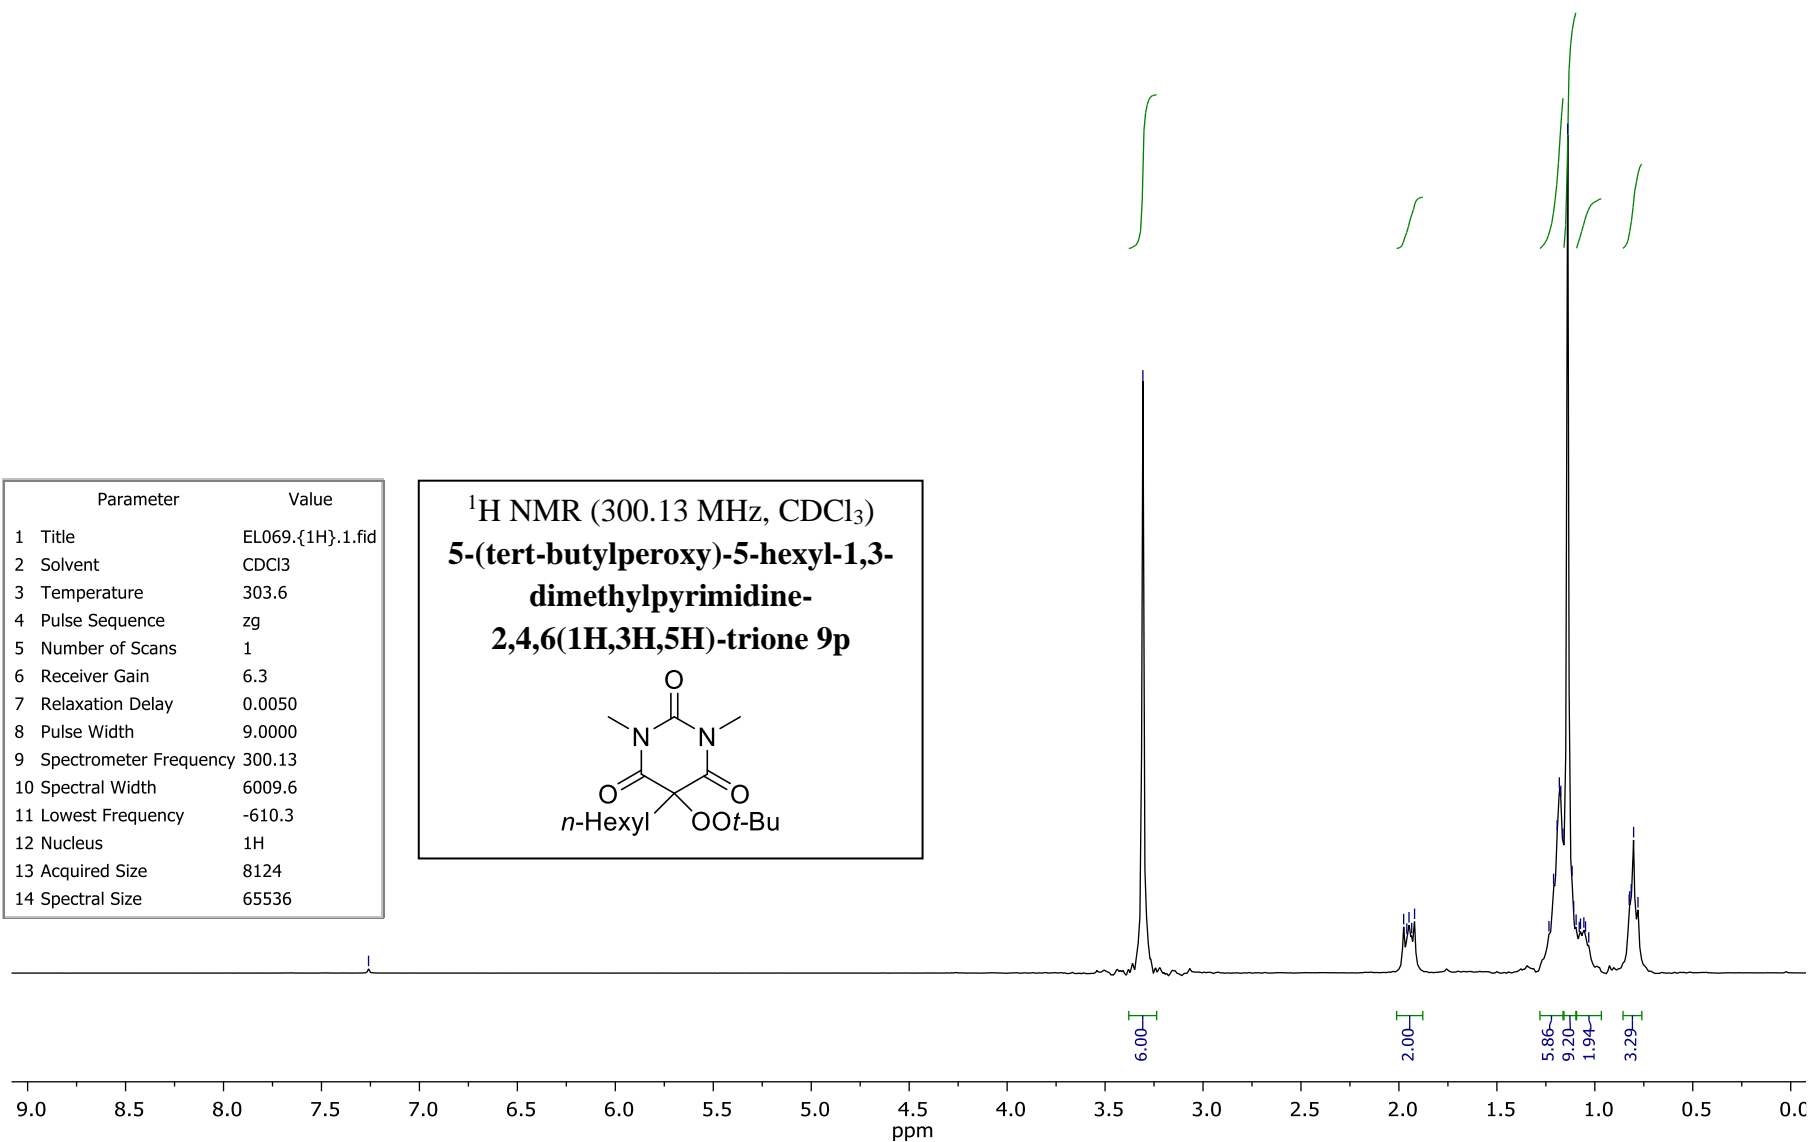

EL069.{13C}.13.fid  
/LB58 IYT1588

— 168.66

— 150.99

82.94  
81.95  
77.58  
77.16  
76.74

35.37  
31.27  
29.03  
28.77  
26.40  
22.87  
22.45

— 13.96

| Parameter                | Value              |
|--------------------------|--------------------|
| 1 Title                  | EL069.{13C}.13.fid |
| 2 Solvent                | CDCl <sub>3</sub>  |
| 3 Temperature            | 303.6              |
| 4 Pulse Sequence         | zgpg30             |
| 5 Number of Scans        | 187                |
| 6 Receiver Gain          | 3250.0             |
| 7 Relaxation Delay       | 1.0000             |
| 8 Pulse Width            | 13.0000            |
| 9 Spectrometer Frequency | 75.48              |
| 10 Spectral Width        | 18115.9            |
| 11 Lowest Frequency      | -746.5             |
| 12 Nucleus               | <sup>13</sup> C    |
| 13 Acquired Size         | 16308              |
| 14 Spectral Size         | 65536              |

<sup>13</sup>C NMR (75.48 MHz, CDCl<sub>3</sub>)  
**5-(tert-butylperoxy)-5-hexyl-1,3-dimethylpyrimidine-2,4,6(1H,3H,5H)-trione 9p**

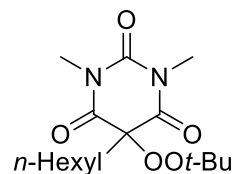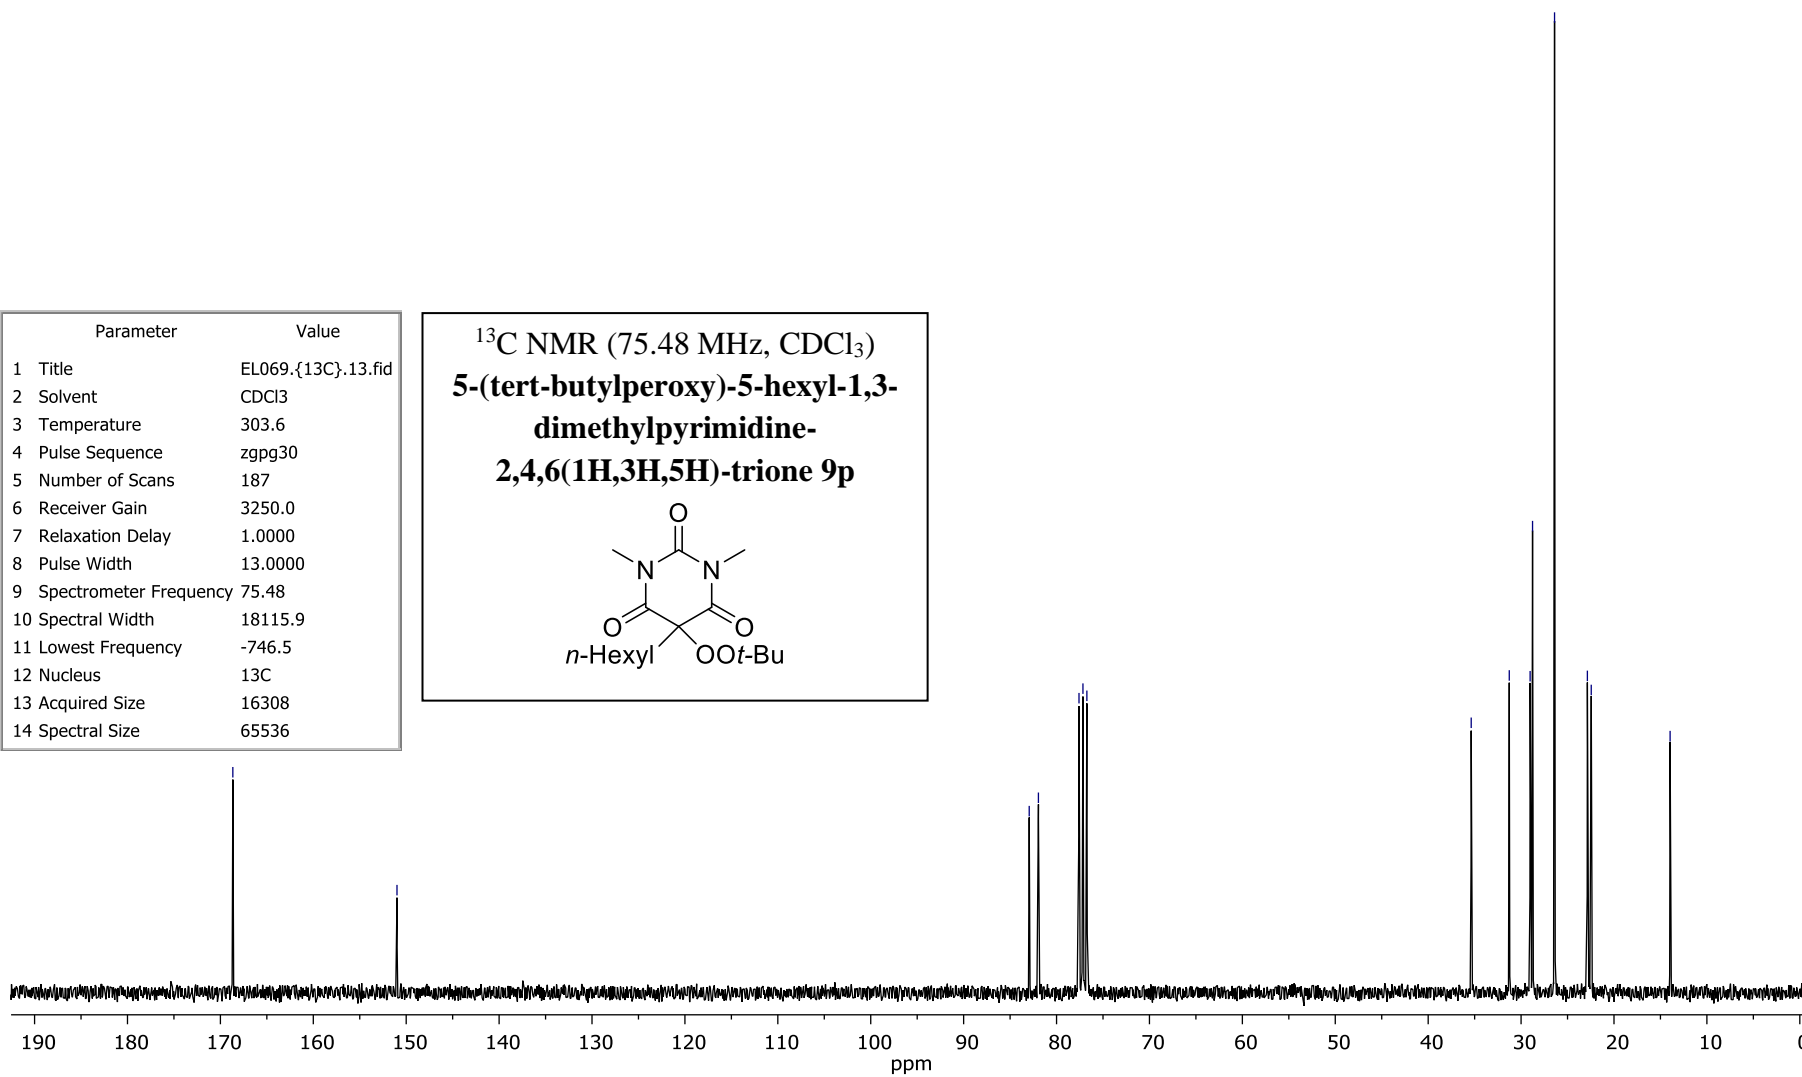

EL196.{1H}.1.fid  
Avance-300, CDCl<sub>3</sub>

7.24  
7.23  
7.22  
7.21  
7.20  
7.05  
7.04  
7.03  
7.02

3.28  
3.07

1.21

| Parameter                | Value             |
|--------------------------|-------------------|
| 1 Title                  | EL196.{1H}.1.fid  |
| 2 Solvent                | CDCl <sub>3</sub> |
| 3 Temperature            | 302.3             |
| 4 Pulse Sequence         | zg                |
| 5 Number of Scans        | 1                 |
| 6 Receiver Gain          | 25.4              |
| 7 Relaxation Delay       | 0.0050            |
| 8 Pulse Width            | 9.0000            |
| 9 Spectrometer Frequency | 300.13            |
| 10 Spectral Width        | 6009.6            |
| 11 Lowest Frequency      | -619.0            |
| 12 Nucleus               | <sup>1</sup> H    |
| 13 Acquired Size         | 8124              |
| 14 Spectral Size         | 65536             |

<sup>1</sup>H NMR (300.13 MHz, CDCl<sub>3</sub>)  
**5-benzyl-5-(tert-butylperoxy)-  
1-methylpyrimidine-  
2,4,6(1H,3H,5H)-trione 9r**

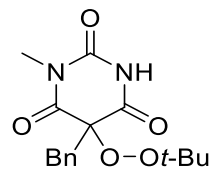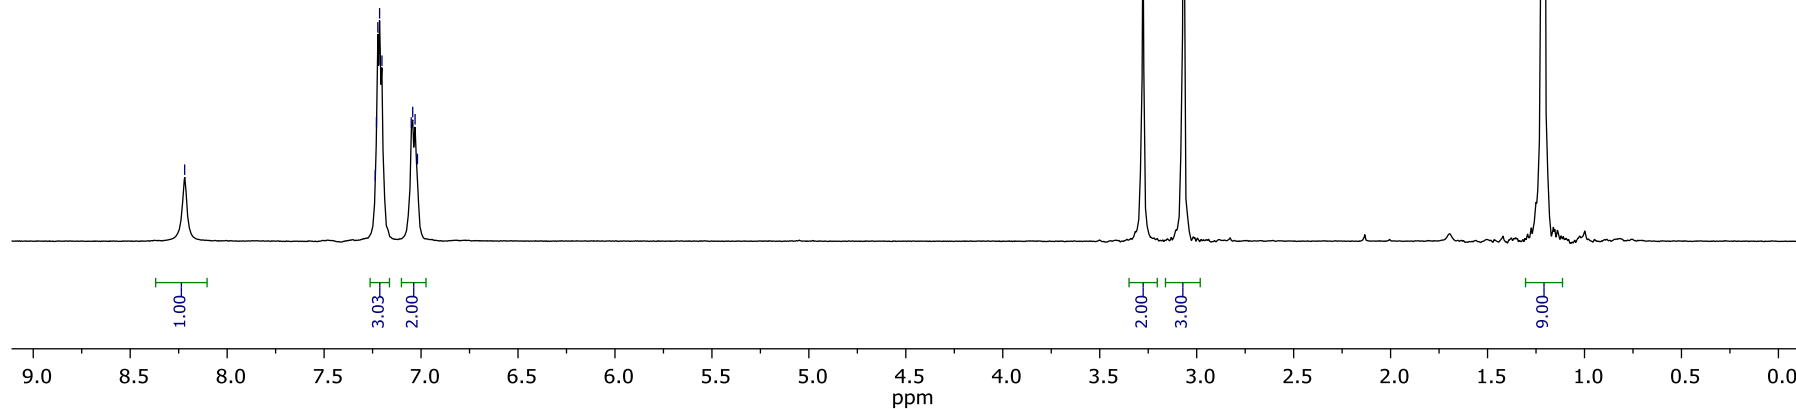

EL196.{13C}.13.fid  
/LB58 IYT1588

168.97  
167.60

148.99

130.60  
129.95  
129.01  
128.45

84.07  
82.60  
77.58  
77.16  
76.74

41.11

27.99  
26.48

<sup>13</sup>C NMR (75.48 MHz, CDCl<sub>3</sub>)  
**5-benzyl-5-(tert-butylperoxy)-1-methylpyrimidine-2,4,6(1H,3H,5H)-trione 9r**

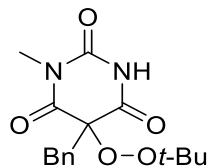

| Parameter                | Value              |
|--------------------------|--------------------|
| 1 Title                  | EL196.{13C}.13.fid |
| 2 Solvent                | CDCl <sub>3</sub>  |
| 3 Temperature            | 302.4              |
| 4 Pulse Sequence         | zgpg30             |
| 5 Number of Scans        | 249                |
| 6 Receiver Gain          | 3250.0             |
| 7 Relaxation Delay       | 1.0000             |
| 8 Pulse Width            | 13.0000            |
| 9 Spectrometer Frequency | 75.48              |
| 10 Spectral Width        | 18115.9            |
| 11 Lowest Frequency      | -749.7             |
| 12 Nucleus               | <sup>13</sup> C    |
| 13 Acquired Size         | 16308              |
| 14 Spectral Size         | 65536              |

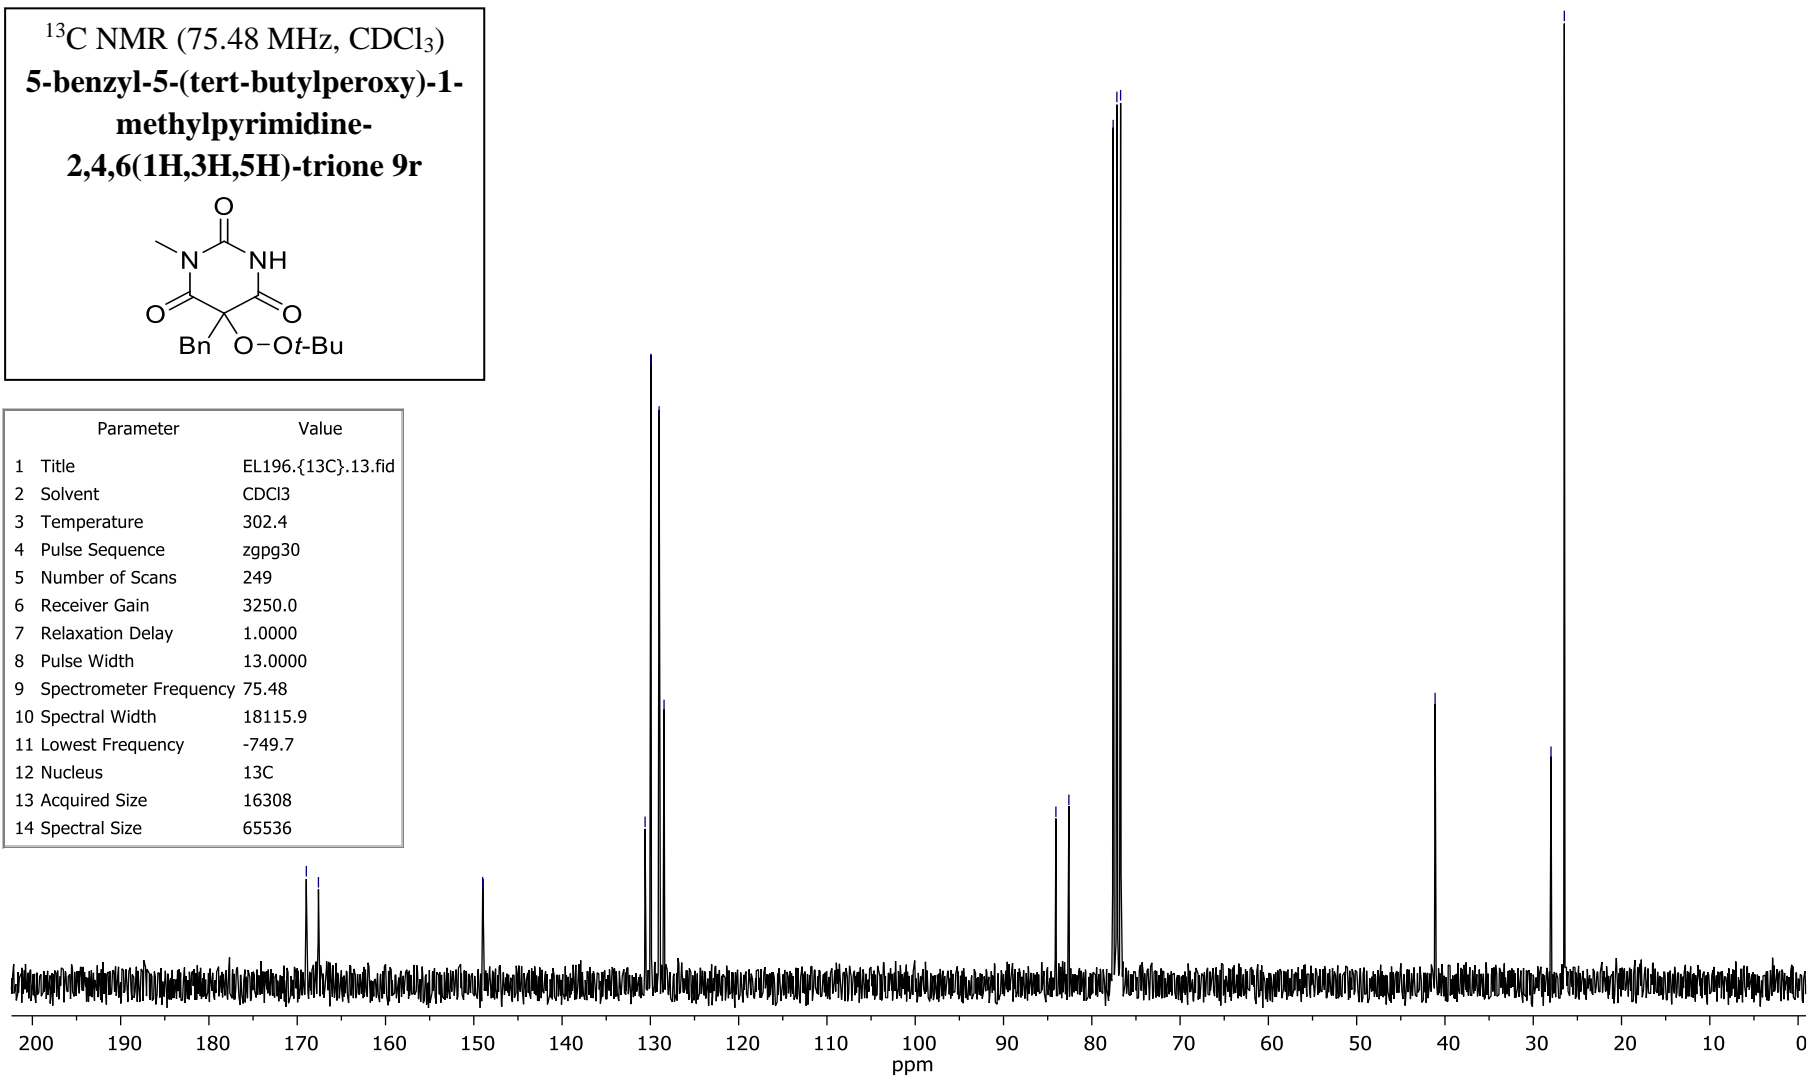

EL180.{1H}.1.fid  
Avance-300, CDCl<sub>3</sub>

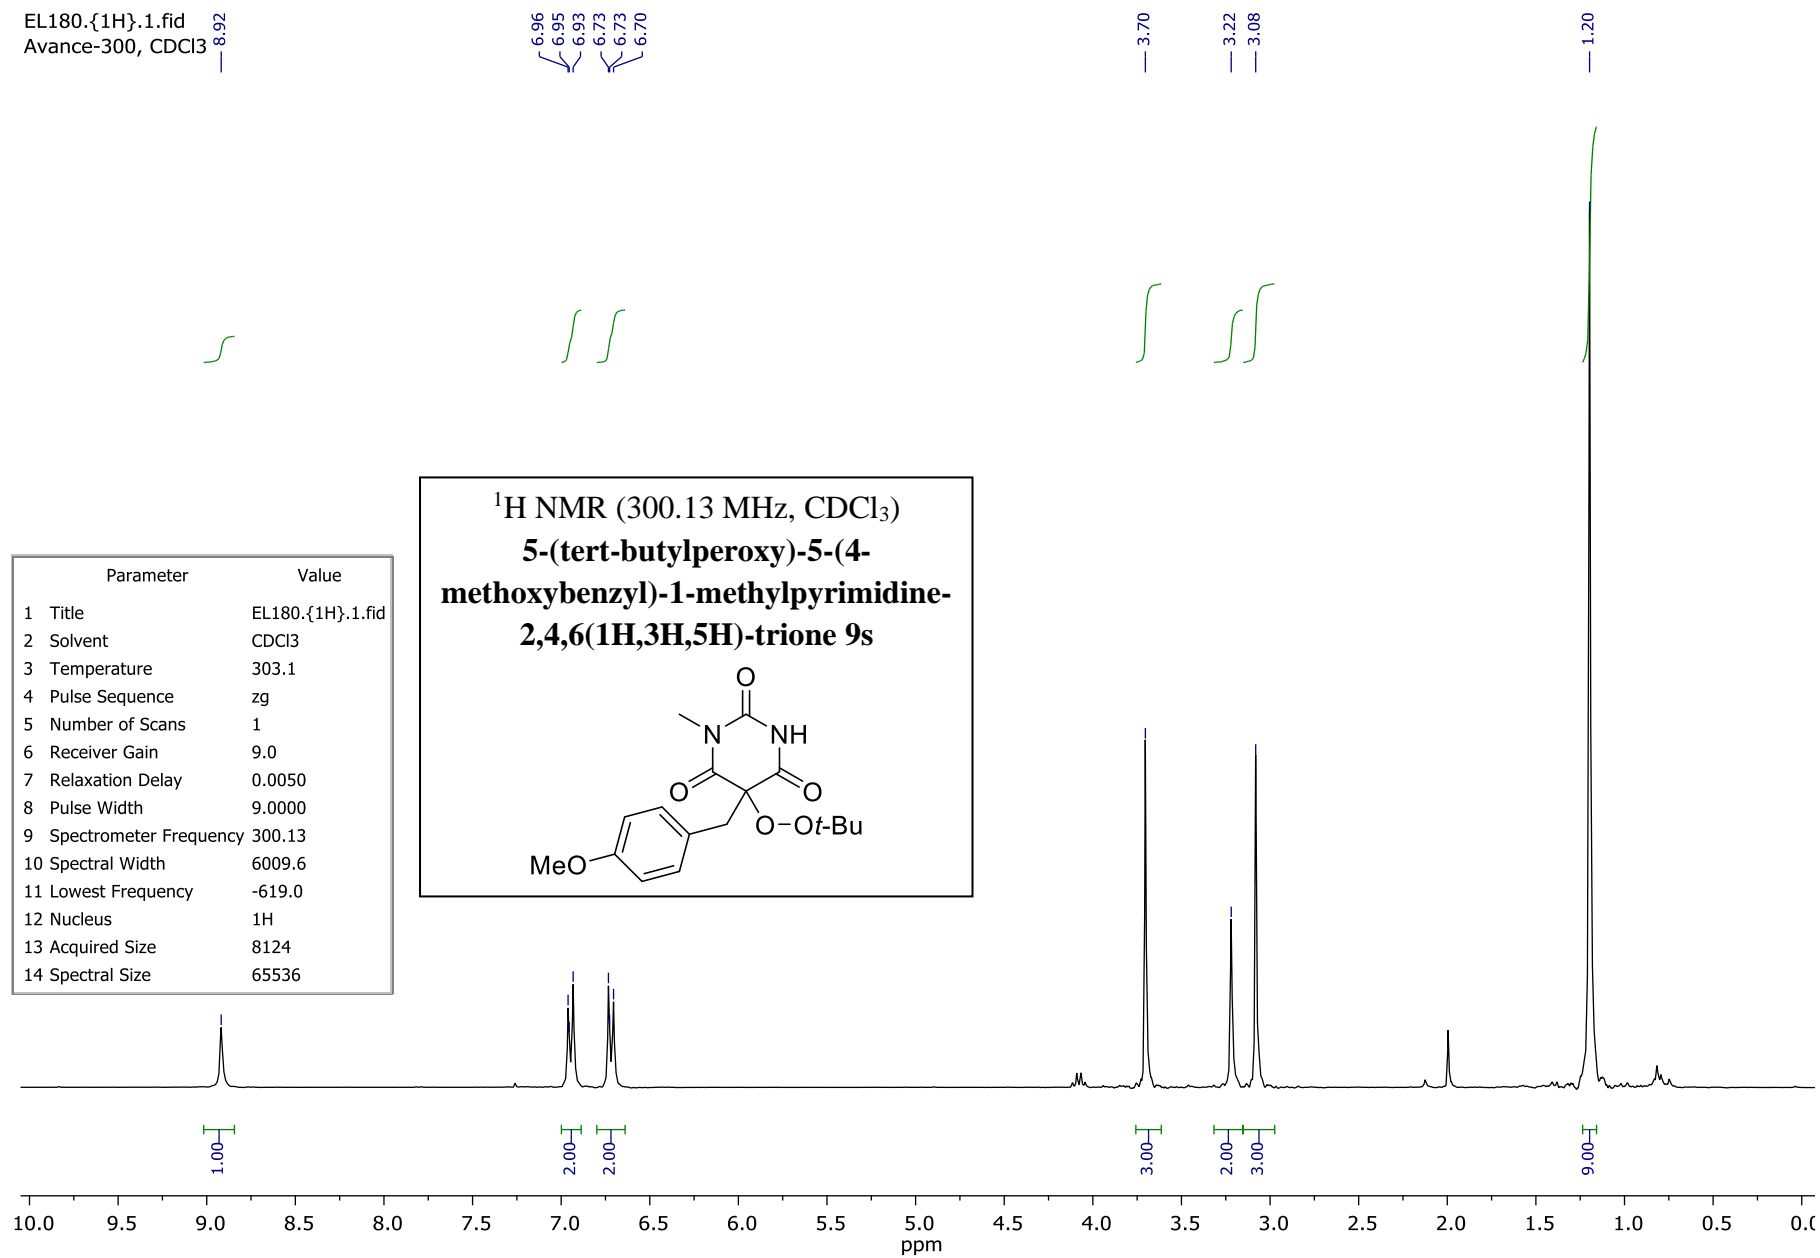



EL180.{13C}.13.fid  
/LB58 IYT1588

169.06  
167.99

159.45

149.27

130.97

122.23

114.30

83.96  
82.35  
77.58  
77.16  
76.74

55.15

40.17

27.87  
26.36

| Parameter                | Value              |
|--------------------------|--------------------|
| 1 Title                  | EL180.{13C}.13.fid |
| 2 Solvent                | CDCl3              |
| 3 Temperature            | 303.2              |
| 4 Pulse Sequence         | zgpg30             |
| 5 Number of Scans        | 99                 |
| 6 Receiver Gain          | 3250.0             |
| 7 Relaxation Delay       | 1.0000             |
| 8 Pulse Width            | 13.0000            |
| 9 Spectrometer Frequency | 75.48              |
| 10 Spectral Width        | 18115.9            |
| 11 Lowest Frequency      | -751.6             |
| 12 Nucleus               | 13C                |
| 13 Acquired Size         | 16308              |
| 14 Spectral Size         | 65536              |

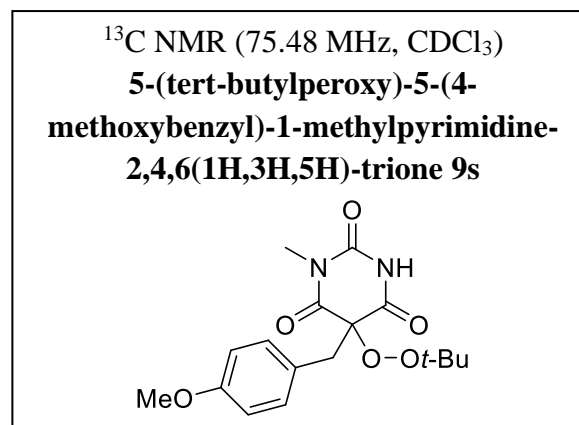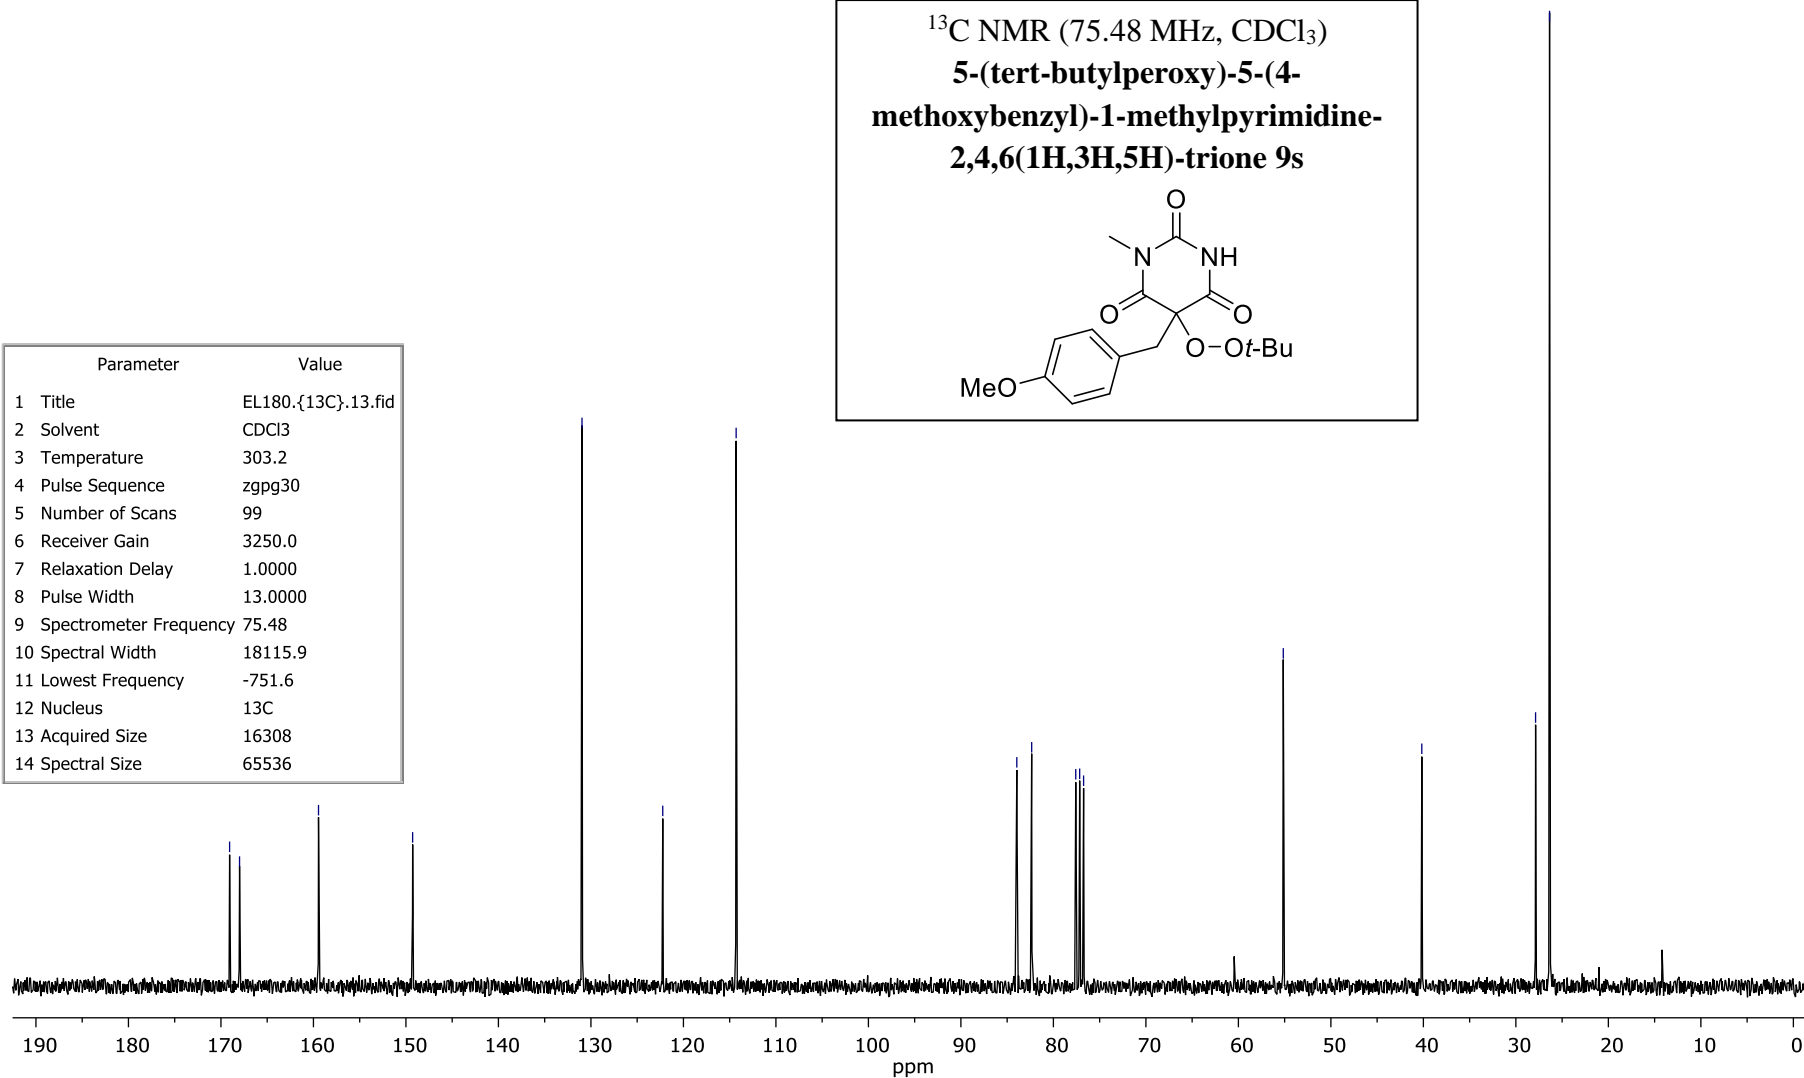

7.23  
7.22  
7.21  
7.21  
7.20  
6.92  
6.92  
6.90  
6.89

3.75

3.21

3.06

<sup>1</sup>H NMR (300.13 MHz, CDCl<sub>3</sub>)

**5-benzyl-5-hydroxy-1,3-dimethylpyrimidine-2,4,6(1H,3H,5H)-trione 10a**

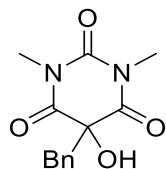

| Parameter                 | Value             |
|---------------------------|-------------------|
| 1 Title                   | EL1477.{1H}.1.fid |
| 2 Solvent                 | CDCl <sub>3</sub> |
| 3 Temperature             | 300.9             |
| 4 Pulse Sequence          | zg                |
| 5 Number of Scans         | 1                 |
| 6 Receiver Gain           | 40.3              |
| 7 Relaxation Delay        | 0.0050            |
| 8 Pulse Width             | 9.0000            |
| 9 Acquisition Time        | 1.3518            |
| 10 Spectrometer Frequency | 300.13            |
| 11 Spectral Width         | 6009.6            |
| 12 Lowest Frequency       | -627.9            |
| 13 Nucleus                | <sup>1</sup> H    |
| 14 Acquired Size          | 8124              |
| 15 Spectral Size          | 65536             |

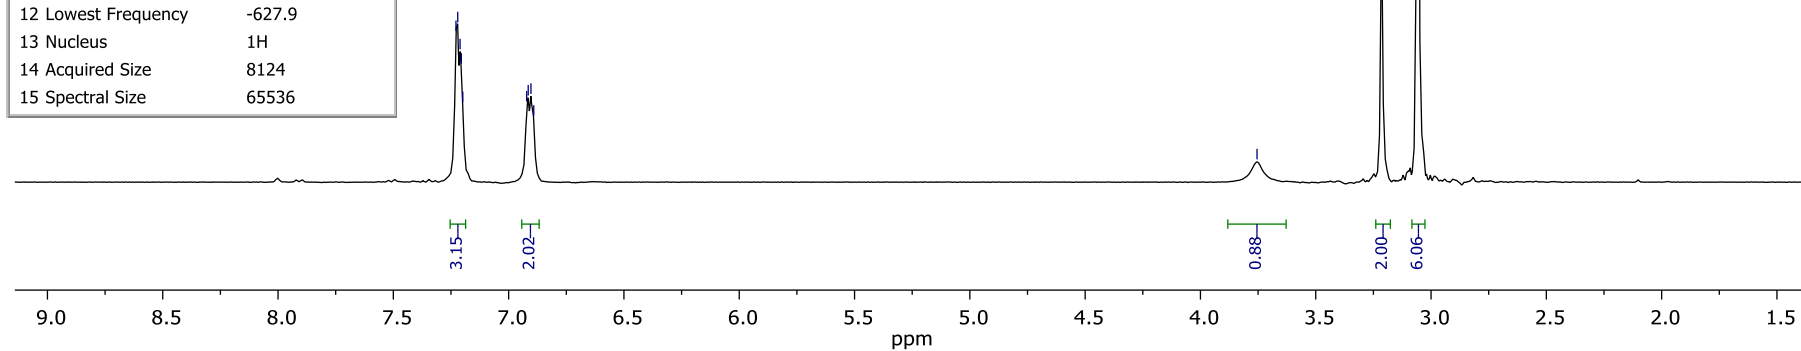

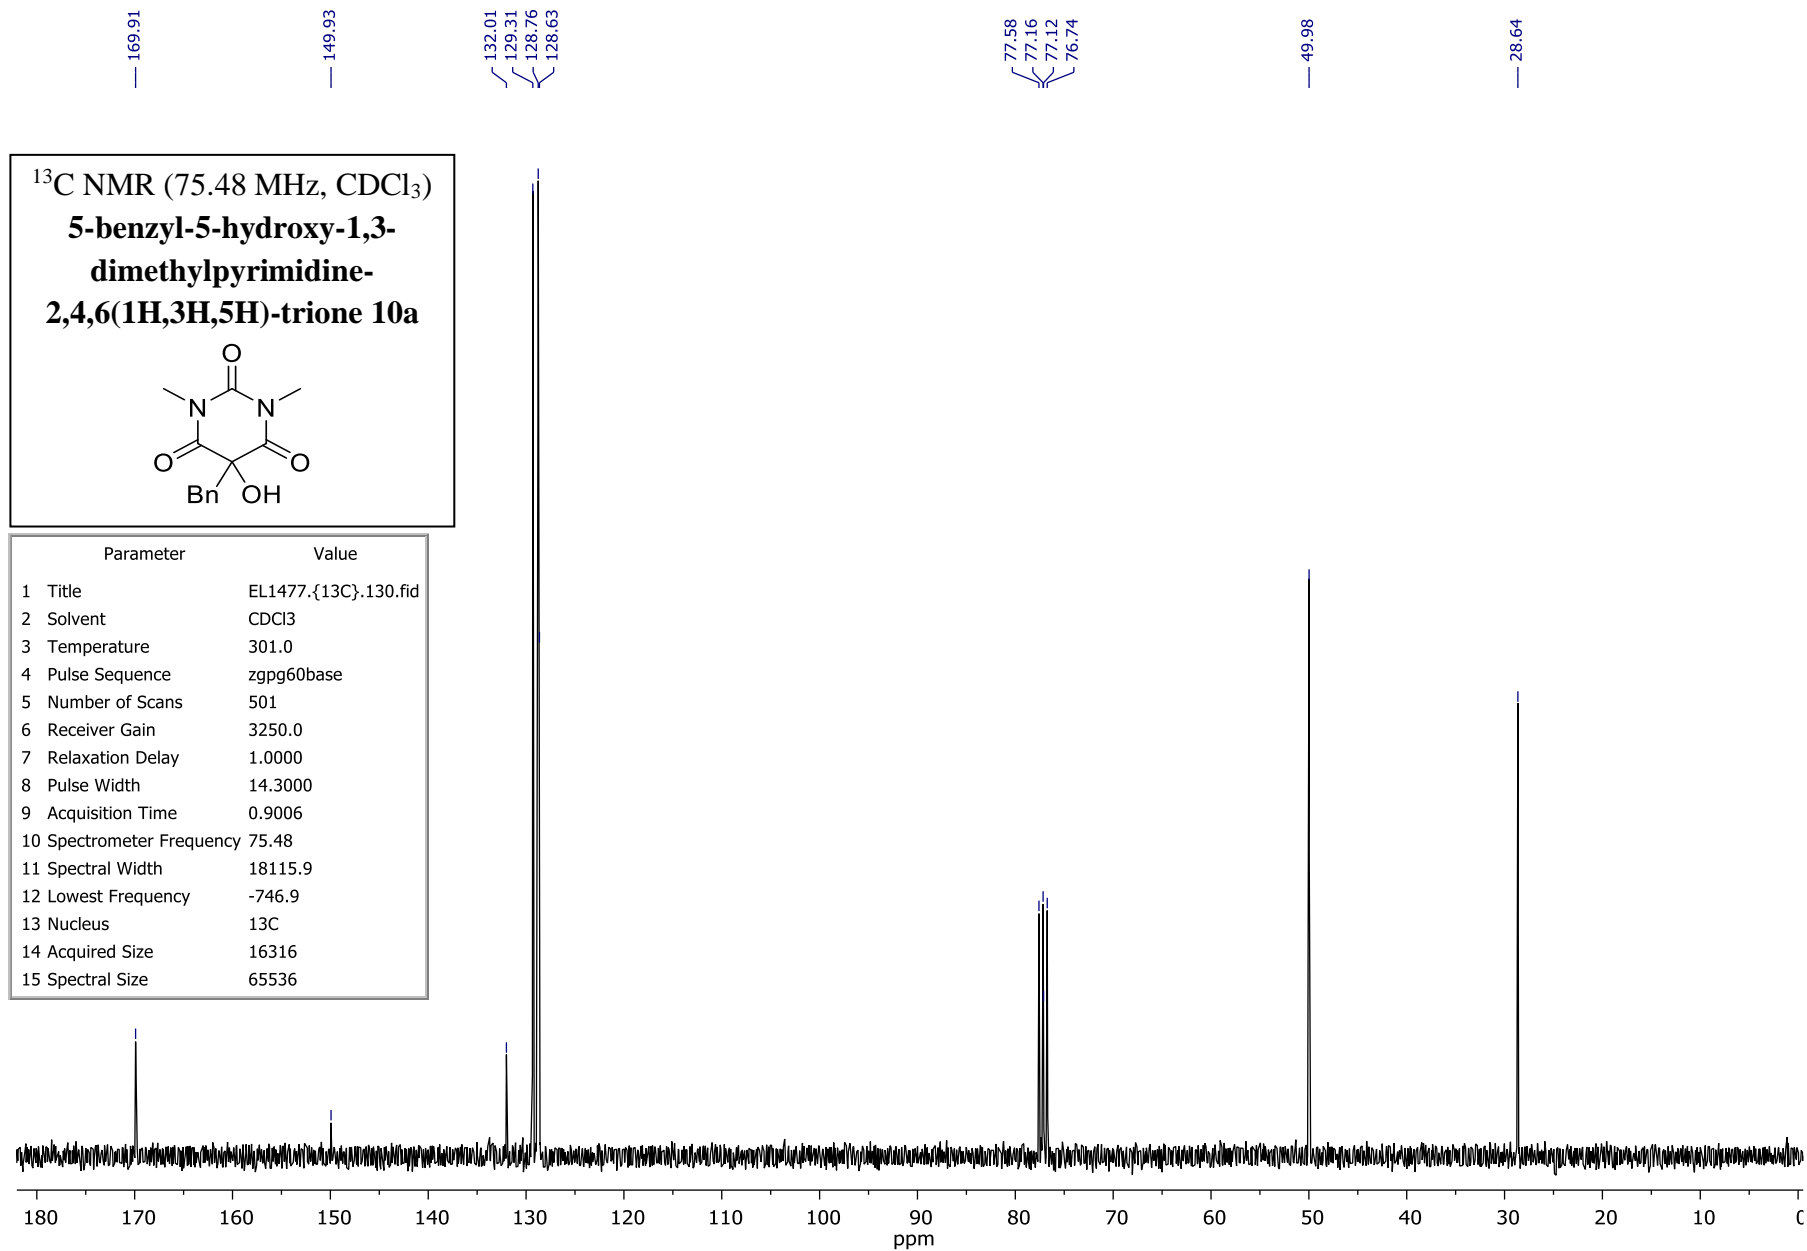

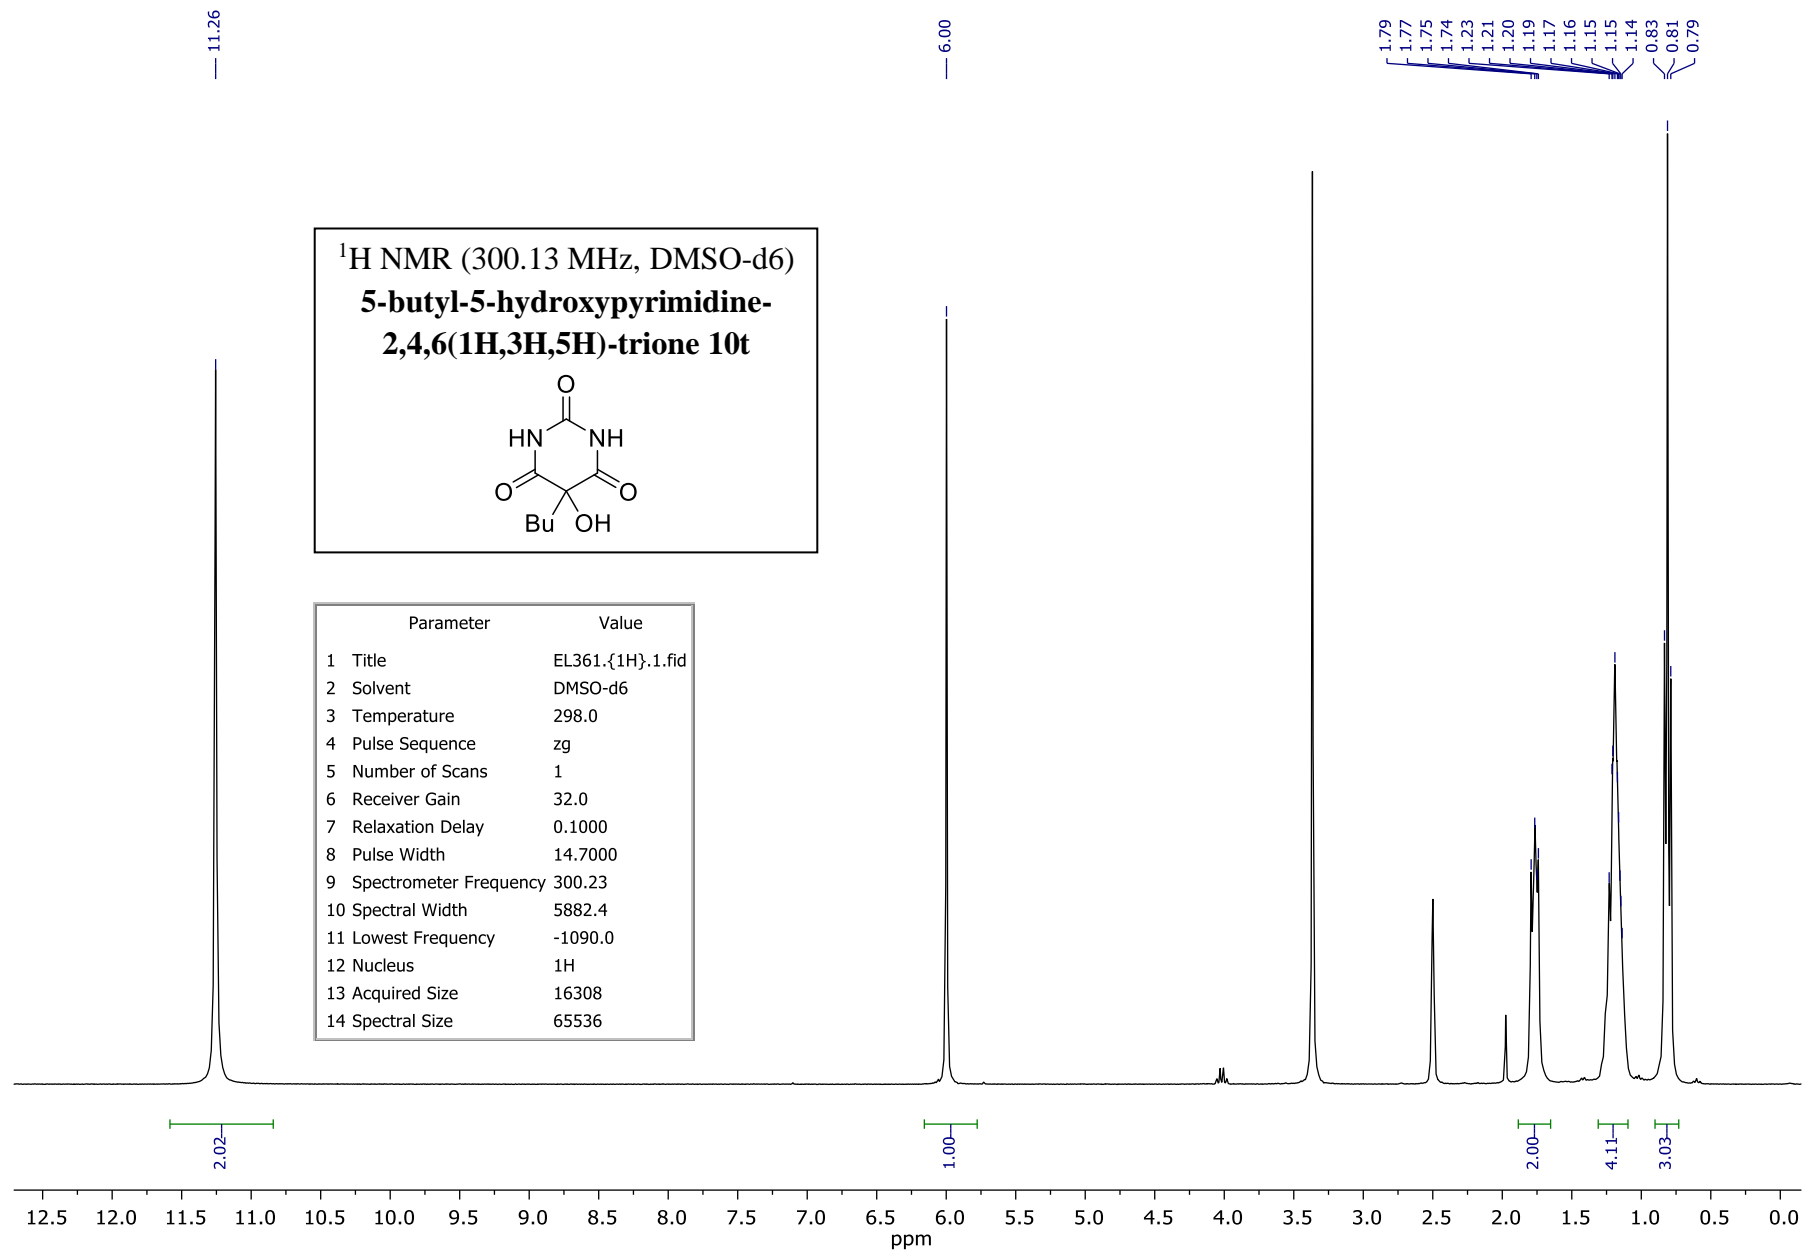

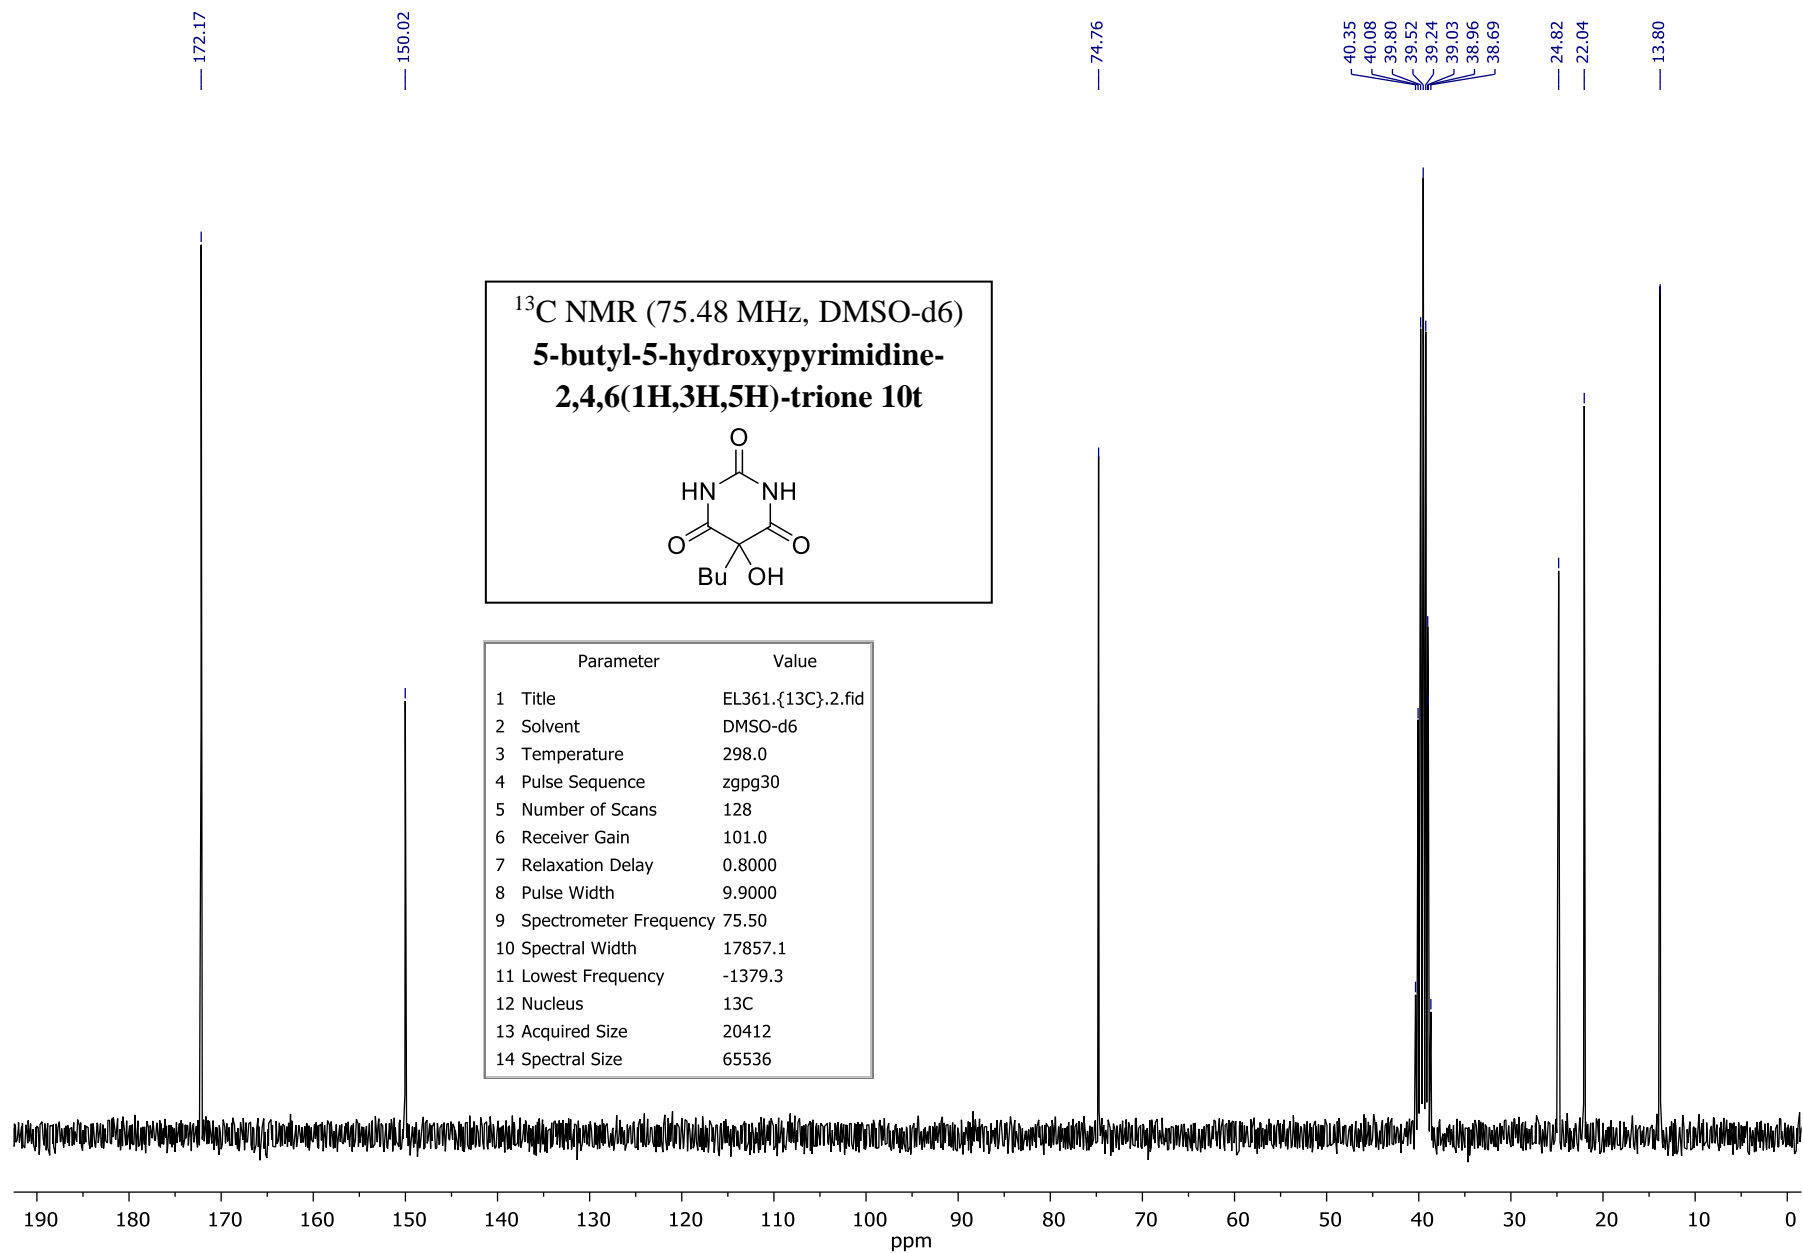

EL209.{1H}.1.fid  
/MBCI 4MEOGL4MEBNDME

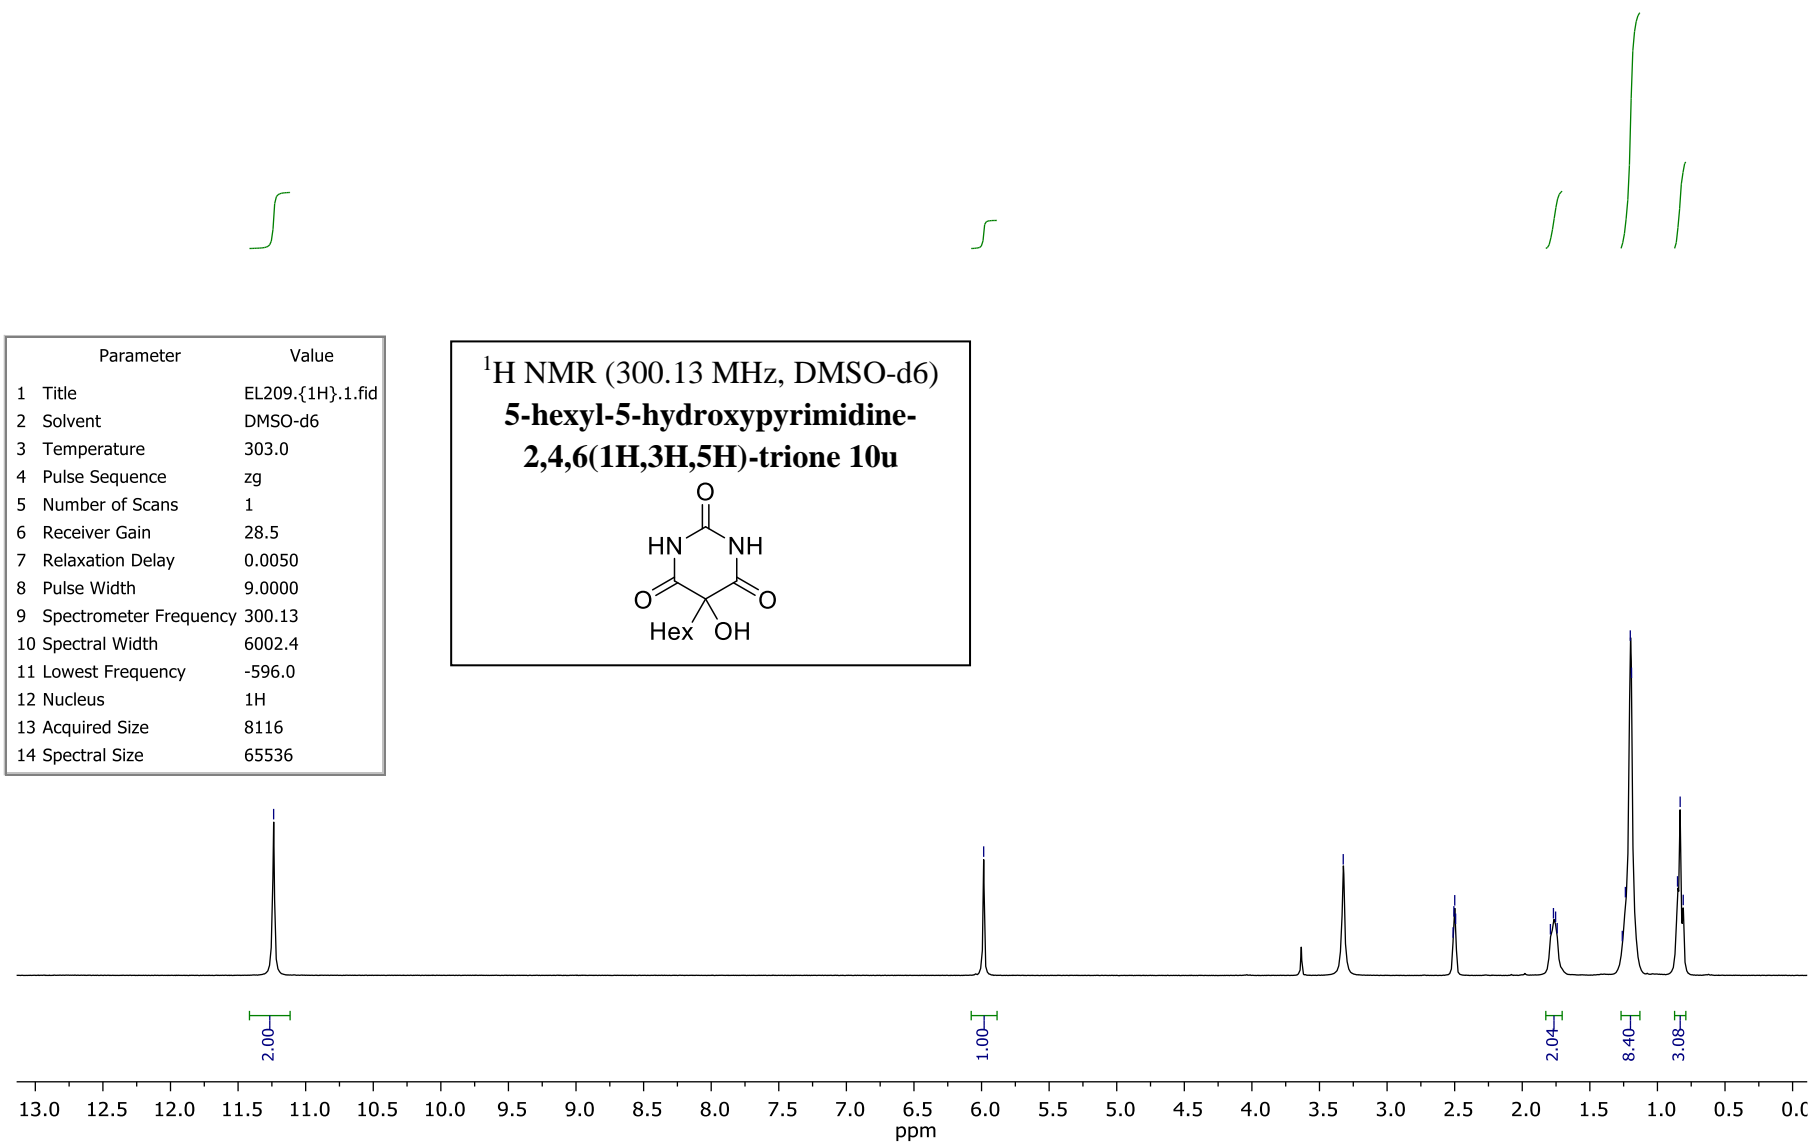

EL209.{13C}.13.fid  
/KANI VEE06.1

— 172.6

— 149.91

— 74.69

40.36  
40.08  
39.81  
39.53  
39.25  
39.16  
38.97  
38.70  
30.92  
28.35  
22.47  
21.87  
— 13.83

| Parameter                | Value              |
|--------------------------|--------------------|
| 1 Title                  | EL209.{13C}.13.fid |
| 2 Solvent                | DMSO-d6            |
| 3 Temperature            | 303.0              |
| 4 Pulse Sequence         | zgpg60base         |
| 5 Number of Scans        | 146                |
| 6 Receiver Gain          | 3250.0             |
| 7 Relaxation Delay       | 1.0000             |
| 8 Pulse Width            | 14.3000            |
| 9 Spectrometer Frequency | 75.48              |
| 10 Spectral Width        | 18115.9            |
| 11 Lowest Frequency      | -792.2             |
| 12 Nucleus               | 13C                |
| 13 Acquired Size         | 16316              |
| 14 Spectral Size         | 65536              |

<sup>13</sup>C NMR (75.48 MHz, DMSO-d6)

**5-hexyl-5-hydroxypyrimidine-  
2,4,6(1H,3H,5H)-trione 10u**

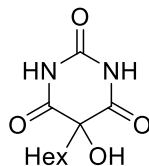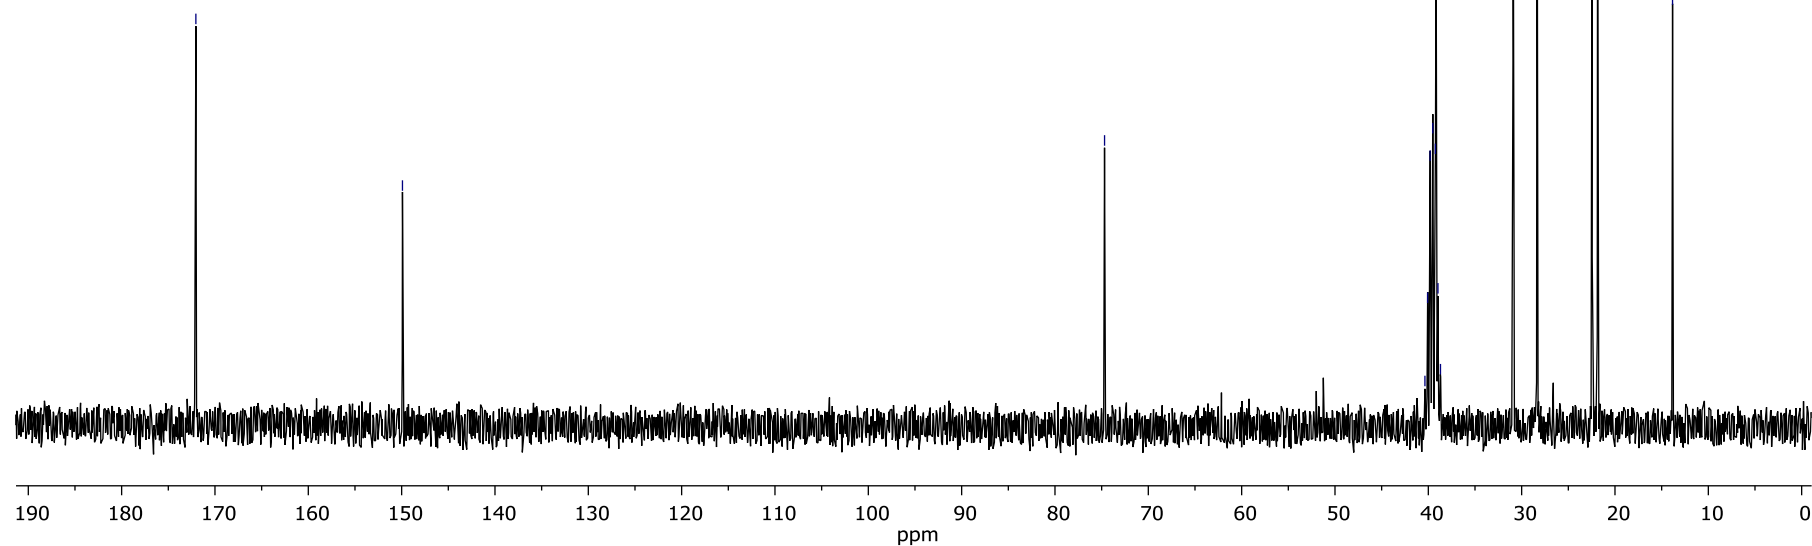

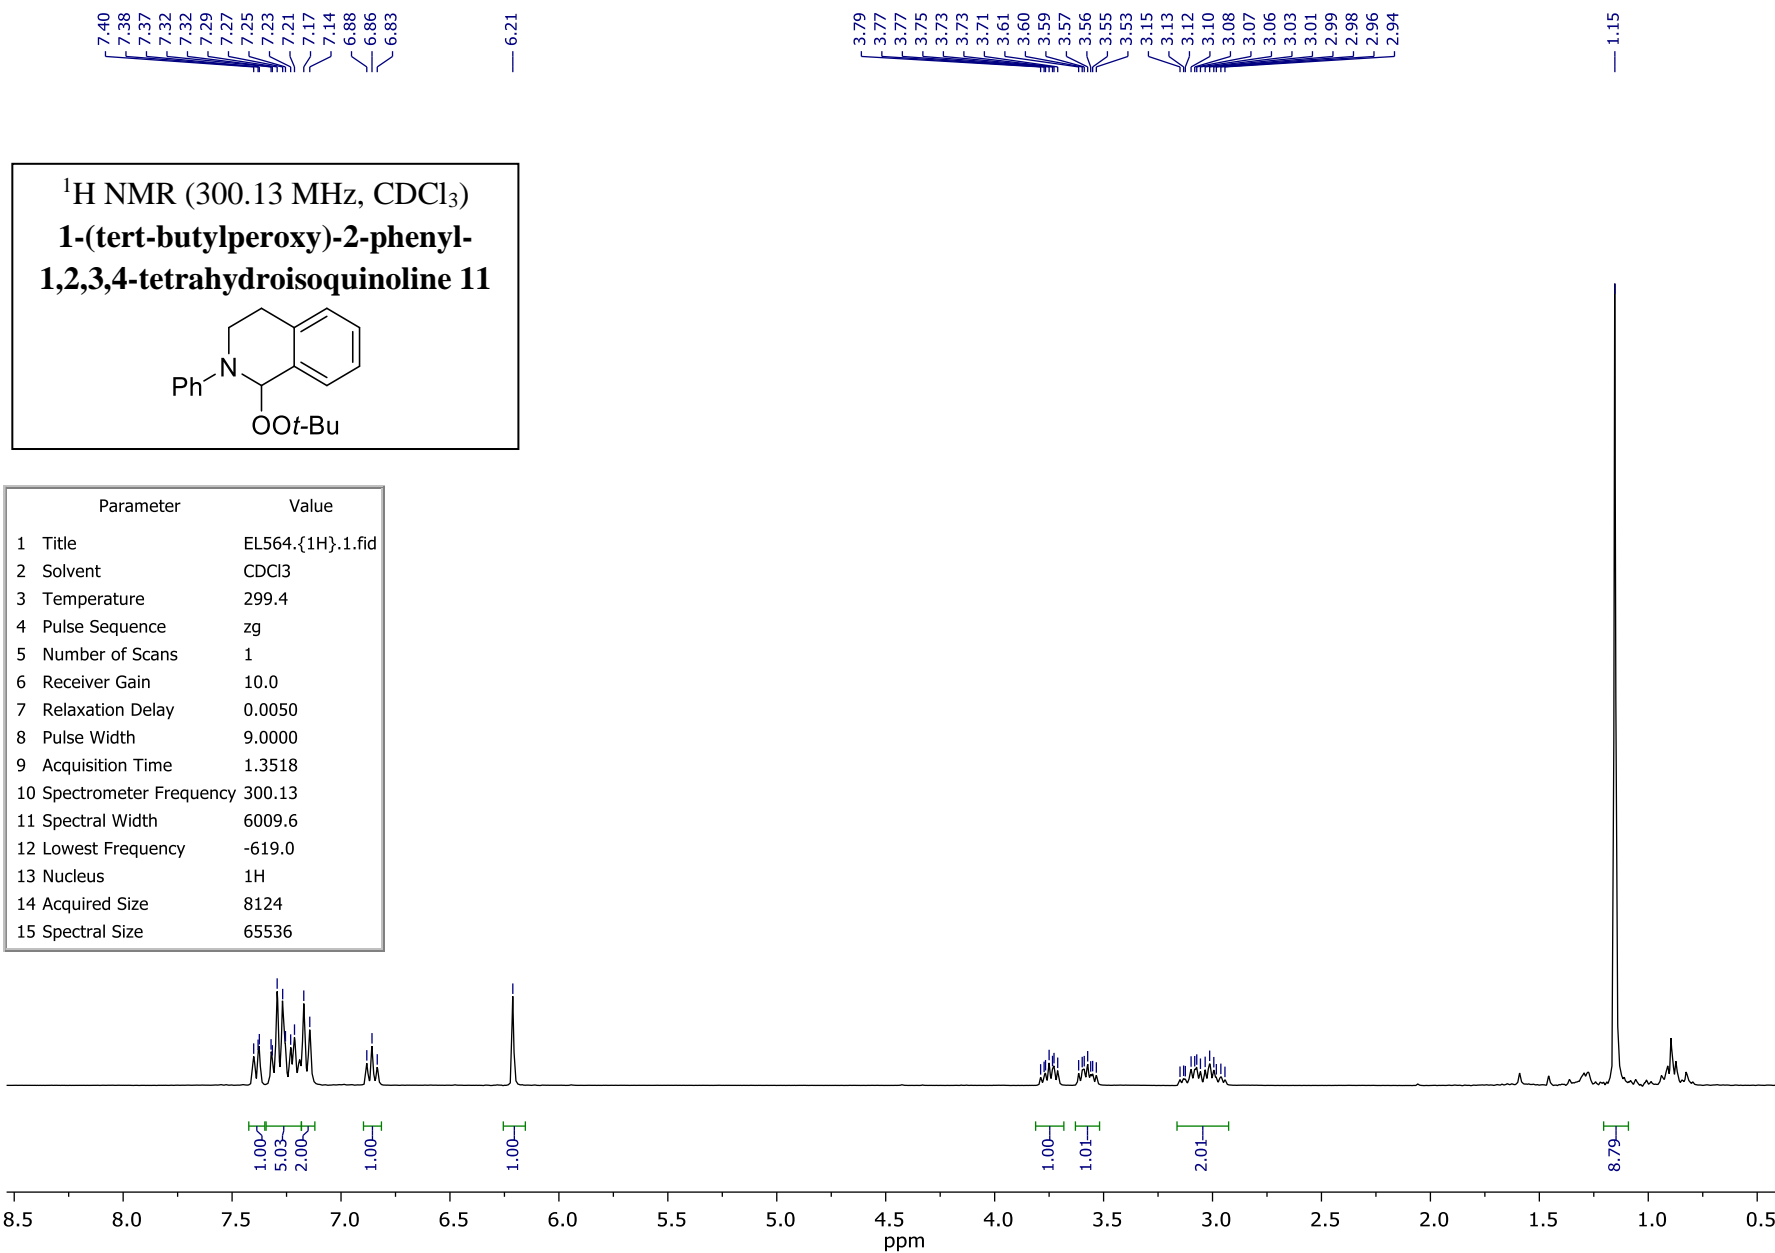



<sup>13</sup>C NMR (75.48 MHz, CDCl<sub>3</sub>)  
**1-(tert-butylperoxy)-2-phenyl-  
 1,2,3,4-tetrahydroisoquinoline 11**

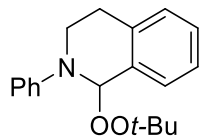

| Parameter                 | Value                           |
|---------------------------|---------------------------------|
| 1 Title                   | EL564.{ <sup>13</sup> C}.13.fid |
| 2 Solvent                 | CDCl <sub>3</sub>               |
| 3 Temperature             | 299.2                           |
| 4 Pulse Sequence          | zgpg30                          |
| 5 Number of Scans         | 145                             |
| 6 Receiver Gain           | 3250.0                          |
| 7 Relaxation Delay        | 1.0000                          |
| 8 Pulse Width             | 13.0000                         |
| 9 Acquisition Time        | 0.9002                          |
| 10 Spectrometer Frequency | 75.48                           |
| 11 Spectral Width         | 18115.9                         |
| 12 Lowest Frequency       | -756.1                          |
| 13 Nucleus                | <sup>13</sup> C                 |
| 14 Acquired Size          | 16308                           |
| 15 Spectral Size          | 65536                           |

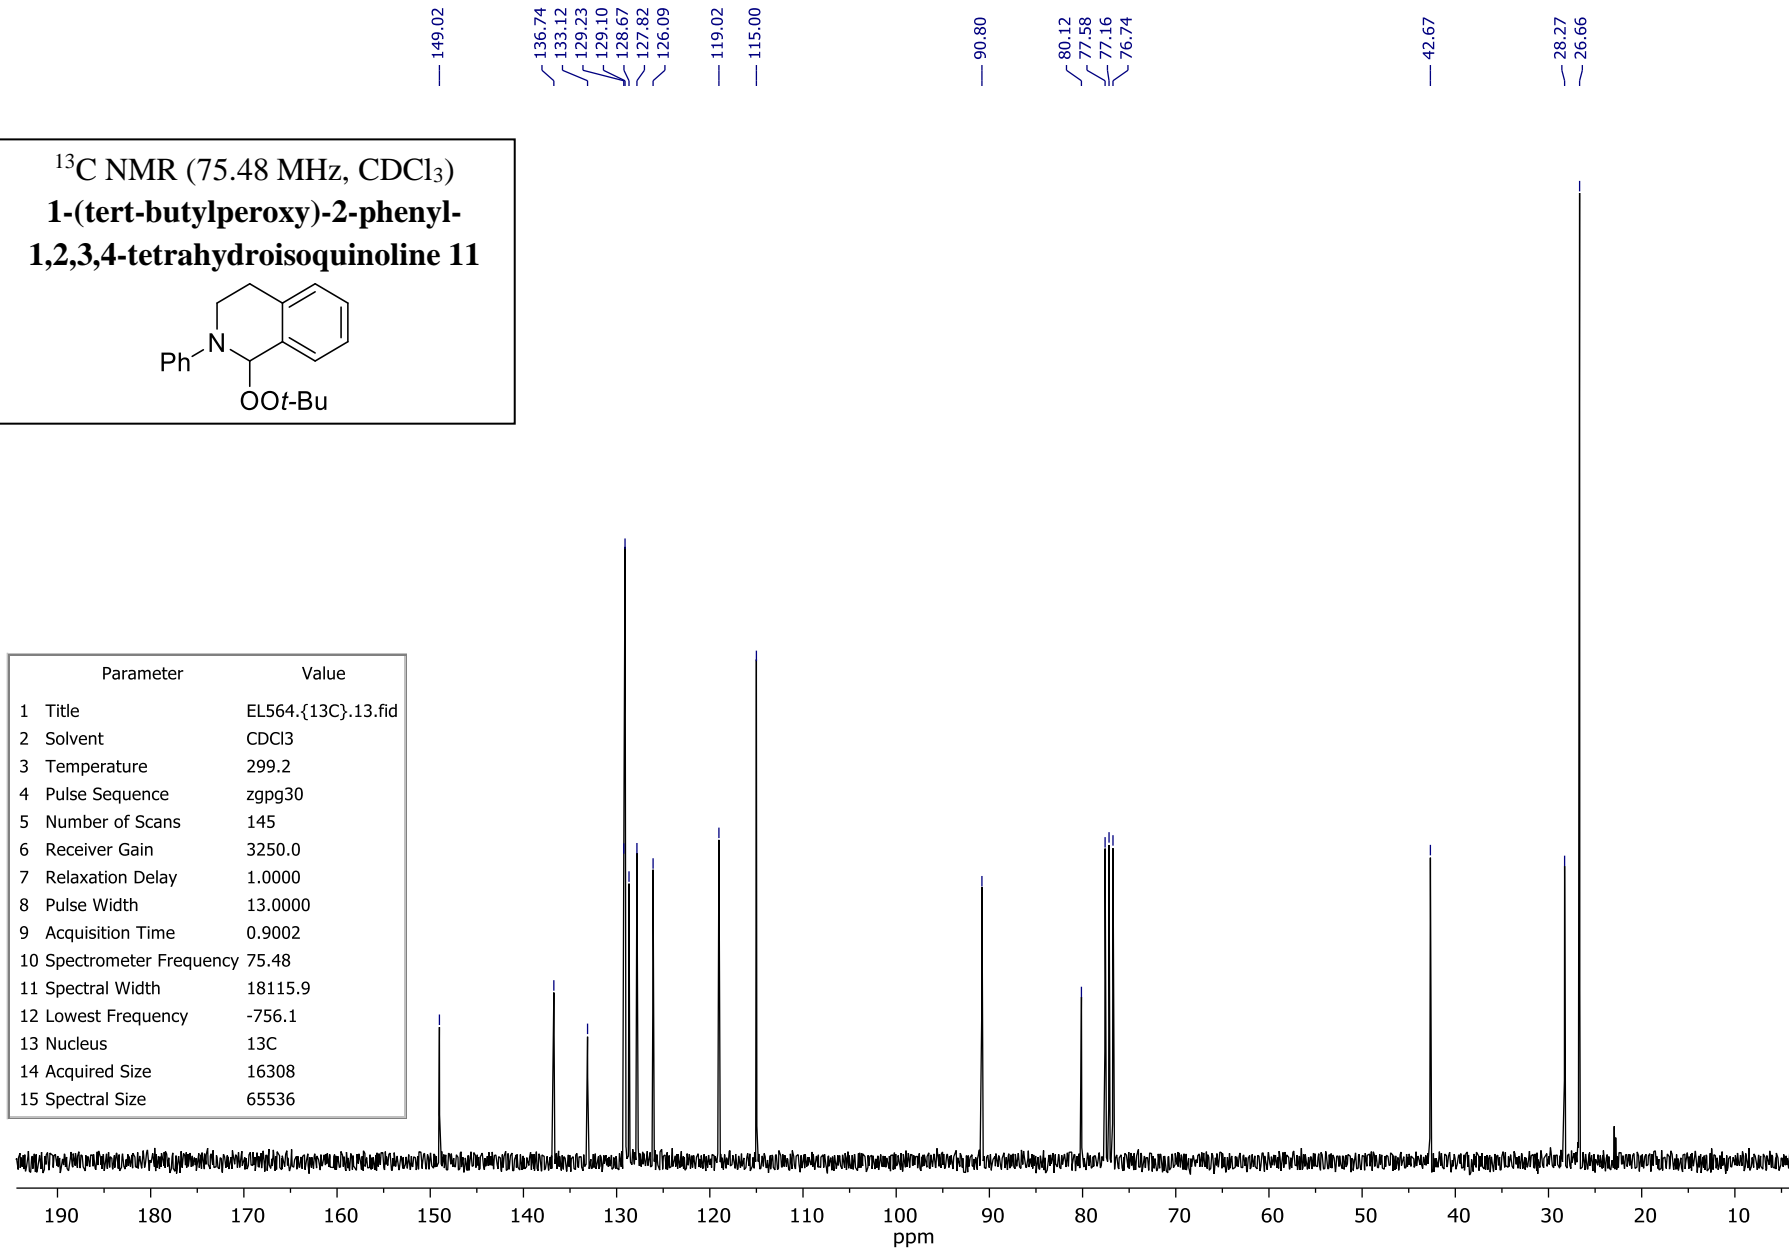

Supplement: s1 [file s1]
