# Supplementary material for: t-BuOOH/TiO2 Photocatalytic System as a Convenient Peroxyl Radical Source at Room Temperature under Visible Light and Its Application for the CH-Peroxidation of Barbituric Acids
Source: MDPI journal article supplement (doi:10.3390/catal13091306), 2023-09-19
Supplement: s1 [file s1]

Archive with 1 entries (1 files):
- catalysts-2559857-supplementary.pdf
